# Supplementary material for: Molecular and biological analysis revealed genetic diversity and high virulence strain of Toxoplasma gondii in Japan
Source: PubMed Central journal article supplement (PMC6996823; doi:10.1371/journal.pone.0227749), 2020-02-03
Supplement: pone.0227749.s004.pdf [file pone.0227749.s004.pdf]

Dense granule protein 6 (GRA6)

>GT1

ATGGCACACGGTGGCATCCATCTGAGGCAGAAGCGTAACTTCTGTCCT  
GTAAGTGTCTCCACAGTTGCTGTGGTCTTTGTAGTCTTCATGGGTGTA  
CTCGTCAATTCGTTGGGTGGAGTCGCTGTCGCAGCAGACAGCGGTGG  
TGTTAAGCAGACCCCTTCGGAAACCGGTTTCGAGCGGTGGACAGCAAGA  
AGCAGTGGGGACCACTGAAGACTATGTCAACTCTTCGGCGATGGGCG  
GTGGCCAAGGCGACTCGTTAGCTGAAGATGATACAACCTCCGAAGCGG  
CGGAGGGCGACGTTGACCCTTTTCCCGTGCTGGCGAATGAGGGGAAG  
TCGGAGGCGCGTGGCCCGTCGCTCGAGGAAAGAATCGAAGAACAGGG  
CACAAGACGACGTTACTCCTCTGTTCAAGAACCACAAGCGAAGGTGCC  
TAGCAAACGAACACAGAAACGCCACAGACTCATTGGTGCTGTGGTGT  
GGCAGTATCTGTGGCAATGCTTACCGCTTTCTTTCTTCGAAGGACTGG  
ACGACGCTCTCCCAAGAACCATCTGGGGATGGTGGTGGAAATGATGC  
AGGCAATAATGCTGGGAACGGTGGGAATGAAGGCAGAGGTTACGGAG  
GCAGAGGTGAAGGAGGAGCCGAGGATGACAGGCGCCCGTTGCACCCG  
GAACGTGTGAATGTGTTTGATTATTAA

>ME49

ATGGCACACGGTGGCATCTATCTGAGGCAGAAGCGTAACTTCTGTCCT  
TTAACTGTCTCCACAGTTGCTGTGGTCTTTGTAGTCTTCATGGGTGTA  
CTCGTCAATTCGTTGGGTGGAGTCGCTGTCGCAGCAGACAGCGGTGG  
TGTTAGGCAGACCCCTTCGGAAACCGGTTTCGAGCGGTGGACAGCAAG  
AAGCAGTGGGGACCACTGAAGACTATGTCAACTCTTCGGCGATGGGC  
GGTGGCCAAGGCGACTCGTTAGCTGAAGATGATACAACCTCCGATGCG  
GCGGAGGGCGACGTTGACCCTTTTCCCGCGCTGGCGAATGAGGGGAA  
GTCGGAGGCGCGTGGCCCGTCGCTCGAGGAAAGAATCGAAGAACAGG  
GCACAAGACGACGTTACTCCTCTGTTCAAGAACCACAAGCGAAGGTGC  
CTAGCAAACGAACACAGAAACGCCACAGACTCATTGGTGCTGTGGTGT  
TGGCAGTATCTGTGGCAATGCTTACCGCTTTCTTTCTTCGAAGGACTG  
GACGACGCTCTCCCAAGAACCATCTGGGGGTGGTGGTGGAAATGAT  
GCAGGCAATAATGCTGGGAACGGTGGGAATGAAGGCAGAGGTGAAGG  
AGGCGAGGATGACAGGCGCCCGTTGCACCCGGGAAGTGTGAATGAGT  
TTGATTTTAA

>VEG

ATGGCACACGGTGGCATCCATCTGAGGCAGAAGCGTAACTTCTGTCCT  
TTAACTGTCTCCACAGTTGCTGTGGTCTTTGTAGTTTTTCATGGGTGTA  
CTCGTCAATTCGTTGGGTGGAGTCGCTGTCGCAGCAGACAGCGATGG  
TGTTAAGCAGACCCCTTCGGAAACCGGTTTCGAGCGGTGGACAGCAAGA  
AGCAGTGGGGACCACTGAAGACTATGTCAACTCTTCGGCGATGGGCG  
GTGGCCAAGGCGACTCGTTAGCTGAAGATGATACAACCTCCGATGCGG  
CGGAGGGCGACGTTGACCCTTTTCCCGTGCTGGCGAATGAGGGGAAG  
TCGGAGGCGCGTGGCCCGTCGCTCGAGGAAAGAATCGAAGAACAGGG  
CACAAGACGACGTTACTCCTCTGTTCAAGAACCACAAGCGAAGGTGCC  
TAGCAAACGAACACAGAAACGCCACAGACTCATTGGTGCTGTGGTGT  
GGCAGTATCTGTGGCAATGCTTACCGCTTTCTTTCTTCGAAGGACTGG  
ACGACGCTCTCCCCAGAACCATCTGGGGATGGTGGTGGAAATGATG  
CAGGCAATAATGCTGGGAACCGTGGGAATGAAGGCAGAGGTTACGGA  
GGCAGAGGTGAAGGAGGAGGCGAGGATGACAGGCGCGCGTTCACCC  
GGAACGTGTGAATGTGTTTGATTATTAA

>MAS

ATGGCACACGGTGGCATCTATCTGAGGCAGAAGCGTAACTTCTGTCCT  
TTAACTGTCTCCACAGTTGCTGTGGTCTTTGTAGTCTTCATGGGTGTA  
CTCGTCAATTCGTTGGGTGGAGTCGCTGTCGCAGCAGACAGCGGTGG  
TGTTAAGCAGACCCCTTCGGAAACCGGTTTCGAGCGGTGGACAGCAAGA  
AGCAGTGGGGACCACTGAAGACTATGTCAACTCTTCGGCGATGGGCG  
GTGGCCAAGGCGACTCGTTAGCTGAAGATGATACAACCTCCGATGCGG  
CGGAGGGCGACGTTGACCCTTTTCCCGCGCTGGCGAATGAGGGGAAG  
TCGGAGGCGCGTGGCCCGTCGCTCGAGGAAAGAATCGAAGAACAGGG  
CACAAGACGACGTTACTCCTCTGTTCAAGAACCACAAGCGAAGGTGCC  
TAGCAAACGAACACAGAAACGCCACAGACTCATTGGTGCTGTGGTGT  
GGCAGTATCTGTGGCAATGCTTACCGCTTTCTTTCTTCGAAGGACTGG  
ACGACGCTCTCCCCAAGAACCATCTGGGGGTGGTGGTGGAAATGATG  
CAGGCAATAATGCTGGGAACCGTGGGAATGAAGGCAGAGGTTACGGA  
GGCAGAGGTGAAGGAGGCGAGGATGGCAGGGGCCCGTTCACCCGG  
GAAGTGTGAATGAGTTTGATTTTAA

>RUB

ATGGCACACGGTGGCATCCATCTGAGGCAGAAGCGTAACTTCTGTCCT

TTAACTGTCTCCACAGTTGCTGTGGTCTTTGTAGTCTTCATGGGTGTA  
CTCGTCAATTCGTTGGGTGGAGTCGCTGTCGCAGCAGACAGCGGTGG  
TGTTAAGCAGACCCCTTCGGAAACCGGTTTGAGCGGTGGACAGCAAGA  
AGCAGTGGGGACCACTGAAGACTATGTCAACTCTTCGGCGATGGGCG  
GTGGCCAAGGCGACTCGTTAGCTGAAGATGATAACAACCTCCGATGCGG  
CGGAGGGCGACGTTGACCCTTTTCCCGTGCTGGCGAATGAGGGGAAG  
TCGGAGGCGCGTGGCCCGTCGCTCGAGGAAAGAATCGAAGAACAGGG  
CACAAGACGACGTTACTCCTCTGTTCAAGAACCACAAGCGAAGGTGCC  
TAGCAAACGAACACAGAAACGCCACAGACTCATTGGTGCTGTGGTGTT  
GGCAGTATCTGTGGCAATGCTTACCGCTTTCTTTCTTCGAAGGACTGG  
ACGACGCTCTCCCCAGAACCATCTGGGCATGGTGGTGGAAATGATGC  
AGGCAATAATGCTGGGAACGGTGGGAATGAAGGCAGAGGTTACGGAG  
GCAGAGGTGAAGGAGGAGGCGAGGATGACAGGCGCGCGTTCACCTG  
GAACGTGTGAATGCGTTTGATTATTAA

>FOU

ATGGCACACGGTGGCATCCATCTGAGGCAGAAGCGTAACTTCTGTCCT  
TTAACTGTCTCCACAGTTGCTGTGGTCTTTGTAGTCTTCATGGGTGTA  
CTCGTCAATTCGTTGGGTGGAGTCGCTGTCGCAGCAGACAGCGGTGG  
TGTTAAGCAGACCCCTTCGGAAACCGGTTTCGAGCGGTGGACAGCAAG  
AAGCAGTGGGGACCACTGAAGACTATGTCAACTCTTCGGCGATGGGC  
GGTGGCCAAGGCGACTCGTTAGCTGAAGATGATAACAACCTCCGATGCG  
GCGGAGGGCGACGTTGACCCTTTTCCCGTGCTGGCGAATGAGGGGAA  
GTCGGAGGCGCGTGGCCCGTCGCTCGAGGAAAGAATCGAAGAACAGG  
GCACAAGACGACGTTACTCCTCTGTTCAAGAACCACAAGCGAAGGTGC  
CTAGCAAACGAACACAGAAACGCCACAGACTCATTGGTGCTGTGGTG  
TGGCAGTATCTGTGGCAATGCTTACCGCTTTCTTTCTTCGAAGGACTG  
GACGACGCTCTCCCCAGAACCATCTGGGGATGGTGGTGGAAATGAT  
GCAGGCAATAATGCTGGGAACGGTGGGAATGAAGGCAGAGGTTACAG  
AGGCAGAGGTGAAGGAGGAGGCGAGGATGACGGGCGCGCGTTCACCC  
CGGAACGTGTGAATGTGTTTGATTATTAA

>CAST

ATGGCACACGGTGGCATCCATCTGAGGCAGAAGCGTAACTTCTGTCCT  
GTTAACTGTCTCCACAGTTGCTGTGGTCTTTGTAGTCTTCATGGGTGTA  
CTCGTCAATTCGTTGGGTGGAGTCGCTGTCGCAGCAGACAGCGGTGG

TGTTAAGCAGACCCCTTCGGAAACCGGTTTCGAGCGGTGGACAGCAAGA  
AGCAGTGGGGACCACTGAAGACTATGTCAACTCTTCGGCGATGGGCG  
GTGGCCAAGGCGACTCGTCAGCTGAAGATGATAACAACCTCCGAAGCGG  
CGGAGGGCGACGTTGACCCTTTTCCCGTGCTGGCGAATGAGGGGAAG  
TCGGAGGCGCGTGGCCCGTCGCTCGAGGAAAGAATCGAAGAACAGGG  
CACAAGACGACGTTACTCCTCTGTTCAAGAACCACAAGCGAAGGTGCC  
TAGCAAACGAACACAGAAACGCCACAGACTCATTGGTGCTGTGGTGT  
GGCAGTATCTGTGGCAATGCTTACCGCTTTCTTTCTTCGAAGGACTGG  
ACGACGCTCTCCCAAGAACCATCTGGGGATGGTGGTGGAAATGATGC  
AGGCAATAATGCTGGGAACGGTGGGAATGAAGGCAGAGGTTACGGAG  
GCAGAGGTGAAGGAGGAGCCGAGGATGACAGGCGCCCGTTGCACCCG  
GAACGTGTGAATGTGTTTGATTATTAA

>TgCatBr5

ATGGCACACGGTGGCATCTATCTGAGGCAGAAGCGTAACTTCTGTCT  
TTAACTGTCTCCACAGTTGCTGTGGTCTTTGTAGTCTTCATGGGTGTA  
CTCGTCAATTCGTTGGGTGGAGTCGCTGTCGCAGCAGACAGCGGTGG  
TGTTAAGCAGACCCCTTCGGAAACCGGTTTCGAGCGGTGGACAGCAAGA  
AGCAGTGGGGACCACTGAAGACTATGTCAACTCTTCGGCGATGGGCG  
GTGGCCAAGGCGACTCGTTAGCTGAAGATGATAACAACCTCCGATGCGG  
CGGAGGGCGACGTTGACCCTTTTCCCGCGCTGGCGAATGAGGGGAAG  
TCGGAGGCGCGTGGCCCGTCGCTCGAGGAAAGAATCGAAGAACAGGG  
CACAAGACGACGTTACTCCTCTGTTCAAGAACCACAAGCGAAGGTGCC  
TAGCAAACGAACACAGAAACGCCACAGACTCATTGGTGCTGTGGTGT  
GGCAGTATCTGTGGCAATGCTTACCGCTTTCTTTCTTCGAAGGACTGG  
ACGACGCTCTCCCAAGAACCATCTGGGGGTGGTGGTGGAAATGATG  
CAGGCAATAATGCTGGGAACGGTGGGAATGAAGGCAGAGGTTACGGA  
GGCAGAGGTGAAGGAGGCGAGGATGGCAGGGGCCCGTTGCACCCGG  
GAAGTGTGAATGAGTTTGATTTTAA

>p89

ATGGCACACGGTGGCATCCATCTGAGGCAGAAGCGTAACTTCTGTCT  
TTAACTGTCTCCACAGTTGCTGTGGTCTTTGTAGTCTTCATGGGTGTA  
CTCGTCAATTCGTTGGGTGGAGTCGCTGTCGCAGCAGACAGCGATGG  
TGTTAAGCAGACCCCTTCGGAAACCGGTTTCGAGCGGTGGACAGCAAGA  
AGCAGTGGGGACCACTGAAGACTATGTCAACTCTTCGGCGATGGGCG

GTGGCCAAGGCGACTCGTTAGCTGAAGATGATACAGCCTCCGATGCGG  
CGGAGGGCGACGTTGACCCTTTTCCCGTGCTGGCGAATGAGGGGAAG  
TCGGAGGCGCGTGGCCCGTCGCTCGAGGAAAGAATCGAAGAACAGGG  
CACAAGACGACGTTACTCCTCTGTTCAAGAACCACAAGCGAAGGTGCC  
TAGCAAACGAACACAGAAACGCCACAGACTCATTGGTGCTGTGGTGTT  
GGCAGTATCTGTGGCAATGCTTACCGCTTTCTTTCTTTCGAAGGACTGG  
ACGACGCTCTCCCCCAGAACCATCTGGGGATGATGGTGAAATGATGC  
AGGCAATAATGCTGGGAACGGTGGGAATGAAGGCAGAGGTGAAGGAG  
GAGGCGAGGATGACAGGCGCGCGTTGCACCCGGGAAGTGTGAATGTG  
TTTGATTATTAA

>VAND

ATGGCACACGGTGGCATCCATCTGAGGCAGAAGCGTAACTTCTGTCCT  
TTAACTGTCTCCACAGTTGCTGTGGTCTTTGTAGTCTTCATGGGTGTA  
CTCGTCAATTCGTTGGGTGGAGTCGCTGTCGCAGCAGACAGCGGTGG  
TGTTAAGCAGACCCCTTCGGAAACCGGTTTCGAGCGGTGGACAGCAAGA  
AGCAGTGGGGACCACTGAAGACTATGTCAACTCTTCGGCGATGGGCG  
GTGGCCAAGGCGACTCGTTAGCTGAAGATGATACAACCTCCGATGCGG  
CGGAGGGCGACGTTGACCCTTTTCCCGTGCTGGCGAATGAGGGGAAG  
TCGGAGGCGCGTGGCCCGTCGCTCGAGGAAAGAATCGAAGAACAGGG  
CACAAGACGACGTTACTCCTCTGTTCAAGAACCACAAGCGAAGGTGCC  
TAGCAAACGAACACAGAAACGCCACAGACTCATTGGTGCTGTGGTGTT  
GGCAGTATCTGTGGCAATGCTTACCGCTTTCTTTCTTTCGAAGGACTGG  
ACGACGCTCTCCCCCAGAACCATCTGGGGATGATGGTGAAATGATGC  
AGGCAATAATGCTGGGAACGGTGGGAATGAAGGCAGAGGTTACAGAG  
GCAGAGGTGAAGGAGGAGGCGAGGATGACAGGCGCGCGTTGCACCCG  
GAACGTGTGAATGTGTTTGATTATTAA

>TgCgCa1

ATGGCACACGGTGGCATCTATCTGAGGCAGAAGCGTAACTTCTGTCCT  
TTAACTGTCTCCACAGTTGCTGTGATCTTTGTAGTCTTCATGGGTGTA  
CTCGTCAATTCGTTGGGTGGAGTCGCTTTCGCAGCAGACAGCGGTGG  
TGTTAGGCAGACCCCTTCGGAAACCGGTTTCGAGCGGTGGACAGCAAG  
AAGCAGTGGGGACCACTGAAGACTATGTCAACTCTTCGGCGATGGGC  
GGTGGCCAAGGCGACTCGTTAGCTGAAGATGATGATACAGCCTCCGAT  
GCGGCGGAGGGCGACGTTGACCCTTTTCCCGCGCTGGCGAATGAGG

GGAAGTCGGAGGCGCGTGGCCCGTCGCTCGAGGAAAGAATCGAAGAA  
CAGGGCACAAGACGACGTTATTCCTCTGTTCAAGAACCACAAGCGAAG  
GTGCCTAGCAAACGAACACAGAAACGCCACAGACTCATTGGTGCTGTG  
GTGTTGGCAGTATCTGTGGCAATGCTTACCGCTTTCTTTCTTCGAAGG  
ACTGGACGACGCTCTCCCCAAGAACTATCTGGGGGTGGTGGTGGAAA  
TGATGCAGGCAATAATGCTGGGAACGGTGGGAATGAAGGCAGAGGTG  
ACGGAGGCAGAGGTGAAGGAGGAGGCGAGGATGACAGGCGCCCGTTG  
CACCCGGAACGTGTGAATGAGTTTGATTATTAA

>ARI

ATGGCACACGGTGGCATCTATCTGAGGCAGAAGCGTAACTTCTGTCCT  
TTAACTGTCTCCACAGTTGCTGTGATCTTTGTAGTCTTCATGGGTGTA  
CTCGTCAATTCGTTGGGTGGAGTCGCTTTCGCAGCAGACAGCGGTGG  
TGTTAGGCAGACCCCTTCGGAAACCGGTTTCGAGCGGTGGACAGCAAG  
AAGCAGTGGGGACCACTGAAGACTATGTCAACTCTTCGGCGATGGGC  
GGTGGCCAAGGCGACTCGTTAGCTGAAGATGATGATACAGCCTCCGAT  
GCGGCGGAGGGCGACGTTGACCCTTTTCCCGCGCTGGCGAATGAGG  
GGAAGTCGGAGGCGCGTGGCCCGTCGCTCGAGGAAAGAATCGAAGAA  
CAGGGCACAAGACGACGTTATTCCTCTGTTCAAGAACCACAAGCGAAG  
GTGCCTAGCAAACGAACACAGAAACGCCACAGACTCATTGGTGCTGTG  
GTGTTGGCAGTATCTGTGGCAATGCTTACCGCTTTCTTTCTTCGAAGG  
ACTGGACGACGCTCTCCCCAAGAACCATCTGGGGGTGGTGGTGGAAA  
TGATGCAGGCAATAATGCTGGGAACGGTGGGAATGAAGGCAGAGGTG  
AAGGAGGAGGCGAGGATGACAGGCGCCCGTTGCACCCGGAACGTGTG  
AATGAGTTTGATTATTAA

>TgCtPRC2

AGGCACACGGTGGCATCTATCTGAGGCAGAAGCGTAACTTCTGTCCTT  
TAACTGTCTCCACAGTTGCTGTGGTCTTTGTAGTCTTCATGGGTGTAC  
TCGTCAATTCGTTGGGTGGAGTCGCTGTTCGCAGCAGACAGCGGTGGT  
GTTAGGCAGACCCCTTCGGAAACCGGTTTCGAGCGGTGGACAGCAAGA  
AGCAGTGGGGACCACTGAAGACTATGTCAACTCTTCGGCGATGGGGC  
GTGGCCAAGGCGACTCGTTAGCTGAAGATGATACAACCTCCGATGCGG  
CGGAGGGCGACGTTGACCCTTTTCCCGCGCTGGCGAATGAGGGGAAG  
TCGGAGGCGCGTGGCCCGTCGCTCGAGGAAAGAATCGAAGAACAGGG  
CACAAGACGACGTTACTCCTCTGTTCAAGAACCACAAGCGAAGGTGCC

TAGCAAACGAACACAGAAACGCCACAGACTCATTGGTGCTGTGGTGTT  
GGCAGTATCTGTGGCAATGCTTACCGCTTTCTTTCTTTCGAAGGACTGG  
ACGACGCTCTCCCCAAGAACCATCTGGGGGTGGTGGTGGAAATGATG  
CAGGCAATAATGCTGGGAACGGTGGGAATGAAGGCAGAGGTGAAGGA  
GGCGAGGATGACAGGCGCCCGTTGCACCCGGGAAGTGTGAATGAGTT  
TGATTTTAA

>GAB2-2007-GAL-DOM2

ATGGCACACGGTGGCATCTATCTGAGGCAGAAGCGTAACTTCTGTCCT  
TTAACTGTCTCCACAGTTGCTGTGGTCTTTGTAGTCTTCATGGGTGTA  
CTCGTCAATTCGTTGGGTGGAGTCGCTGTCGCAGCAGACAGCGGTGG  
TGTTAGGCAGACCCCTTCGGAAACCGGTTTCGAGCGGTGGACAGCAAG  
AAGCAGTGGGGACCACTGAAGACTATGTCAACTCTTCGGCGATGGGC  
GGTGGCCAAGGCGACTCGTTAGCTGAAGATGATACAACCTCCGATGCG  
GCGGAGGGCGACGTTGACCCTTTTCCCGCGCTGGCGAATGAGGGGAA  
GTCGGAGGCGCGTGGCCCGTTCGCTCGAGGAAAGAATCGAAGAACAGG  
GCACAAGACGACGTTACTCCTCTGTTCAAGAACCACAAGCGAAGGTGC  
CTAGCAAACGAACACAGAAACGCCACAGACTCATTGGTGCTGTGGTGT  
TGGCAGTATCTGTGGCAATGCTTACCGCTTTCTTTCTTTCGAAGGACTG  
GACGACGCTCTCCCCAAGAACCATCTGGGGGTGGTGGTGGAAATGAT  
GCAGGCAATAATGCTGGGAACGGTGGGAATGAAGGCAGAGGTGAAGG  
AGGCGAGGATGACAGGCGCCCGTTGCACCCGGGAAGTGTGAATGAGT  
TTGATTTTAA

>TgCtCo5

ATGGCACACGGTGGCATCCATCTGAGGCAGAAGCGTAACTTCTGTCCT  
TTAACTGTCTCCACAGTTGCTGTGGTCTTTGTAGTCTTCATGGGTGTA  
CTCGTCAATTCGTTGGGTGGAGTCGCTGTCGCAGCAGACAGCGATGG  
TGTTAAGCAGACCCCTTCGGAAACCGGTTTCGAGCGGTGGACAGCAAGA  
AGCAGTGGGGACCACTGAAGACTATGTCAACTCTTCGGCGATGGGCG  
GTGGCCAAGGCGACTCGTTAGCTGAAGATGATACAACCTCCGATGCGG  
CGGAGGGCGACGTTGACCCTTTTCCCGTGCTGGCGAATGAGGGGAAAG  
TCGGAGGCGCGTGGCCCGTTCGCTCGAGGAAAGAATCGAAGAACAGGG  
CACAAGACGACGTTACTCCTCTGTTCAAGAACCACAAGCGAAGGTGCC  
TAGCAAACGAACACAGAAACGCCACAGACTCATTGGTGCTGTGGTGTT  
GGCAGTATCTGTGGCAATGCTTACCGCTTTCTTTCTTTCGAAGGACTGG

ACGACGCTCTCCCCAGAACCATCTGGGGATGATGGTGGAAATGATGC  
AGGCAATAATGCTGGGAACGGTGGGAATGAAGGCAGAGGTGAAGGAG  
GCGAGGATGACAGGCGCGCGTTGCACCCGGAACGTGTGAATGTGTTT  
GATTATTAA

>TgCatJpOk1

GTAGCGTGCTTGTGGCGACTACCTTTTTTTCTTGGGAGTGTTCGGCG  
AAATGGCACACGGTGGCATCCATCTGAGGCAGAAGCGTAACTTCTGTC  
CTGTAAGTGTCTCCACAGTTGCTGTGGTCTTTGTAGTCTTCATGGGTG  
TACTCGTCAATTCGTTGGGTGGAGTCGCTGTCGCAGCAGACAGCGGT  
GGTGTTAAGCAGACCCCTTCGGAAACCGGTTTCGAGCGGTGGACAGCA  
AGAAGCAGTGGGGACCACTGAAGACTATGTCAACTCTTCGGCGATGGG  
CGGTGGCCAAGGCGACTCGTCAGCTGAAGATGATAACAACCTCCGAAGC  
GGCGGAGGGCGACGTTGACCCTTTTCCCGTGCTGGCGAATGAGGGGA  
AGTCGGAGGCGCGTGGCCCGTCGCTCGAGGAAAGAATCGAAGAACAG  
GGCACAAGACGACGTTACTCCTCTGTTCAAGAACCACAAGCGAAGGTG  
CCTAGCAAACGAACACAGAAACGCCACAGACTCATTGGTGCTGTGGTG  
TTGGCAGTATCTGTGGCAATGCTTACCGCTTTCTTTCTTCGAAGGACT  
GGACGACGCTCTCCCCAAGAACCATCTGGGGATGGTGGTGGAAATGA  
TGCAGGCAATAATGCTGGGAACGGTGGGAATGAAGGCAGAGGTTACG  
GAGGCAGAGGTGAAGGAGGAGCCGAGGATGACAGGCGCCCGTTGCAC  
CCGGAACGTGTGAATGTGTTTATTATTAAAGATGAAAACAGGGGGTGC  
TATGC

>TgCatJpOk2

TGCTTGTGGCGACTACCTTTTTTTCTTGGGAGTGTTCGGCGAAATGG  
CACACGGTGGCATCCATCTGAGGCAGAAGCGTAACTTCTGTCTGTAA  
CTGTCTCCACAGTTGCTGTGGTCTTTGTAGTCTTCATGGGTGTACTCG  
TCAATTCGTTGGGTGGAGTCGCTGTCGCAGCAGACAGCGGTGGTGT  
AAGCAGACCCCTTCGGAAACCGGTTTCGAGCGGTGGACAGCAAGAAGCA  
GTGGGGACCACTGAAGACTATGTCAACTCTTCGGCGATGGGCGGTGG  
CCAAGGCGACTCGTCAGCTGAAGATGATAACAACCTCCGAAGCGGCGGA  
GGGCGACGTTGACCCTTTTCCCGTGCTGGCGAATGAGGGGAAGTCGG  
AGGCGCGTGGCCCGTCGCTCGAGGAAAGAATCGAAGAACAGGGCACA  
AGACGACGTTACTCCTCTGTTCAAGAACCACAAGCGAAGGTGCCTAGC  
AAACGAACACAGAAACGCCACAGACTCATTGGTGCTGTGGTGTGGCA



GTATCTGTGGCAATGCTTACCGCTTTCTTTCTTCGAAGGACTGGACGA  
CGCTCTCCCAAGAACCATCTGGGGATGGTGGTGGAAATGATGCAGG  
CAATAATGCTGGGAACGGTGGGAATGAAGGCAGAGGTTACGGAGGCA  
GAGGTGAAGGAGGAGCCTAGGATGACAGGCGCCCGTTGCACCCGGAA  
CGTGTGAATGTGTTTGATTATTAA

>TgCatJpOk3

CTTGTGGCGACTACCTTTTTTTCTTGGGAGTGTCGGCGAAATGGCA  
CACGGTGGCATCTATCTGAGGCAGAAGCGTAACTTCTGTCCTTTAACT  
GTCTCCACAGTTGCTGTGGTCTTTGTAGTCTTCATGGGTGTACTCGTC  
AATTCGTTGGGTGGAGTCGCTGTTCGACAGACAGCGGTGGTGTAG  
GCAGACCCCTTCGGAAACCGGTTTCGAGCGGTGGACAGCAAGAAGCAG  
TGGGGACCACTGAAGACTATGTCAACTCTTCGGCGATGGGCGGTGGC  
CAAGGCGACTCGTTAGCTGAAGATGATAACAACCTCCGATGCGGCGGAG  
GGCGACGTTGACCCTTTTCCCGCGCTGGCGAATGAGGGGAAGTCGGA  
GGCGCGTGGCCCGTCGCTCGAGGAAAGAATCGAAGAACAGGGCACA  
GACGACGTTACTCCTCTGTTCAAGAACCACAAGCGAAGGTGCCTAGCA  
AACGAACACAGAAACGCCACAGACTCATTGGTGCTGTGGTGTGGCAG  
TATCTGTGGCAATGCTTACCGCTTTCTTTCTTCGAAGGACTGGACGAC  
GCTCTCCCAAGAACCATCTGGGGGTGGTGGTGGAAATGATGCAGGC  
AATAATGCTGGGAACGGTGGGAATGAAGGCAGAGGTGAAGGAGGCGA  
GGATGACAGGCGCCCGTTGCACCCGGGAAGTGTGAATGAGTTTGATT  
TTTAAAGATGAAAACAGGGGGTCTATGCGCCACT

>TgCatJpOk4

GACTACCTTTTTTTCTTGGGAGTGTCGGCGAAATGGCACACGGTGGC  
ATCTATCTGAGGCAGAAGCGTAACTTCTGTCCTTTAACTGTCTCCACA  
GTTGCTGTGGTCTTTGTAGTCTTCATGGGTGTACTCGTCAATTCGTTG  
GGTGGAGTCGCTGTTCGACAGACAGCGGTGGTGTAGGCAGACCCC  
TTCGGAAACCGGTTTCGAGCGGTGGACAGCAAGAAGCAGTGGGGACCA  
CTGAAGACTATGTCAACTCTTCGGCGATGGGCGGTGGCCAAGGCGAC  
TCGTTAGCTGAAGATGATAACAACCTCCGATGCGGCGGAGGGCGACGTT  
GACCCTTTTCCCGCGCTGGCGAATGAGGGGAAGTCGGAGGCGCGTGG  
CCCGTCGCTCGAGGAAAGAATCGAAGAACAGGGCACAAGACGACGTTA  
CTCCTCTGTTCAAGAACCACAAGCGAAGGTGCCTAGCAAACGAACACA  
GAAACGCCACAGACTCATTGGTGCTGTGGTGTGGCAGTATCTGTGG

CAATGCTTACCGCTTTCTTTCTTCGAAGGACTGGACGACGCTCTCCCC  
AAGAACCATCTGGGGGTGGTGGTGGAAATGATGCAGGCAATAATGCT  
GGGAACGGTGGGAATGAAGGCAGAGGTGAAGGAGGCGAGGATGACAG  
GCGCCCGTTGCACCCGGGAAGTGTGAATGAGTTTGATTTTTTAAAGATG  
AAAACAGGG

>TgCatJpTy1/k-3

ACAGCAGGAAAACAGCTTCGTGGTGCCACGTAGCGTGCTTGTGGCG  
ACTACCTTTTTTTCTTGGGAGTGTGCGCGAAATGGCACACGGTGGCAT  
CTATCTGAGGCAGAAGCGTAACTTCTGTCCTTTAACTGTCTCCACAGT  
TGCTGTGGTCTTTGTAGTCTTCATGGGTGTACTCGTCAATTCGTTGG  
GTGGAGTCGCTGTCGCAGCAGACAGCGGTGGTGTTAGGCAGACCCCT  
TCGGAAACCGGTTTCGAGCGGTGGACAGCAAGAAGCAGTGGGGACCAC  
TGAAGACTATGTCAACTCTTCGGCGATGGGCGGTGGCCAAGGCGACT  
CGTTAGCTGAAGATGATAACAACCTCCGATGCGGCGGAGGGCGACGTT  
GACCCTTTTCCCGCGCTGGCGAATGAGGGGAAGTCGGAGGCGCGTGG  
CCCGTCGCTCGAGGAAAGAATCGAAGAACAGGGCACAAGACGACGTTA  
CTCCTCTGTTCAAGAACCACAAGCGAAGGTGCCTAGCAAACGAACACA  
GAAACGCCACAGACTCATTGGTGCTGTGGTGTGGCAGTATCTGTGG  
CAATGCTTACCGCTTTCTTTCTTCGAAGGACTGGACGACGCTCTCCCC  
AAGAACCATCTGGGGGTGGTGGTGGAAATGATGCAGGCAATAATGCT  
GGGAACGGTGGGAATGAAGGCAGAGGTGAAGGAGGCGAGGATGACAG  
GCGCCCGTTGCACCCGGGAAGTGTGAATGAGTTTGATTTTTTAAAGATG  
AAAACAGGGGGTCTATGCGCCACTGGGGCACTCTGTGTCTTGTAGTC  
GATGC

>TgCatJpGi1/TaJ

GTGGTGCCACGTAGCGTGCTTGTGGCGACTACCTTTTTTTCTTGGG  
AGTGTGCGCGAAATGGCACACGGTGGCATCCATCTGAGGCAGAAGCG  
TAACTTCTGTCTTTAACTGTCTCCACAGTTGCTGTGGTCTTTGTAGT  
TTTCATGGGTGTACTCGTCAATTCGTTGGGTGGAGTCGCTGTCGCAG  
CAGACAGCGATGGTGTAAAGCAGACCCCTTCGGAAACCGGTTTCGAGCG  
GTGGACAGCAAGAAGCAGTGGGGACCACTGAAGACTATGTCAACTCTT  
CGGCGATGGGCGGTGGCCAAGGCGACTCGTTAGCTGAAGATGATAACA  
ACCTCCGATGCGGCGGAGGGCGACGTTGACCCTTTTCCCGTGCTGGC  
GAATGAGGGGAAGTCGGAGGCGCGTGGCCCGTCGCTCGAGGAAAGAA

TCGAAGAACAGGGCACAAGACGACGTTACTCCTCTGTTCAAGAACCAC  
AAGCGAAGGTGCCTAGCAAACGAACACAGAAACGCCACAGACTCATTG  
GTGCTGTGGTGTGGCAGTATCTGTGGCAATGCTTACCGCTTTCTTT  
CTTCGAAGGACTGGACGACGCTCTCCCCAGAACCATCTGGGGATGG  
TGGTGGAAATGATGCAGGCAATAATGCTGGGAACCGTGGGAATGAAG  
GCAGAGGTTACGGAGGCAGAGGTGAAGGAGGAGGCGAGGATGACAGG  
CGCGCGTTGCACCCGGAACGTGTGAATGTGTTTGATTATTAAAGATGA  
AAACAGGGGGTCTATGCGCCACTGGGGCACTCTGT

>TgGoatJpOk1

AATGGCACACGGTGGCATCCATCTGAGGCAGAAGCGTAACTTCTGTCC  
TGTAAGTGTCTCCACAGTTGCTGTGGTCTTTGTAGTCTTCATGGGTGT  
ACTCGTCAATTCGTTGGGTGGAGTCGCTGTTCGCAGCAGACAGCGGTG  
GTGTTAAGCAGACCCCTTCGGAAACCGGTTTCGAGCGGTGGACAGCAA  
GAAGCAGTGGGGACCACTGAAGACTATGTCAACTCTTCGGCGATGGG  
CGGTGGCCAAGGCGACTCGTCAGCTGAAGATGATAACAACCTCCGAAGC  
GGCGGAGGGCGACGTTGACCCTTTTCCCGTGCTGGCGAATGAGGGGA  
AGTCGGAGGCGCGTGGCCCGTCGCTCGAGGAAAGAATCGAAGAACAG  
GGCACAAGACGACGTTACTCCTCTGTTCAAGAACCACAAGCGAAGGTG  
CCTAGCAAACGAACACAGAAACGCCACAGACTCATTGGTGTGTGGTGT  
TTGGCAGTATCTGTGGCAATGCTTACCGCTTTCTTTCTTCGAAGGACT  
GGACGACGCTCTCCCCAAGAACCATCTGGGGATGGTGGTGGAAATGA  
TGCAGGCAATAATGCTGGGAACGGTGGGAATGAAGGCAGAGGTTACG  
GAGGCAGAGGTGAAGGAGGAGCCGAGGATGACAGGCGCCCGTTGCAC  
CCGGAACGTGTGAATGTGTTTGATTATTAAAGATGAAAACAGGGGGGT  
CTATGCGCCACTGGG

>TgGoatJpOk2

TCTTGGGAGTGTTCGGCGAAATGGCACACGGTGGCATCCATCTGAGGC  
AGAAGCGTAACTTCTGTCCGTAACTGTCTCCACAGTTGCTGTGGTCT  
TTGTAGTCTTCATGGGTGTACTCGTCAATTCGTTGGGTGGAGTCGCT  
GTCGCAGCAGACAGCGGTGGTGTAAAGCAGACCCCTTCGGAAACCGG  
TTCGAGCGGTGGACAGCAAGAAGCAGTGGGGACCACTGAAGACTATGT  
CAACTCTTCGGCGATGGGCGGTGGCCAAGGCGACTCGTCAGCTGAAG  
ATGATAACAACCTCCGAAGCGGCGGAGGGCGACGTTGACCCTTTTCCCG  
TGCTGGCGAATGAGGGGAAGTCGGAGGCGCGTGGCCCGTCGCTCGA

GGAAAGAATCGAAGAACAGGGCACAAGACGACGTTACTCCTCTGTTCA  
AGAACCACAAGCGAAGGTGCCTAGCAAACGAACACAGAAACGCCACAG  
ACTCATTGGTGCTGTGGTGTGGCAGTATCTGTGGCAATGCTTACCGC  
TTTCTTTCTTCGAAGGACTGGACGACGCTCTCCCCAAGAACCATCTGG  
GGATGGTGGTGGAAATGATGCAGGCAATAATGCTGGGAACGGTGGGA  
ATGAAGGCAGAGGTTACGGAGGCAGAGGTGAAGGAGGAGCCGAGGAT  
GACAGGCGCCCGTTGCACCCGGAACGTGTGAATGTGTTTGATTATTAA  
A

>TgGoatJpOk3

GAAATGGCACACGGTGGCATCCATCTGAGGCAGAAGCGTAACTTCTGT  
CCTGTAAGTGTCTCCACAGTTGCTGTGGTCTTTGTAGTCTTCATGGGT  
GTACTCGTCAATTCGTTGGGTGGAGTCGCTGTTCGCAGCAGACAGCGG  
TGGTGTAAAGCAGACCCCTTCGGAAACCGGTTTCGAGCGGTGGACAGC  
AAGAAGCAGTGGGGACCACTGAAGACTATGTCAACTCTTCGGCGATGG  
GCGGTGGCCAAGGCGACTCGTCAGCTGAAGATGATAACAACCTCCGAAG  
CGGCGGAGGGCGACGTTGACCCTTTTCCCGTGCTGGCGAATGAGGGG  
AAGTCGGAGGCGCGTGGCCCGTCGCTCGAGGAAAGAATCGAAGAACA  
GGGCACAAGACGACGTTACTCCTCTGTTCAAGAACCACAAGCGAAGGT  
GCCTAGCAAACGAACACAGAAACGCCACAGACTCATTGGTGCTGTGGT  
GTTGGCAGTATCTGTGGCAATGCTTACCGCTTTCTTTCTTCGAAGGAC  
TGGACGACGCTCTCCCCAAGAACCATCTGGGGATGGTGGTGGAAATG  
ATGCAGGCAATAATGCTGGGAACGGTGGGAATGAAGGCAGAGGTTAC  
GGAGGCAGAGGTGAAGGAGGAGCCGAGGATGACAGGCGCCCGTTGCA  
CCCGGAACGTGTGAATGTGTTTGATTATTAAAGATGAAAACAGGGGGT  
CTATGCGCCACTGGGGCAC

>TgGoatJpOk4

GTTGGCGACTACCTTTTTTTCTTGGGAGTGTTCGGCGAAATGGCACAC  
GGTGGCATCCATCTGAGGCAGAAGCGTAACTTCTGTCTGTAAGTGT  
TCCACAGTTGCTGTGGTCTTTGTAGTCTTCATGGGTGTACTCGTCAAT  
TCGTTGGGTGGAGTCGCTGTTCGCAGCAGACAGCGGTGGTGTAAAGCA  
GACCCCTTCGGAAACCGGTTTCGAGCGGTGGACAGCAAGAAGCAGTGG  
GGACCACTGAAGACTATGTCAACTCTTCGGCGATGGGCGGTGGCCAA  
GGCGACTCGTCAGCTGAAGATGATAACAACCTCCGAAGCGGCGGAGGG  
CGACGTTGACCCTTTTCCCGTGCTGGCGAATGAGGGGAAGTCGGAGG

CGCGTGGCCCGTCGCTCGAGGAAAGAATCGAAGAACAGGGCACAAGA  
CGACGTTACTCCTCTGTTCAAGAACCACAAGCGAAGGTGCCTAGCAAA  
CGAACACAGAAACGCCACAGACTCATTGGTGCTGTGGTGTGGCAGTA  
TCTGTGGCAATGCTTACCGCTTTCTTTCTTTCGAAGGACTGGACGACGC  
TCTCCCAAGAACCATCTGGGGATGGTGGTGGAAATGATGCAGGCAAT  
AATGCTGGGAACGGTGGGAATGAAGGCAGAGGTTACGGAGGCAGAGG  
TGAAGGAGGAGCCGAGGATGACAGGCGCCCGTTGCACCCGGAACGTG  
TGAATGTGTTTGATTATTAAGATGAAAACAGGGGGTCTATGCGC

>TgGoatJpOk5

TGTTGGGCGACTACCTTTTTTTCTTGGGAGTGTCGGCGAAATGGCAC  
ACGGTGGCATCCATCTGAGGCAGAAGCGTAACTTCTGTCCTGTAAGT  
TCTCCACAGTTGCTGTGGTCTTTGTAGTCTTCATGGGTGTACTCGTCA  
ATTCGTTGGGTGGAGTCGCTGTCGCAGCAGACAGCGGTGGTGTAAAG  
CAGACCCCTTCGGAAACCGGTTTCGAGCGGTGGACAGCAAGAAGCAGT  
GGGGACCACTGAAGACTATGTCAACTCTTCGGCGATGGGCGGTGGCC  
AAGGCGACTCGTCAGCTGAAGATGATAACAACCTCCGAAGCGGCGGAGG  
GCGACGTTGACCCTTTTCCCGTGCTGGCGAATGAGGGGAAGTCGGAG  
GCGCGTGGCCCGTCGCTCGAGGAAAGAATCGAAGAACAGGGCACAAG  
ACGACGTTACTCCTCTGTTCAAGAACCACAAGCGAAGGTGCCTAGCAA  
ACGAACACAGAAACGCCACAGACTCATTGGTGCTGTGGTGTGGCAGT  
ATCTGTGGCAATGCTTACCGCTTTCTTTCTTTCGAAGGACTGGACGACG  
CTCTCCCAAGAACCATCTGGGGATGGTGGTGGAAATGATGCAGGCA  
ATAATGCTGGGAACGGTGGGAATGAAGGCAGAGGTTACGGAGGCAGA  
GGTGAAGGAGGAGCCGAGGATGACAGGCGCCCGTTGCACCCGGAACG  
TGTGAATGTGTTTGATTATTAAGATGAAAACAGGGGGTCTATGCGC  
CACTGGGGGC

>TgGoatJpOk6

TTACAGCAGGAAAACAGCTTCGTGGTGCCACGTAGCGTGCTTGTTGGC  
GACTACCTTTTTTTCTTGGGAGTGTCGGCGAAATGGCACACGGTGGC  
ATCTATCTGAGGCAGAAGCGTAACTTCTGTCCTTTAACTGTCTCCACA  
GTTGCTGTGGTCTTTGTAGTCTTCATGGGTGTACTCGTCAATTCGTTG  
GGTGGAGTCGCTGTCGCAGCAGACAGCGGTGGTGTAGGCAGACCCC  
TTCGGAAACCGGTTTCGAGCGGTGGACAGCAAGAAGCAGTGGGGACCA  
CTGAAGACTATGTCAACTCTTCGGCGATGGGCGGTGGCCAAGGCGAC

TCGTTAGCTGAAGATGATAACAACCTCCGATGCGGCGGAGGGCGACGTT  
GACCCTTTTCCC GCGCTGGCGAATGAGGGGAAGTCGGAGGCGCGTGG  
CCCGTCGCTCGAGGAAAGAATCGAAGAACAGGGCACAAGACGACGTTA  
CTCCTCTGTTCAAGAACCACAAGCGAAGGTGCCTAGCAAACGAACACA  
GAAACGCCACAGACTCATTGGTGCTGTGGTGTGGCAGTATCTGTGG  
CAATGCTTACCGCTTTCTTTCTTCGAAGGACTGGACGACGCTCTCCCC  
AAGAACCATCTGGGGGTGGTGGTGGAAATGATGCAGGCAATAATGCT  
GGGAACGGTGGGAATGAAGGCAGAGGTGAAGGAGGCGAGGATGACAG  
GCGCCCGTTGCACCCGGGAAGTGTGAATGAGTTTGATTTTAAAGATG  
AAAACCGGGGGTCTATGCTTTTCGGGGGCACTCTGTGTCTGTATTTC  
TATGCAGTCCCCGCTCGTGTCTCGTCCGTCTTTGAGCANCCAGTGCTTCC  
TCCATTACCGCTCTAAATAGTGCTTAATTACGTACCATCCCTGCCTGAA  
TTACGAGTCCGTTAATGAGGTGACTCATGAACGGAAGATTCATGCGTT  
TTGATACCTG

>TgGoatJpOk7

TACAGCAGGAAAACAGCTTCGTGGTgCCACGTAGCGTGCTTGTTGGCG  
ACTACCTTTTTTTTCTTGGGAGTGTGCGGCGAAATGGCACACGGTGGCAT  
CTATCTGAGGCAGAAGCGTAACTTCTGTCCTTTAACTGTCTCCACAGT  
TGCTGTGGTCTTTGTAGTCTTCATGGGTGTACTCGTCAATTCGTTGG  
GTGGAGTCGCTGTCGCAGCAGACAGCGGTGGTGTAGGCAGACCCCT  
TCGGAAACCGGTTTCGAGCGGTGGACAGCAAGAAGCAGTGGGGACCAC  
TGAAGACTATGTCAACTCTTCGGCGATGGGCGGTGGCCAAGGCGACT  
CGTTAGCTGAAGATGATAACAACCTCCGATGCGGCGGAGGGCGACGTT  
GACCCTTTTCCC GCGCTGGCGAATGAGGGGAAGTCGGAGGCGCGTGG  
CCCGTCGCTCGAGGAAAGAATCGAAGAACAGGGCACAAGACGACGTTA  
CTCCTCTGTTCAAGAACCACAAGCGAAGGTGCCTAGCAAACGAACACA  
GAAACGCCACAGACTCATTGGTGCTGTGGTGTGGCAGTATCTGTGG  
CAATGCTTACCGCTTTCTTTCTTCGAAGGACTGGACGACGCTCTCCCC  
AAGAACCATCTGGGGGTGGTGGTGGAAATGATGCAGGCAATAATGCT  
GGGAACGGTGGGAATGAAGGCAGAGGTGAAGGAGGCGAGGATGACAG  
GCGCCCGTTGCACCCGGGAAGTGTGAATGAGTTTGATTTTAAAGATG  
AAAACAGGGGGTCTATGCGCCACTGGGGCACTCTGTGTCTTGTA

>TgGoatJpOk8

TACAGCAGGAAAACAGCTTCGTGGTGCCACGTAGCGTGCTTGTTGGC

GACTACCTTTTTTTCTTGGGAGTGTCGGCGAAATGGCACACGGTGGC  
ATCTATCTGAGGCAGAAGCGTAACTTCTGTCCTTTAACTGTCTCCACA  
GTTGCTGTGGTCTTTGTAGTCTTCATGGGTGTACTCGTCAATTCGTTG  
GGTGGAGTCGCTGTCGCAGCAGACAGCGGTGGTGTTAGGCAGACCCC  
TTCGGAAACCGGTTTCGAGCGGTGGACAGCAAGAAGCAGTGGGGACCA  
CTGAAGACTATGTCAACTCTTCGGCGATGGGCGGTGGCCAAGGCGAC  
TCGTTAGCTGAAGATGATAACAACCTCCGATGCGGCGGAGGGCGACGTT  
GACCCTTTTCCCGCGCTGGCGAATGAGGGGAAGTCGGAGGCGCGTGG  
CCCGTCGCTCGAGGAAAGAATCGAAGAACAGGGCACAAGACGACGTTA  
CTCCTCTGTTCAAGAACCACAAGCGAAGGTGCCTAGCAAACGAACACA  
GAAACGCCACAGACTCATTGGTGCTGTGGTGTGGCAGTATCTGTGG  
CAATGCTTACCGCTTTCTTTCTTCGAAGGACTGGACGACGCTCTCCCC  
AAGAACCATCTGGGGGTGGTGGTGGAAATGATGCAGGCAATAATGCT  
GGGAACGGTGGGAATGAAGGCAGAGGTGAAGGAGGCGAGGATGACAG  
GCGCCCGTTGCACCCGGGAAGTGTGAATGAGTTTGATTTTTAAAGATG  
AAAACAGGGGGTCTATGCGCCACTGGGGCACTCTGTGT

>TgGoatJpOk9

GCAGGAAAACAGCTTCGTGGTGCCACGTAGCGTGCTTGTGGCGACT  
ACCTTTTTTTCTTGGGAGTGTCGGCGAAATGGCACACGGTGGCATCT  
ATCTGAGGCAGAAGCGTAACTTCTGTCCTTTAACTGTCTCCACAGTTG  
CTGTGGTCTTTGTAGTCTTCATGGGTGTACTCGTCAATTCGTTGGGT  
GGAGTCGCTGTCGCAGCAGACAGCGGTGGTGTTAGGCAGACCCCTTC  
GGAAACCGGTTTCGAGCGGTGGACAGCAAGAAGCAGTGGGGACCACTG  
AAGACTATGTCAACTCTTCGGCGATGGGCGGTGGCCAAGGCGACTCG  
TTAGCTGAAGATGATAACAACCTCCGATGCGGCGGAGGGCGACGTTGAC  
CCTTTTCCCGCGCTGGCGAATGAGGGGAAGTCGGAGGCGCGTGGCCC  
GTCGCTCGAGGAAAGAATCGAAGAACAGGGCACAAGACGACGTTACTC  
CTCTGTTCAAGAACCACAAGCGAAGGTGCCTAGCAAACGAACACAGAA  
ACGCCACAGACTCATTGGTGCTGTGGTGTGGCAGTATCTGTGGCAAT  
GCTTACCGCTTTCTTTCTTCGAAGGACTGGACGACGCTCTCCCCAAGA  
ACCGTGGGAATGAAGGCAGAGGTGAAGGAGGCGAGGATGACAGGCGC  
CCGTTGCACCCGGGAAGTGTGAATGAGTTTGATTTTTAAAGATGAAA  
CAGGGGGTCTATGCGCCACTGGGGCACTCTGTGT

>TgGoatJpOk10

CACGTAGCGTGCTTGTTGGCGACTACCNTTTTTTCTTGGGAGTGTCG  
GCGAAATGGCACACGGTGGCATCTATCTGAGGCAGAAGCGTAACTTCT  
GTCCTTTAACTGTCTCCACAGTTGCTGTGGTCTTTGTAGTCTTCATGG  
GTGTAICTCGTCAATTCGTTGGGTGGAGTCGCTGTTCGCAGCAGACAGC  
GGTGGTGTAGGCAGACCCCTTCGGAAACCGGTTTCGAGCGGTGGACA  
GCAAGAAGCAGTGGGGACCACTGAAGACTATGTCAACTCTTCGGCGAT  
GGGCGGTGGCCAAGGCGACTCGTTAGCTGAAGATGATAACAACCTCCG  
ATGCGGCGGAGGGCGACGTTGACCCTTTTCCCGCGCTGGCGAATGAG  
GGGAAGTCGGAGGCGCGTGGCCCGTCGCTCGAGGAAAGAATCGAAGA  
ACAGGGCACAAGACGACGTTACTCCTCTGTTCAAGAACCACAAGCGAA  
GGTGCCTAGCAAACGAACACAGAAACGCCACAGACTCATTGGTGCTGT  
GGTGTGGCAGTATCTGTGGCAATGCTTACCGCTTTCTTTCTTCGAAG  
GACTGGACGACGCTCTCCCAAGAACCATCTGGGGGGTGGTGGTNGG  
AAATGATGCAGGCAATAATGCTGGGAACGGTGGGAATGAAGGCAGAG  
GTGAAGGAGGCGAGGATGACAGGCGCCCCGTTGCACCCGGAAGTGT  
GAATGAGTTTGATTTTTTAAAG

>TgGoatJpOk11

GCAGGAAAACAGCTTCGTGGTGCCACGTAGCGTGCTTGTTGGCGACT  
ACCTTTTTTTCTTGGGAGTGTCGGCGAAATGGCACACGGTGGCATCC  
ATCTGAGGCAGAAGCGTAACTTCTGTCCTTTAACTGTCTCCACAGTTG  
CTGTGGTCTTTGTAGTTTTTCATGGGTGTACTCGTCAATTCGTTGGGT  
GGAGTCGCTGTTCGCAGCAGACAGCGATGGTGTTAAGCAGACCCCTTC  
GGAAACCGGTTTCGAGCGGTGGACAGCAAGAAGCAGTGGGGACCACTG  
AAGACTATGTCAACTCTTCGGCGATGGGCGGTGGCCAAGGCGACTCG  
TTAGCTGAaGATGATAACAACCTCCGATGCGGCGGA<sub>g</sub>GGCGACGTTGAC  
CCTTTTCCCGTGCTGGCGAATGAGGGGAAGTCGGAGGCGCGTGGCCC  
GTCGCTCGAGGAAAGAATCGAAGAACAGGGCACAAGACGACGTTACTC  
CTCTGTTCAAGAACCACAAGCGAAGGTGCCTAGCAAACGAACACAGAA  
ACGCCACAGACTCATTGGTGCTGTGGTGTGGCAGTATCTGTGGCAAT  
GCTTACCGCTTTCTTTCTTCGAAGGACTGGACGACGCTCTCCCCCAGA  
ACCATCTGGGGATGGTGGTGGAAATGATGCAGGCAATAATGCTGGGA  
ACCGTGGGAATGAAGGCAGAGGTTACGGAGGCAGAGGTGAAGGAGGA  
GGCGAGGATGACAGGCGCGCGTTCACCCGGAACGTGTGAATGTGTT  
TGATTATTAAAGATGAAAACAGGGGGTCTATGCGCCACTGGGGCACTC



TGTGTCTTG

Dense granule protein 7 (GRA7)

>GT1

ATGGCCCGACACGCAATTTTTTCCGCGCTTTGTGTTTTAGGCCTGGT  
GGCGGCGGCTTTGCCCCAGTTCGCTACCGCGGCCACCGCGTCAGATG  
ACGAACTGATGAGTCGAATCCGAAATTCTGACTTTTTTCGATGGTCAAG  
CACCCGTTGACAGTCTCAGACCGACGAACGCCGGTGTCTGACTCGAAAG  
GGACCGACGATCACCTCACCACCAGCATGGATAAGGCATCTGTAGAGA  
GTCAGCTTCCGAGAAGAGAGCCATTGGAGACGGAGCCAGATGAACAAG  
AAGAAGTTCATTTTCAGGAAGCGAGGCGTCCGTTCCGACGCTGAAGTGA  
CTGACGACAACATCTACGAGGAGCACACTGATCGTAAGGTGGTTCCGA  
GGAAGTCGGAGGGCAAGCGAAGCTTCAAAGACTTGCTGAAGAAGCTC  
GCGCTGCCGGCTGTTGGTATGGGTGCATCGTATTTTGCCGCTGATAG  
ACTTGTGCCGGAACAAACAGAGGAGCAACAGAGAGGGCGACGAACCCCT  
AACCACCGGCCAGAATGTGGGCACTGTGTTAGGCTTCGCAGCGCTTG  
CTGCTGCCGCAGCGTTCCTTGGCATGGGTCTCACGAGGACGTACCGA  
CATTTTTCCCCACGCAAAAACAGATCACGGCAGCCTGCACTCGAGCAA  
GAGGTGCCTGAATCAGGCGAAGATGGGGAGGATGCCCGCCATGTCCC  
GAACGCGCCTGAGAGGCAGACAGACACAGAAGAGTGA

>ME49

ATGGCCCGACACGCAATTTTTTTCGCGCTTTGTGTTTTAGGCCTGGT  
GGCGGCGGCTTTGCCCCAGTTCGCTACCGCGGCCACCGCGTCAGATG  
ACGAACTGATGAGTCGAATCCGAAATTCTGACTTTTTTCGATGGTCAAG  
CACCCGTTGACAGTCTCAGACCGACGAACGCCGGTGTCTGACTCGAAAG  
GGACCGACGATCACCTCACCACCAGCATGGATAAGGCATCTGTAGAGA  
GTCAGCTTCCGAGAAGAGAGCCATTGGAGACGGAGCCAGATGAACAAG  
AAGAAGTTCATTTTCAGGAAGCGAGGCGTCCGTTCCGACGCTGAAGTGA  
CTGACGACAACATCTACGAGGAGCACACTGATCGTAAAGTGGTTCCGA  
GGAAGTCGGAGGGCAAGCGAAGCTTCAAAGACTTGCTGAAGAAGCTC  
GCGCTGCCGGCTGTTGGTATGGGTGCATCGTATTTTGCCGCTGATAG  
AATTCTGCCGGAACAAACAGAGCAGCAACAGACAGGCGAAGAACCCCT  
AACCACCGGCCAGAATGTGAGCACTGTGTTAGGCTTCGCAGCGCTTGC  
TGCTGCCGCAGCGTTCCTTGGCATGGGTCTCACGAGGACGTACCGAC  
ATTTTTCCCCACGCAAAAACAGATCACGGCAGCCTGCACTCGAGCAAG  
AGGTGCCTGAATCAGGCAAAGATGGGGAGGATGCCCGCCAGTAG

>VEG

ATGGCCCGACACGCAATTTTTTTTCGCGCTTTGTGTTTTAGGCCTGGT  
GGCGGCGGCTTTGCCCCAGTTCGCTACCGCGGCCACCGCGTCGGATG  
ACGAACTGATGAGTCGAATCCGAAATTCTGACTTTTTTCGATGGTCAAG  
CACCCGTTGACAGTCTCAGACCGACGAACGCCGGTGTCTGACTCGAAAG  
GGACCGACGATCACCTCACCACCAGCATGGATAAGGCATCTGTAGAGA  
GTCAGCTTCCGAGAAGAGAGCCATTGGAGACGGAGCCAGATGAACAAG  
AAGAAGTTCATTTTCAGGAAGCGAGGCGTCGGTCCGACGCTGAAGTG  
ACTGACGACCACATCTACGAGGAGAACACTGATCGTAAAGTGGTTCCG  
AGGAAGTCGGAGGGCAAGCGAAGCTTCAAAGACTTGCTGAAGAAGCT  
CGCGCTGCCGGCTGTTGGTATGGGTGCATCGTATTTTGCCGCTGATA  
GAATTCTGCCGGAACATAACAGAGCAGCAACAGACAGGCGACGAACCCC  
TATCCACCGGCCAGAATGTGAGCACTGTGATAGGCTTCGCAGCGCTTG  
CTGCTGCCGTAGCGTTCCTTGGCCTGGGTATCAAGAGGACGTACCGAC  
ATTTTTTCCCCACGCAAAAACAGATCACGGCAGCCTGCACCCGAGCACG  
AGGTGCCTGAATCAGGCGAAGATAGGGAGGATGCCCCGCCATGTCCCG  
AACGCGCCTGAGAGGCAGAGAGACACAGAAGAGTGA

>MAS

ATGGCCCGACACGCAATTTTTTTTCGCGCTTTGTGTTTTAGGCCTGGT  
GGCGGCGGCTTTGCCCCAGTTCGCTACCGCGGCCACCGCGTCAGATG  
ACGAACTGATGAGTCGAATCCGAAATTCTGACTTTTTTCGATGGTCAAG  
CACCCGTTGACAGTCTCAGACCGACGAACGCCGGTGTCTGACTCGAAAG  
GGACCGACGATCACCTCACCACCAGCATGGATAAGGCATCTGTAGAGA  
GTCAGCTTCCGAGAAGAGAGCCATTGGAGACGGAGCCAGATGAACAAG  
AAGAAGTTCATTTTCAGGAAGCGAGGCGTCGGTCCGACGCTGAAGTG  
ACTGACGACCACATCTACGAGGAGCACACTGATCGTAAAGTGGTTCCG  
AGGAAGTCGGAGGGCAAGCGAAGCTTCAAAGACTTGCTGAAGAAGCT  
CGCGCTGCCGGCTGTTGGTATGGGTGCATCGTATTTTGCCGCTGATA  
GAATTCTGCCGGAACATAACAGAGCAGCAACAGACAGGCGACGAACCCC  
TATCCACCGGCCAGAATGTGAGCACTGTGATAGGCTTCGCAGCGCTTG  
CTGCTGCCGTAGCGTTCCTTGGCCTGGGTATCAAGAGGACGTACCGAC  
ATTTTTTCCCCACGCAAAAACAGATCACGGCAGCCTGCACCCGAGCACG  
AGGTGCCTGAATCAGGCGAAGATAGGGAGGATGCCCCGCCAGTAG

>RUB

ATGGCCCGACACGCAATTTTTTTTCGCGCTTTGTGTTTTAGGCCTGGT  
GGCGGCGGCTTTGCCCCAGTTCGCTACCGCGGCCACCGCGTCAGATG  
ACGAACTGATGAGTCGAACCCGAAATTCTGACTTTTTTCGATGGTCAAG  
CACCCGTTGACAGTCTCAGACCGACGAACGCCGGTGTCTGACTCGAAAG  
GGACCGACGATCACCTCACCACCAGCATGGATAAGGCATCTGTAGAGA  
GTCAGCTTCCGAGAAGAGAGCCATTGGAGACGGAGCCAGATGAACAAG  
AAGAAGTTCATTTTCAGGAAGCGAGGCGTCCGTTCCGACGCTGAAGTGA  
CTGACGACAACATCTACGAGGAGCACACTGATCGTAAAGTGGTTCCGA  
GGAAGTCGGAGGGCAAGCGAAGCTTCAAAGACTTGCTGAAGAAGCTC  
GCGCTGCCGGCTGTTGGTATGGGTGCATCGTATTTTGCCGCTGATAG  
AATTCTGCCGGAACAAACAGAGCAGCAACAGGCAGGCCGAAGAACCCT  
AACCACCAGCCAGAATGTGAACACTGTGTTAGGCTTCGCAGCGCTTGC  
TGCTGCCGCAGCGTTCCTTGGCATGGGTCTCACGAGGACGTACCGAC  
ATTTTTCCCCACGCAAAAACAGATCACGGCAGCCTGCACTCGAGCAAG  
AGGTGCCTGAATCAGGCGAAGATGGGGAGGATGCCCGCCAGTAG

>FOU

ATGGCCCGACACGCAATTTTTTTCCGCGCTTTGTGTTTTAGGCCTGGT  
GGCGGCGGCTTTGCCCCAGTTCGCTACCGCGGCCACCGCGTCAGATG  
ACGAACTGATGAGTCGAATCCGAAATTCTGACTTTTTTCGATGGTCAAG  
CACCCGTTGACAGTCTCAGACCGACGAACGCCGGTGTCTGACTCGAAAG  
GGACCGACGATCACCTCACCACCAGCATGGATAAGGCATCTGTAGAGA  
GTCAGCTTCCGAGAAGAGAGCCATTGGAGACGGAGCCAGATGAACAAG  
AAGAAGTTCATTTTCAGGAAGCGAGGCGTCCGTTCCGACGCTGAAGTGA  
CTGACGACAACATCTACGAGGAGCACACTGATCGTAAAGTGGTTCCGA  
GGAAGTCGGAGGGCAAGCGAAGCTTCAAAGACTTGCTGAAGAAGCTC  
GCGCTGCCGGCTGTTGGTATGGGTGCATCGTATTTTGCCGCTGATAG  
ACTTGTGCCGGAACAAACAGAGGAGCAACAGAGAGGGCGACGAACCCT  
AACCACCGGCCAGAATGTGGGCACTGTGTTAGGCTTCGCAGCGCTTG  
CTGCTGCCGCAGCGTTCCTTGGCATGGGTCTCACGAGGACGTACCGA  
CATTTTTCCCCACGCAAAAACAGATCACGGCAGCCTGCACTCGAGCAA  
GAGGTGCCTGAATCAGGCGAAGATGGGGAGGATGCCCGCCATGTCCC  
GAACGCGCCTGAGAGGCAGACAGACACAGAAGAGTGA

>CAST

ATGGCCCGACACGCAATTTTTTTTCGCGCTTTGTGTTTTAGGCCTGGT  
GGCGGCGGCTTTGCCCCAGTTCGCTACCGCGGCCACCGCGTCAGATG  
ACGAACTGATGAGTCGAATCCAAAATTCTGACTTTTTTCGATGGTCAAG  
CACCCGTTGACAGTCTCAGACCGACGAACGCCGGTGTTCGACTCGAAAG  
GGACCGACGATCACCTCACCACCAGCATGGATAAGGCATCTGTAGAGA  
GTCAGCTTCCGAGAAGAGAGCCATTGGAGACGGAACCAGATGAACAAG  
AAGAAGTTCATTTTCAGGAAGCGAGGCGTCGGTTCCGACGCTGAAGTG  
ACTGACGACCACATCTACGAGGAGCACACTGATCGCAAAGTGGTTCCG  
AGGATGTTCGGAGGGCAAGCGAAGCTTCAAAGACTTGCTGAAGAAGCT  
CGCGCTGCCGGCTGTTGGTATGGGTGCATCGTATTTTTGCCGCTGATA  
GAATTATGCCGGAACATAACAGAGCAGCAACAGGCAGGCGACGAACCCC  
TAACCACCGGCCAGAATGTGAACACTGTGTTAGGCTTCGCAGCGCTTG  
CTGCTGCCGTAGCGTTCCTTGGCCTGGGTATCAAGAGGACGTACCGAC  
ATTTTTTCCCCACGCAAAAACAGATCACGGCAGCCTGCACCCGAGCACG  
AGGTGCCTGAATCAGGCGAAGATAGGGAGGATGCCCCGCATGTCCCG  
AACGCGCCTGAGAGGCAGACAGACACAGAAGAGTGA

>TgCatBr5

ATGGCCCGACACGCAATTTTTTTTCGCGCTTTGTGTTTTAGGCCTGGT  
GGCGGCGGCTTTGCCCCAGTTCGCTACCGCGGCCACCGCGTCAGATG  
ACGAACTGATGAGTCGAATCCGAAATTCTGACTTTTTTCGATGGTCAAG  
CACCCGTTGACAGTCTCAGACCGACGAACGCCGGTGTTCGACTCGAAAG  
GGACCGACGATCACCTCACCACCAGCATGGATAAGGCATCTGTAGAGA  
GTCAGCTTCCGAGAAGAGAGCCATTGGAGACGGAGCCAGATGAACAAG  
AAGAAGTTCATTTTCAGGAAGCGAGGCGTCGGTTCCGACGCTGAAGTG  
ACTGACGACCACATCTACGAGGAGCACACTGATCGTAAAGTGGTTCCG  
AGGAAGTTCGGAGGGCAAGCGAAGCTTCAAAGACTTGCTGAAGAAGCT  
CGCGCTGCCGGCTGTTGGTATGGGTGCATCGTATTTTTGCCGCTGATA  
GAATTCTGCCGGAACATAACAGAGCAGCAACAGACAGGCGACGAACCCC  
TATCCACCGGCCAGAATGTGAGCACTGTGATAGGCTTCGCAGCGCTTG  
CTGCTGCCGTAGCGTTCCTTGGCCTGGGTATCAAGAGGACGTACCGAC  
ATTTTTTCCCCACGCAAAAACAGATCACGGCAGCCTGCACCCGAGCACG  
AGGTGCCTGAATCAGGCGAAGATAGGGAGGATGCCCCGCAGTAG

>p89

ATGGCCCGACACGCAATTTTTTTCCGCGCTTTGTGTTTTAGGCCTGGT

GGCGGCGGCTTTGCCCCAGTTCGCTACCGCGGCCACCGCGTCAGATG  
ACGAACTGATGAGTCGAATCCGAAATTCTGACTTTTTTCGATGGTCAAG  
CACCCGTTGACAGTCTCAGACCGACGAACGCCGGTGTCTGACTCGAAAG  
GGACCGACGATCACCTCACCACCAGCATGGATAAGGCATCTGTAGAGA  
GTCAGCTTCCGAGAAGAGAGCCATTGGAGACGGAGCCAGATGAACAAG  
AAGAAGTTCATTTTCAGGAAGCGAGGCGTCCGTTCCGACGCTGAAGTG  
ACTGACGACCACATCTACGAGGAGAACACTGATCGTAAAGTGGTTCCG  
AGGAAGTCGGAGGGCAAGCGAAGCTTCAAAGACTTGCTGAAGAAGCT  
CGCGCTGCCGGCTGTTGGTATGGGTGCATCGTATTTTGCCGCTGATA  
GAATTCTGCCGGAACAAACAGAGCAGCAACAGACAGGCGACGAACCCC  
TATCCACCGGCCAGAATGTGAGCACTGTGATAGGCTTCGCAGCGCTTG  
CTGCTGCCGTAGCGTTCCTTGGCCTGGGTATCAAGAGGACGTACCGAC  
ATTTTTCCCCACGCAAAAACAGATCACGGCAGCCTGCACCCGAGCACG  
AGGTGCCTGAATCAGGCGAAGATAGGGAGGATGCCCGCCAGTAG

>VAND

ATGGCCCGACACGCAATTTTTTTTCGCGCTTTGTGTTTTAGGCCTGGT  
GGCGGCGGCTTTGCCCCAGTTCGCTACCGCGGCCACCGCGTCAGATG  
ACGAACTGATGAGTCGAACCCGAAATTCTGACTTTTTTCGATGGTCAAG  
CACCCGTTGACAGTCTCAGACCGACGAACGCCGGTGTCTGACTCGAAAG  
GGACCGACGATCACCTCACCACCAGCATGGATAAGGCATCTGTAGAGA  
GTCAGCTTCCGAGAAGAGAGCCATTGGAGACGGAGCCAGATGAACAAG  
AAGAAGTTCATTTTCAGGAAGCGAGGCGTCCGTTCCGACGCTGAAGTGA  
CTGACGACAACATCTACGAGGAGCACACTGATCGTAAAGTGGTTCCGA  
GGAAGTCGGAGGGCAAGCGAAGCTTCAAAGACTTGCTGAAGAAGCTC  
GCGCTGCCGGCTGTTGGTATGGGTGCATCGTATTTTGCCGCTGATAG  
AATTCTGCCGGAACAAACAGAGCAGCAACAGGCAGGCGAAGAACCCCT  
AACCACCAGCCAGAATGTGAACACTGTGTTAGGCTTCGCAGCGCTTGC  
TGCTGCCGCAGCGTTCCTTGGCATGGGTCTCACGAGGACGTACCGAC  
ATTTTTCCCCACGCAAAAACAGATCACGGCAGCCTGCACTCGAGCAAG  
AGGTGCCTGAATCAGGCGAAGATGGGGAGGATGCCCGCCATGTCCCG  
AACGCGCCTGAGAGGCAGACAGACAGAGAAGAGTGA

>TgCgCa1

ATGGCCCGACACGCAATTTTTTTTCGCGCTTTGTGTTTTAGGCCTGGT  
GGCGGCGGCTTTGCCCCAGTTCGCTACCGCGGCCACCGCGTCAGATG

ACGAACTGATGAGTCGAATCCGAAATTCTGACTTTTTTCGATGGTCAAG  
CACCCGTTGACAGTCTCAGACCGACGAACGCCGGTGTCTGACTCGAAAG  
GGACCGACGATCACCTCACCACCAGCATGGATAAGGCATCTGTAGAGA  
GTCAGCTTCCGAGAAGAGAGCCATTGGAGACGGAGCCAGATGAACAAG  
AAGAAGTTCATTTTCAGGAAGCGAGGCGTCCGTTCCGACGCTGAAGTGA  
CTGACGACAACATCTACGAGGAGCACACTGATCGTAAAGTGGTTCCGA  
GGAAGTCGGAGGGCAAGCGAAGCTTCAAAGACTTGCTGAAGAAGCTC  
GCGCTGCCGGCTGTTGGTATGGGTGCATCGTATTTTGCCGCTGATAG  
AATTCTGCCGGAACAAACAGAGCAGCAACAGACAGGCGAAGAACCCCT  
AACCACCGGCCAGAATGTGAGCACTGTGTTAGGCTTCGCAGCGCTTGC  
TGCTGCCGCAGCGTTCCTTGGCATGGGTCTCACGAGGACGTACCGAC  
ATTTTTCCCCACGCAAAAACAGATCACGGCAGCCTGCACTCGAGCAAG  
AGGTGCCTGAATCAGGCGAAGATGGGGAGGATGCCCCGCCAGTAG

>ARI

ATGGCCCGACACGCAATTTTTTTTCGCGCTTTGTGTTTTAGGCCTGGT  
GGCGGCGGCTTTGCCCCAGTTCGCTACCGCGGCCACCGCGTCAGATG  
ACGAACTGATGAGTCGAATCCGAAATTCTGACTTTTTTCGATGGTCAAG  
CACCCGTTGACAGTCTCAGACCGACGAACGCCGGTGTCTGACTCGAAAG  
GGACCGACGATCACCTCACCACCAGCATGGATAAGGCATCTGTAGAGA  
GTCAGCTTCCGAGAAGAGAGCCATTGGAGACGGAGCCAGATGAACAAG  
AAGAAGTTCATTTTCAGGAAGCGAGGCGTCCGTTCCGACGCTGAAGTGA  
CTGACGACAACATCTACGAGGAGCACACTGATCGTAAAGTGGTTCCGA  
GGAAGTCGGAGGGCAAGCGAAGCTTCAAAGACTTGCTGAAGAAGCTC  
GCGCTGCCGGCTGTTGGTATGGGTGCATCGTATTTTGCCGCTGATAG  
AATGCTGCCGGAACAAACAGAGCAGCAACAGACAGGCGAAGAACCCCT  
AACCACCGGCCAGAATGTGAACACTGTGATAGGCTTCGCAGCGCTTGC  
TGCTGCCGCAGCGTTCCTTGGCATGGGTATCACGAGGACGTACCGACA  
TTTCTCCCCACGCAAAAACAGATCACGGCAGCCTGCACTCGAGCACGA  
GGTGCCTGAATCAGGCGAAGATGGGGAGGATGCCCCGCCAGTAG

>TgCtPRC2

ATGGCCCGACACGCAATTTTTTTTCGCGCTTTGTGTTTTAGGCCTGGT  
GGCGGCGGCTTTGCCCCAGTTCGCTACCGCGGCCACCGCGTCAGATG  
ACGAACTGATGAGTCGAATCCGAAATTCTGACTTTTTTCGATGGTCAAG  
CACCCGTTGACAGTCTCAGACCGACGAACGCCGGTGTCTGACTCGAAAG

GGACCGACGATCACCTCACCACCAGCATGGATAAGGCATCTGTAGAGA  
GTCAGCTTCCGAGAAGAGAGCCATTGGAGACGGAGCCAGATGAANN  
NAAGAAGTTCATTTTCAGGAAGCGAGGCGTCCGTTCCGACGCTGAAGT  
GACTGACGACAACATCTACGAGGAGCACACTGATCGTAAAGTGGTTCC  
GAGGAAGTCGGAGGGCAAGCGAAGCTTCAAAGACTTGCTGAAGAAGC  
TCGCGCTGAGAACCCCTAACACCAGGCGCAGAATGTGAGCACTGTGTTA  
GGCTTCGCAGCGCTTGCTGCTGCCGCAGCGTTCCTTGGCAAGAACC  
CTAACACCAGGCGCAGAATGTGAGCACTGTGTTAGGCTTCGCAGCGCTT  
GCTGCTGCCGCAGCGTTCCTTGGCATGGGTCTCACGAGGACGTACCG  
ACATTTTTCCCCACGCAAAAACAGATCACGGCAGCCTGCACTCGAGCA  
AGAGGTGCCTGAATCAGGCGAAGATGGGGAGGATGCCCCGCCAGTAG

>GAB2-2007-GAL-DOM2

AACGTTTTGTATTAAGGGATTACTGCGGCGTCTCATTTCCAAAATG  
GCCCCGACACGCAATTTTTTCCGCGCTTTGTGTTTTAGGCCTGGTGGC  
GGCGGCTTTGCCCCAGTTCGCTACCGCGGCCACCGCGTCAGATGACG  
AACTGATGAGTCGAATCCGAAATTCTGACTTTTTTCGATGGTCAAGCAC  
CCGTTGACAGTCTCAGACCGACGAACGCCGGTGTGACTCGAAAGGG  
ACCGACGATCACCTCACCACCAGCATGGATAAGGCATCTGTAGAGAGT  
CAGCTTCCGAGAAGAGAGCCATTGGAGACGGAGCCAGATGAACAAGAA  
GAAGTTCATTTTCAGGAAGCGAGGCGTCCGTTCCGACGCTGAAGTGAC  
TGACGACAACATCTACGAGGAGCACACTGATCGTAAAGGTGGTTCCGAG  
GAAGTCGGAGGGCAAGCGAAGCTTCAAAGACTTGCTGAAGAAGCTCG  
CGCTGCCGGCTGTTGGTATGGGTGCATCGTATTTTGCCGCTGATAGA  
CTTGTGCCGGAACAAACAGAGGAGCAACAGAGAGGCGACGAACCCCTA  
ACCACCGGCCAGAATGTGGGCACTGTGTTAGGCTTCGCAGCGCTTGC  
TGCTGCCGCAGCGTTCCTTGGCATGGGTCTCACGAGGACGTACCGAC  
ATTTTTCCCCACGCAAAAACAGATCACGGCAGCCTGCACTCGAGCAAG  
AGGTGCCTGAATCAGGCGAAGATGGGGAGGATGCCCCGCCAGTAGGAT  
ATGGGGGCTAATAAAGTGAGTAGGAGCTCGAGGACAGTGTCCCGAAC  
GCGCCTGAGAGGCAGACAGACAGAAAGAGTGAAGAAAAACAACATGG  
TATTACGTGCGGTGAGTGTTTGTCTG>TgCtCo5AACGTTTTGTATTA  
GGGTTTACTGCGGCGTCTCATTTCCAAAATGGCCCCGACACGCAATTT  
TTTCGCGCTTTGTGTTTTAGGCCTGGTGGCGGGCGGCTTTGCCCCAGT  
TCGCTACCGCGGCCACCGCGTCGGATGACGAACTGATGAGTCGAATCC  
GAAATTCTGACTTTTTTCGATGGTCAAGCACCCGTTGACAGTCTCAGAC



CGACGAACGCCGGTGTCTGACTCGAAAGGGACCGACGATCACCTCACCA  
CCAGCATGGATAAGGCATCTGTAGAGAGTCAGCTTCCGAGAAGAGAGC  
CATTGGAGACGGAGCCAGATGAACAAGAAGAAGTTCATTTTCAGGAAGC  
GAGGCGTTCGGTTCCGACGCTGAAGTGACTGACGACCACATCTACGAG  
GAGAACACTGATCGTAAAGTGGTTCCGAGGAAGTCGGAGGGCAAGCG  
AAGCTTCAAAGACTTGCTGAAGAAGCTCGCGCTGCCGGCTGTTGGTA  
TGGGTGCATCGTATTTTGCCGCTGATAGAATTCTGCCGGAACAAACAG  
AGCAGCAACAGACAGGCGACGAACCCCTATCCACCGGCCAGAATGTGA  
GCACTGTGATAGGCTTCGCAGCGCTTGCTGCTGCCGTAGCGTTCCTT  
GGCCTGGGTATCAAGAGGACGTACCGACATTTTCCCCACGCAAAAAC  
AGATCACGGCAGCCTGCACCCGAGCACGAGGTGCCTGAATCAGGCGAA  
GATAGGGAGGATGCCCGCCAGTAGGATATGGGGGCTAATAAAAAGTGAG  
TAGGAGCTCGAGGACAGTGTCCCGAACGCGCCTGAGAGGCAGAGAGA  
CACAGAAGAGTGAAGAAAAACAACATGGTATTACGTGCGGTTGAGTGT  
TGCTG

>TgCatJpOk1

CGTCTCATTTCCAAAATGGCCCGACACGCAATTTTTTTTCGCGCTTTGT  
GTTTTAGGCCTGGTGGCGGCGGCTTTGCCCCAGTTCGCTACCGCGGC  
CACCGCGTCGGATGACGAACTGATGAGTCGAATCCGAAATTCTGACTT  
TTTCGATGGTCAAGCACCCGTTGACAGTCTCAGACCGACGAACGCCGG  
TGTCGACTCGAAAGGGACCGACGATCACCTCACCACCAGCATGGATAA  
GGCATCTGTAGAGAGTCAGCTTCCGAGAAGAGAGCCATTGGAGACGGA  
GCCAGATGAACAAGAAGAAGTTCATTTTCAGGAAGCGAGGCGTCGGTTC  
CGACGCTGAAGTAACTGACGACCACATCTACGAGGAGAACACTGATCG  
TAAAGTGGTTCCGAGGAAGTCGGAGGGCAAGCGAAGCTTCAAAGACT  
TGCTGAAGAAGCTCGCGCTGCCGGCTGTTGGTATGGGTGCATCGTAT  
TTTGCCGCTGATAGAATTCTGCCGGAACAAACAGAGCAGCAACAGACA  
GGCGACGAACCCCTATCCACCGGCCAGAATGTGAGCACTGTGATAGGC  
TTCGCAGCGCTTGCTGCTGCCGTAGCGTTCCTTGGCCTGGGTATCAA  
GAGGACGTACCGACATTTTTCCCCACGCAAAAACAGATCACGGCAGCC  
TGCACCCGAGCACGAGGTGCCTGAATCAGGCGAAGATAGGGAGGATG  
CCCGCCAGTAGGATATGGGGGCTAATAAAAAGTGAGTAGGAGCTCGAGG  
ACAGTGTCCCGAACGCGCCTGAGAGGCAGAGAGACACAGAAGAGTGAA  
GAAAAACAACATGGTATTACGTGCGGTTGAG

>TgCatJpOk2

AAATGGCCCGACACGCAATTTTTTTTCGCGCTTTGTGTTTTAGGCCTGG  
TGGCGGCGGCTTTGCCCCAGTTCGCTACCGCGGCCACCGCGTCGGAT  
GACGAACTGATGAGTCGAATCCGAAATTCTGACTTTTTTCGATGGTCAA  
GCACCCGTTGACAGTCTCAGACCGACGAACGCCGGTGTGACTCGAAA  
GGGACCGACGATCACCTCACCACCAGCATGGATAAGGCATCTGTAGAG  
AGTCAGCTTCCGAGAAGAGAGCCATTGGAGACGGAGCCAGATGAACAA  
GAAGAAGTTCATTTTCAGGAAGCGAGGCGTCGGTTCGGACGCTGAAGT  
AACTGACGACCACATCTACGAGGAGAACACTGATCGTAAAGTGGTTCC  
GAGGAAGTCGGAGGGCAAGCGAAGCTTCAAAGACTTGCTGAAGAAGC  
TCGCGCTGCCGGCTGTTGGTATGGGTGCATCGTATTTTGCCGCTGAT  
AGAATTCTGCCGGAACATAACAGAGCAGCAACAGACAGGCGACGAACCC  
CTATCCACCGGCCAGAATGTGAGCACTGTGATAGGCTTCGCAGCGCTT  
GCTGCTGCCGTAGCGTTCCTTGGCCTGGGTATCAAGAGGACGTACCG  
ACATTTTTTCCCCACGCAAAAACAGATCACGGCAGCCTGCACCCGAGCA  
CGAGGTGCCTGAATCAGGCGAAGATAGGGAGGATGCCCCGCCAGTAGG  
ATATGGGGGCTAATAAAAAGTGAGTAGGAGCTCGAGGACAGTGTCCCGA  
ACGCGCCTGAGAGGCAGAGAGACACAGAAGAGTGAAGAAAAACAA

>TgCatJpOk3

TTTTGTATTAAGGGTTTACTGCGGCGTCTCATTTCCAAATGGCCC  
GACACGCAATTTTTTTTCGCGCTTTGTGTTTTAGGCCTGGTGGCGGCG  
GCTTTGCCCCAGTTCGCTACCGCGGCCACCGCGTCAGATGACGAACTG  
ATGAGTCGAATCCGAAATTCTGACTTTTTTCGATGGTCAAGCACCCGTT  
GACAGTCTCAGACCGACGAACGCCGGTGTGACTCGAAAGGGACCGAC  
GATCACCTCACCACCAGCATGGATAAGGCATCTGTAGAGAGTCAGCTT  
CCGAGAAGAGAGCCATTGGAGACGGAGCCAGATGAACAAGAAGTTCAT  
TTCAGGAAGCGAGGCGTCCGTTCCGACGCTGAAGTACTGACGACAA  
CATCTACGAGGAGCACACTGATCGTAAAGTGGTTCCGAGGAAGTCGGA  
GGGCAAGCGAAGCTTCAAAGACTTGCTGAAGAAGCTCGCGCTGCCGG  
CTGTTGGTATGGGTGCATCGTATTTTGCCGCTGATAGAATTCTGCCGG  
AACTAACAGAGCAGCAACAGACAGGCGAAGAACCCTAACCACCGGCC  
AGAATGTGAGCACTGTGTTAGGCTTCGCAGCGCTTGCTGCTGCCGCA  
GCGTTCCTTGGCATGGGTCTCACGAGGACGTACCGACATTTTTTCCCA  
CGCAAAAACAGATCACGGCAGCCTGCACTCGAGCAAGAGGTGCCTGAA  
TCAGGCGAAGATGGGGAGGATGCCCGCCAGTAGGATATGGGGGCTAA

TAAAAGTGAGTAGGAGCTCGAGGACAGTGTCCCGAACGCGCCTGAGAG  
GCAGACAGACACAGAAGAGTGAAGAAAAACAACA

>TgCatJpOk4

TTTTGTATTAAAAGGGTTTACTGCGGCGTCTCATTTCCAAAATGGCCC  
GACACGCAATTTTTTTTCGCGCTTTGTGTTTTAGGCCTGGTGGCGGCG  
GCTTTGCCCCAGTTCGCTACCGCGGCCACCGCGTCAGATGACGAACTG  
ATGAGTCGAATCCGAAATTCTGACTTTTTTCGATGGTCAAGCACCCGTT  
GACAGTCTCAGACCGACGAACGCCGGTGTGACTCGAAAGGGACCGAC  
GATCACCTCACCACCAGCATGGATAAGGCATCTGTAGAGAGTCAGCTT  
CCGAGAAGAGAGCCATTGGAGACGGAGCCAGATGAACAAGAAGTTCAT  
TTCAGGAAGCGAGGCGTCCGTTCCGACGCTGAAGTGACTGACGACAA  
CATCTACGAGGAGCACACTGATCGTAAAGTGGTTCCGAGGAAGTCGGA  
GGGCAAGCGAAGCTTCAAAGACTTGCTGAAGAAGCTCGCGCTGCCGG  
CTGTTGGTATGGGTGCATCGTATTTTGCCGCTGATAGAATTCTGCCGG  
AACTAACAGAGCAGCAACAGACAGGCGAAGAACCCCTAACCACCGGCC  
AGAATGTGAGCACTGTGTTAGGCTTCGCAGCGCTTGCTGCTGCCGCA  
GCGTTCCTTGGCATGGGTCTCACGAGGACGTACCGACATTTTTCCCCA  
CGCAAAAACAGATCACGGCAGCCTGCACTCGAGCAAGAGGTGCCTGAA  
TCAGGCGAAGATGGGGAGGATGCCCGCCAGTAGGATATGGGGGCTAA  
TAAAAGTGAGTAGGAGCTCGAGGACAGTGTCCCGAACGCGCCTGAGAG  
GCAGACAGACACAGAAGAGTGAAGAAAAACAACA

>TgCatJpTy1/k-3

TCGAGTTTTGTTGATGATTGAAGTACCCTGTATTGGGGCTTGCTAACG  
TTTTGTATTAAAAGGGTTTACTGCGGCGTCTCATTTCCAAAATGGCCC  
GACACGCAATTTTTTTTCGCGCTTTGTGTTTTAGGCCTGGTGGCGGCG  
GCTTTGCCCCAGTTCGCTACCGCGGCCACCGCGTCAGATGACGAACTG  
ATGAGTCGAATCCGAAATTCTGACTTTTTTCGATGGTCAAGCACCCGTT  
GACAGTCTCAGACCGACGAACGCCGGTGTGACTCGAAAGGGACCGAC  
GATCACCTCACCACCAGCATGGATAAGGCATCTGTAGAGAGTCAGCTT  
CCGAGAAGAGAGCCATTGGAGACGGAGCCAGATGAAC<sub>nnn</sub>AAGAAGTT  
CATTTTCAGGAAGCGAGGCGTCCGTTCCGACGCTGAAGTGACTGACGA  
CAACATCTACGAGGAGCACACTGATCGTAAAGTGGTTCCGAGGAAGTC  
GGAGGGCAAGCGAAGCTTCAAAGACTTGCTGAAGAAGCTCGCGCTGC  
CGGCTGTTGGTATGGGTGCATCGTATTTTGCCGCTGATAGAATTCTGC

CGGAACTAACAGAGCAGCAACAGACAGGCGAAGAACCCCTAACCACCG  
GCCAGAATGTGAGCACTGTGTTAGGCTTCGCAGCGCTTGCTGCTGCC  
GCAGCGTTCCTTGGCATGGGTCTCACGAGGACGTACCGACATTTTTCC  
CCACGCAAAAACAGATCACGGCAGCCTGCACTCGAGCAAGAGGTGCCT  
GAATCAGGCGAAGATGGGGAGGATGCCCGCCAGTAGGATATGGGGGC  
TAATAAAAGTGAGTAGGAGCTCGAGGACAGTGTCCCGAACGCGCCTGA  
GAGGCAGACAGACACAGAAGAGTGAAGAAAAACAACATGGTATTACGT  
GCGGTGAGTGTTTGCTGTCACG

>TgCatJpGi1/TaJ

GTTTTGTATTNAAAGGGTTTACTGCGGCGTCTCATTTCCAAATGGCC  
CGACACGCAATTTTTTTTCGCGCTTTGTGTTTTAGGCCTGGTGGCGGC  
GGCTTTGCCCCAGTTCGCTACCGCGGCCACCGCGTCGGATGACGAAC  
TGATGAGTCGAATCCGAAATTCTGACTTTTTTCGATGGTCAAGCACCCG  
TTGACAGTCTCAGACCGACGAACGCCGGTGTGACTCGAAAGGGACC  
GACGATCACCTCACCACCAGCATGGATAAGGCATCTGTAGAGAGTCAG  
CTTCCGAGAAGAGAGCCATTGGAGACGGAGCCAGATGAACAAGAAGAA  
GTTCAATTCAGGAAGCGAGGCGTCGGTTCCGACGCTGAAGTGACTION  
CGACCACATCTACGAGGAGAACACTIONGATCGTAAAGTGGTTCCGAGGAA  
GTCGGAGGGCAAGCGAAGCTTCAAAGACTTGCTGAAGAAGCTCGCGC  
TGCCGGCTGTTGGTATGGGTGCATCGTATTTTGCCGCTGATAGAATTC  
TGCCGGAACCTAACAGAGCAGCAACAGACAGGCGACGAACCCCTATCCA  
CCGGCCAGAATGTGAGCACTGTGATAGGCTTCGCAGCGCTTGCTGCT  
GCCGTAGCGTTCCTTGGCCTGGGTATCAAGAGGACGTACCGACATTTT  
TCCCCACGCAAAAACAGATCACGGCAGCCTGCACCCGAGCACGAGGTG  
CCTGAATCAGGCGAAGATAGGGAGGATGCCCGCCAGTAGGATATGGG  
GGCTAATAAAAGTGAGTAGGAGCTCGAGGACAGTGTCCCGAACGCGCC  
TGAGAGGCAGAGAGACACAGAAGAGTGAAGAAAAACAACATGGTATTA  
CGTGCGGTGA

>TgGoatJpOk1

CGTCTCATTTCCAAATGGCCCGACACGCAATTTTTTTTCGCGCTTTGT  
GTTTTAGGCCTGGTGGCGGCGGCTTTGCCCCAGTTTCGCTACCGCGG  
CCACCGCGTCGGATGACGACTIONGATGAGTCGAATCCGAAATTCTGACT  
TTTTTCGATGGTCCAAGCACCCGTTGACAGTCTCAGACCGACGAACGCC  
GGTGTGCACTCGAAAGGGACCGACGATCACCTCACCACCAGCATGGAT

AAGGCATCTGTAGAGAGTCAGCTTCCGAGAAGAGAGCCATTGGAGACG  
GAGCCAGATGAACAAGAAGAAGTTCATTTTCAGGAAGCGAGGCGTCCGT  
TCCGACGCTGAAGTAACTGACGACCACATCTACGAGGAGAACACTGAT  
CGTAAAGTGGTTCCGAGGAAGTCGGAGGGCAAGCGAAGCTTCAAAGA  
CTTGCTGAAGAAGCTCGCGCTGCCGGCTGTTGGTATGGGTGCATCGT  
ATTTTGCCGCTGATAGAATTCTGCCGGAACAAACAGAGCAGCAACAGA  
CAGGCGACGAACCCCTATCCACCGGCCAGAATGTGAGCACTGTGATAG  
GCTTCGCAGCGCTTGCTGCTGCCGTAGCGTTCCTTGGCCTGGGTATC  
AAGAGGACGTACCGACATTTTTTCCCCACGCAAAAACAGATCACGGCAG  
CCTGCACCCGAGCACGAGGTGCCTGAATCAGGCGAAGATAGGGAGGA  
TGCCCGCCAGTAGGATATGGGGGGCTAATAAAAAGTGAGTAGGAGCTCG  
AGGACAGTGTCCCGAACGCGCCTGAGAGGCAGAGAGACACAGAAGAGT  
GA

>TgGoatJpOk2

GGCGTCTCATTTCCAAAATGGCCCGACACGCAATTTTTTTTCGCGCTTT  
GTGTTTTAGGCCTGGTGGCGGCGGCTTTGCCCCAGTTCGCTACCGCG  
GCCACCGCGTCGGATGACGAACTGATGAGTCGAATCCGAAATTCTGAC  
TTTTTCGATGGTCCAAGCACCCGTTGACAGTCTCAGACCGACGAACGC  
CGGTGTCGACTCGAAAGGGACCGACGATCACCTCACCACCAGCATGGA  
TAAGGCATCTGTAGAGAGTCAGCTTCCGAGAAGAGAGCCATTGGAGAC  
GGAGCCAGATGAACAAGAAGAAGTTCATTTTCAGGAAGCGAGGCGTCCG  
GTTCCGACGCTGAAGTAACTGACGACCACATCTACGAGGAGAACACTG  
ATCGTAAAGTGGTTCCGAGGAAGTCGGAGGGCAAGCGAAGCTTCAA  
GACTTGCTGAAGAAGCTCGCGCTGCCGGCTGTTGGTATGGGTGCATC  
GTATTTTGCCGCTGATAGAATTCTGCCGGAACAAACAGAGCAGCAACA  
GACAGGCGACGAACCCCTATCCACCGGCCAGAATGTGAGCACTGTGAT  
AGGCTTCGCAGCGCTTGCTGCTGCCGTAGCGTTCCTTGGCCTGGGT  
TCAAGAGGACGTACCGACATTTTTTCCCCACGCAAAAACAGATCACGGC  
AGCCTGCACCCGAGCACGAGGTGCCTGAATCAGGCGAAGATAGGGAG  
GATGCCCGCCAGTAGGATATGGGGGGCTAATAAAAAGTGAGTAGGAGCTC  
GAGGACAGTGTCCCGAACGCGCCTGAGAGGCAGAGAGACACAGAAGA  
GTGAAGAAAAACAACATGGTATTAC

>TgGoatJpOk3

ATGGCCCGACACGCAATTTTTTTTCGCGCTTTGTGTTTTAGGCCTGGT

GGCGGCGGCTTTGCCCCAGTTCGCTACCGCGGCCACCGCGTCGGGAT  
GACGAACTGATGAGTCGAATCCGAAATTCTGACTTTTTTCGATGGTCAA  
GCACCCGTTGACAGTCTCAGACCGACGAACGCCGGTGTGACTCGAAA  
GGGACCGACGATCACCTCACCACCAGCATGGATAAGGCATCTGTAGAG  
AGTCAGCTTCCGAGAAGAGAGCCATTGGAGACGGAGCCAGATGAACAA  
GAAGAAGTTCATTTTCAGGAAGCGAGGCGTCCGGTTCGGACGCTGAAGT  
AACTGACGACCACATCTACGAGGAGAACACTGATCGTAAAGTGGTTCC  
GAGGAAGTCGGAGGGCAAGCGAAGCTTCAAAGACTTGCTGAAGAAGC  
TCGCGCTGCCGGCTGTTGGTATGGGTGCATCGTATTTTGCCGCTGAT  
AGAATTCTGCCGGAAC TAACAGAGCAGCAACAGACAGGCGACGAACCC  
CTATCCACCGGCCAGAATGTGAGCACTGTGATAGGCTTCGCAGCGCTT  
GCTGCTGCCGTAGCGTTCCTTGGCCTGGGTATCAAGAGGACGTACCG  
ACATTTTTTCCCCACGCAAAAACAGATCACGGCAGCCTGCACCCGAGCA  
CGAGGTGCCTGAATCAGGCGAAGATAGGGAGGATGCCCCGCCAGTAGG  
ATATGGGGGCTAATAAAAAGTGAGTAGGAGCTCGAGGACAGTGTCCCGA  
ACGCGCCTGAGAGGCAGAGAGACACAGAAGAGTGAAGAAAAACAACAT  
GG

>TgGoatJpOk4

TATTAAGGGTTTACTGCGGCGTCTCATTTCCAAAATGGCCCGACAC  
GCAATTTTTTTTCGCGCTTTGTGTTTTAGGCCTGGTGGCGGCGGCTTT  
GCCCCAGTTCGCTACCGCGGCCACCGCGTCAGATGACGAACTGATGAG  
TCGAATCCGAAATTCTGACTTTTTTCGATGGTCAAGCACCCGTTGACAG  
TCTCAGACCGACGAACGCCGGTGTGACTCGAAAGGGACCGACGATCA  
CCTCACCACCAGCATGGATAAGGCATCTGTAGAGAGTCAGCTTCCGAG  
AAGAGAGCCATTGGAGACGGAGCCAGATGAACAAGAAGTTCATTTTCAG  
GAAGCGAGGCGTCCGTTCCGACGCTGAAGTACTGACGACAACATCTA  
CGAGGAGCACACTGATCGTAAAGTGGTTCCGAGGAAGTCGGAGGGCA  
AGCGAAGCTTCAAAGACTTGCTGAAGAAGCTCGCGCTGCCGGCTGTT  
GGTATGGGTGCATCGTATTTTGCCGCTGATAGAATTCTGCCGGAAC TA  
ACAGAGCAGCAACAGACAGGCGAAGAACCCTAACCACCGGCCAGAAT  
GTGAGCACTGTGTTAGGCTTCGCAGCGCTTGCTGCTGCCGCAGCGTT  
CCTTGGCATGGGTCTCACGAGGACGTACCGACATTTTTTCCCCACGCAA  
AAACAGATCACGGCAGCCTGCACTCGAGCAAGAGGTGCCTGAATCAGG  
CGAAGATGGGGAGGATGCCCCGCCAGTAGGATATGGGGGCTAATAAAA  
GTGAGTAGGAGCTCGAGGACAGTGTCCCGAACGCGCCTGAGAGGCAG

ACAGACACAGAAGAGTGAAGAAAACAACATGGTATTACGTGCGGTGAG  
TGTTTGCT

>TgGoatJpOk5

GGGTTTACTGGGGCGTCTCATTTCCAAAATGGCCCGACACGCAATTTT  
TTTCGCGCTTTGTGTTTTAGGCCTGGTGGCGGGCGGCTTTGCCCCAGT  
TCGCTACCGCGGCCACCGCGTCGGGATGACGAACTGATGAGTCGAAT  
CCGAAATTCTGACTTTTTTCGATGGTCAAGCACCCGTTGACAGTCTCAG  
ACCGACGAACGCCGGTGTCTGACTCGAAAGGGACCGACGATCACCTCAC  
CACCAGCATGGATAAGGCATCTGTAGAGAGTCAGCTTCCGAGAAGAGA  
GCCATTGGAGACGGAGCCAGATGAACAAGAAGAAGTTCATTTTCAGGAA  
GCGAGGCGTCGGTTCGACGCTGAAGTAACTGACGACCACATCTACGA  
GGAGAACACTGATCGTAAAGTGGTTCGAGGAAGTCGGAGGGCAAGC  
GAAGCTTCAAAGACTTGCTGAAGAAGCTCGCGCTGCCGGCTGTTGGT  
ATGGGTGCATCGTATTTTGCCGCTGATAGAATTCTGCCGGAACATAACA  
GAGCAGCAACAGACAGGCGACGAACCCCTATCCACCGGCCAGAATGTG  
AGCACTGTGATAGGCTTCGCAGCGCTTGCTGCTGCCGTAGCGTTCCT  
TGGCCTGGGTATCAAGAGGACGTACCGACATTTTTCCCCACGCAAAA  
CAGATCACGGCAGCCTGCACCCGAGCACGAGGTGCCTGAATCAGGCG  
AAGATAGGGAGGATGCCCGCCAGTAGGATATGGGGGCTAATAAAAAGTG  
AGTAGGAGCTCGAGGACAGTGTCCCGAACGCGCCTGAGAGGCAGAGA  
GACACAGAAGAGTGAAGA

>TgGoatJpOk6

TTTGTATTAAGGGTTTACTGCGGCGTCTCATTTCCAAAATGGCCCG  
ACACGCAATTTTTTCGCGCTTTGTGTTTTAGGCCTGGTGGCGGGCGG  
CTTTGCCCCAGTTCGCTACCGCGGCCACCGCGTCAGATGACGAACTGA  
TGAGTCGAATCCGAAATTCTGACTTTTTTCGATGGTCAAGCACCCGTTG  
ACAGTCTCAGACCGACGAACGCCGGTGTCTGACTCGAAAGGGACCGACG  
ATCACCTCACCACCAGCATGGATAAGGCATCTGTAGAGAGTCAGCTTC  
CGAGAAGAGAGCCATTGGAGACGGAGCCAGATGAACAAGAAGTTCATT  
TCAGGAAGCGAGGCGTCCGTTCCGACGCTGAAGTACTGACGACAACA  
TCTACGAGGAGCACACTGATCGTAAAGTGGTTCGAGGAAGTCGGAGG  
GCAAGCGAAGCTTCAAAGACTTGCTGAAGAAGCTCGCGCTGCCGGCT  
GTTGGTATGGGTGCATCGTATTTTGCCGCTGATAGAATTCTGCCGAA  
CTAACAGAGCAGCAACAGACAGGCGAAGAACCCTAACCCAGGCCAG

AATGTGAGCACTGTGTTAGGCTTCGCAGCGCTTGCTGCTGCCGCAGC  
GTTCTTGGCATGGGTCTCACGAGGACGTACCGACATTTTTCCCCACG  
CAAAAACAGATCACGGCAGCCTGCACTCGAGCAAGAGGTGCCTGAATC  
AGGCGAAGATGGGGGAGGATGCCCCGCCAGTAGGATATGGGGGCTAAT  
AAAAGTGAGTAGGAGCTCGAGGACAGTGTCCCGAACGCGCCTGAGAG  
GCAGACAGACACAGAAGAGTGAAGAAAAACAACATGGTATTACGTGCG  
GT

>TgGoatJpOk7

CTGCGGCGTCTCATTTCCAAAATGGCCCGACACGCAATTTTTTTTCGCG  
CTTTGTGTTTTAGGCCTGGTGGCGGCGGCTTTGCCCCAGTTCGCTAC  
CGCGGCCACCGCGTCAGATGACGAACTGATGAGTCGAATCCGAAATTC  
TGACTTTTTTCGATGGTCCAAGCACCCGTTGACAGTCTCAGACCGACGA  
ACGCCGGTGTGACTCGAAAGGGACCGACGATCACCTCACCACCAGCA  
TGGATAAGGCATCTGTAGAGAGTCAGCTTCCGAGAAGAGAGCCATTGG  
AGACGGAGCCAGATGAACAAGAAGTTCATTTTCAGGAAGCGAGGCGTCC  
GTTCCGACGCTGAAGTGACTGACGACAACATCTACGAGGAGCACACTG  
ATCGTAAAGTGGTTCCGAGGAAGTCGGAGGGCAAGCGAAGCTTCAA  
GACTTGCTGAAGAAGCTCGCGCTGCCGGCTGTTGGTATGGGTGCATC  
GTATTTTGCCGCTGATAGAATTCTGCCGGAACATAACAGAGCAGCAACA  
GACAGGCGAAGAACCCTAACCACCGGCCAGAATGTGAGCACTGTGTT  
AGGCTTCGCAGCGCTTGCTGCTGCCGCAGCGTTCCTTGGCATGGGTG  
TCACGAGGACGTACCGACATTTTTCCCCACGCAAAAACAGATCACGGC  
AGCCTGCACTCGAGCAAGAGGTGCCTGAATCAGGCGAAGATGGGGAG  
GATGCCCGCCAGTAGGATATGGGGGCTAATAAAAGTGAGTAGGAGCTC  
GAGGACAGTGTCCCGAACGCGCCTGAGAGGCAGACAGACACAGAAGAG  
TGAAGAAAAACAACATGGTATTACGTGC

>TgGoatJpOk8

AAATGGCCCGACACGCAATTTTTTTTCGCGCTTTGTGTTTTAGGCCTGG  
TGGCGGCGGCTTTGCCCCAGTTCGCTACCGCGGCCACCGCGTCAGAT  
GACGAACTGATGAGTCGAATCCGAAATTTCTGACTTTTTTCGATGGTCAA  
GCACCCGTTGACAGTCTCAGACCGACGAACGCCGGTGTGACTCGAAA  
GGGACCGACGATCACCTCACCACCAGCATGGATAAGGCATCTGTAGAG  
AGTCAGCTTCCGAGAAGAGAGCCATTGGAGACGGAGCCAGATGAACAA  
GAAGAAGTTCATTTTCAGGAAGCGAGGCGTCCGTTCCGACGCTGAAGT



GACTGACGACAACATCTACGAGGAGCACACTGATCGTAAAGTGGTTCC  
GAGGAAGTCGGAGGGCAAGCGAAGCTTCAAAGACTTGCTGAAGAAGC  
TCGCGCTGCCGGCTGTTGGTATGGGTGCATCGTATTTTGCCGCTGAT  
AGAATTCTGCCGGAAC TAACAGAGCAGCAACAGACAGGCGAAGAACCC  
CTAACCACCGGCCAGAATGTGAGCACTGTGTTAGGCTTCGCAGCGCTT  
GCTGCTGCCGCAGCGTTCCTTGGCATGGGTCTCACGAGGACGTACCG  
ACATTTTTCCCCACGCAAAAACAGATCACGGCAGCCTGCACTCGAGCA  
AGAGGTGCCTGAATCAGGCCAAGATGGGGAGGATGCCCCGCCAGTAGG  
ATATGGGGGCTAATAAAAAGTGAGTAGGAGCTCGAGGACAGTGTCCCGA  
ACGCGCCTGAGAGGCAGACAGACACAGAAGAGTGAAGAAAAACAACAT  
GGTATT

>TgGoatJpOk9

CGTCTCATTTCCAAAATGGCCCGACACGCAATTTTTTTTCGCGCTTTGT  
GTTTTAGGCCTGGTGGCGGGCTTTGCCCCAGTTCGCTACCGCGGC  
CACCGCGTCAGATGACGAAC TATGAGTCGAATCCGAAATTCTGACTT  
TTTCGATGGTCAAGCACCCGTTGACAGTCTCAGACCGACGAACGCCGG  
TGTCGACTCGAAAAGGGACCGACGATCACCTCACCACCAGCATGGATA  
AGGCATCTGTAGAGAGTCAGCTTCCGAGAAGAGAGCCATTGGAGACGG  
AGCCAGATGAACAAGAAGTTCATTT CAGGAAGCGAGGCGTCCGTTCCG  
ACGCTGAAGTGACTGACGACAACATCTACGAGGAGCACACTGATCGTA  
AAGTGGTTCCGAGGAAGTCGGAGGGCAAGCGAAGCTTCAAAGACTTG  
CTGAAGAAGCTCGCGCTGCCGGCTGTTGGTATGGGTGCATCGTATTT  
TGCCGCTGATAGAATTCTGCCGGAAC TAACAGAGCAGCAACAGACAGG  
CGAAGAACCCCTAACCACCGGCCAGAATGTGAGCACTGTGTTAGGCTT  
CGCAGCGCTTGCTGCTGCCGCAGCGTTCCTTGGCATGGGTCTCACGA  
GGACGTACCGACATTTTTCCCCACGCAAAAACAGATCACGGCAGCCTG  
CACTCGAGCAAGAGGTGCCTGAATCAGGCCAAGATGGGGGAGGATGC  
CCGCCAGTAGGATATGGGGGCTAATAAAAAGTGAGTAGGAGCTCGAGGA  
CAGTGTCCCGAACGCGCCTGAGAGGCAGACAGACACAGAAGANTGAAG  
AAAAACAACATGGTATTACGTGCCGGTGAGTGT TTGCTGTCACGT

>TgGoatJpOk10

T TACTGCGGCGTCTCATTTCCAAAATGGCCCGACACGCAATTTTTTTTC  
GCGCTTTGTGTTTTAGGCCTGGTGGCGGGCTTTGCCCCAGTTCGC  
TACCGCGGCCACCGCGTCAGATGACGAAC TATGAGTCGAATCCGAAA

TTCTGACTTTTTTCGATGGTCAAGCACCCGTTGACAGTCTCAGACCGAC  
GAACGCCGGTGTCTGACTCGAAAGGGACCGACGATCACCTCACCACCAG  
CATGGATAAGGCATCTGTAGAGAGTCAGCTTCCGAGAAGAGAGCCATT  
GGAGACGGAGCCAGATGAACAAGAAGTTCATTTTCAGGAAGCGAGGCGT  
CCGTTCCGACGCTGAAGTGACTGACGACAACATCTACGAGGAGCACAC  
TGATCGTAAAGTGGTTCCGAGGAAGTCGGAGGGCAAGCGAAGCTTCA  
AAGACTTGCTGAAGAAGCTCGCGCTGCCGGCTGTTGGTATGGGTGCA  
TCGTATTTTGGCCGCTGATAGAATTCTGCCGGAACACTAACAGAGCAGCAA  
CAGACAGGCGAAGAACCCCTAACCACCGGCCAGAATGTGAGCACTGTG  
TTAGGCTTCGCAGCGCTTGCTGCTGCCGCAGCGTTCCTTGGCATGGG  
TCTCACGAGGACGTACCGACATTTTTTCCCCACGCAAAAACAGATCACG  
GCAGCCTGCACTCGAGCAAGAGGTGCCTGAATCAGGCGAAGATGGGG  
GAGGATGCCCCGCCAGTAGGATATGGGGGCTAATAAAAAGTGAGTAGGAG  
CTCGAGGACAGTGTCCCGAACGCGCCTGAGAGGCAGACAGACACAGAA  
GAGTGAAGAAAAACNACATGGTAT

>TgGoatJpOk11

TTTCCAAAATGGCCCGACACGCAATTTTTTTTCGCGCTTTGTGTTTTAG  
GCCTGGTGGCGGGCGGCTTTGCCCCAGTTCGCTACCGCGGCCACCGCG  
TCGGATGACGAACCTGATGAGTCGAATCCGAAATTCTGACTTTTTTCGAT  
GGTCAAGCACCCGTTGACAGTCTCAGACCGACGAACGCCGGTGTCTGAC  
TCGAAAGGGACCGACGATCACCTCACCACCAGCATGGATAAGGCATCT  
GTAGAGAGTCAGCTTCCGAGAAGAGAGCCATTGGAGACGGAGCCAGAT  
GAACAAGAAGAAGTTCATTTTCAGGAAGCGAGGGCGTCGGTTCCGACGCT  
GAAGTGACTGACGACCACATCTACGAGGAGAACACTGATCGTAAAGTG  
GTTCCGAGGAAGTCGGAGGGCAAGCGAAGCTTCAAAGACTTGCTGAA  
GAAGCTCGCGCTGCCGGCTGTTGGTATGGGTGCATCGTATTTTGGCCG  
CTGATAGAATTCTGCCGGAACACTAACAGAGCAGCAACAGACAGGCGACG  
AACCCCTATCCACCGGCCAGAATGTGAGCACTGTGATAGGCTTCGCAG  
CGTTGCTGCTGCCGTAGCGTTCCTTGGCCTGGGTATCAAGAGGACG  
TACCGACATTTTTTCCCCACGCAAAAACAGATCACGGCAGCCTGCACCC  
GAGCACGAGGTGCCTGAATCAGGCGAAGATAGGGAGGATGCCCCCCA  
GTAGGATATGGGGGCTAATAAAAAGTGAGTAGGAGCTCGAGGACAGTGT  
CCCGAACGCGCCTGAGAGGCAGAGAGACACAGAAGAGTGA

Surface antigen gene 1 (SAG1)

>GT1

ATGTCGGTTTCGCTGCACCACTTCATTATTTCTTCTGGTTTTTTTGACG  
AGTATGTTTTCCGAAGGCAGTGAGACGCGCCGTCACGGCAGGGGTGTT  
TGCCGCGCCCACACTGATGTCGTTCTTGCGATGTGGCGTTATGGCAT  
CGGATCCCCCTCTTGTTGCCAATCAAGTTGTCACCTGCCAGATAAAA  
AATCGACAGCCGCGGTCATTCTCACACCGACGGAGAACCACTTCACTC  
TCAAGTGCCCTAAAACAGCGCTCACAGAGCCTCCCCTCTTGCGTACT  
CACCCAACAGGCAAATCTGCCAGCGGGTACTACAAGTAGCTGTACATC  
AAAGGCTGTAACATTGAGCTCCTTGATTCCTGAAGCAGAAGATAGCTG  
GTGGACGGGGGATTCTGCTAGTCTCGACACGGCAGGCATCAAACCTCAC  
AGTTCCAATCGAGAAGTTCCCCGTGACAACGCAGACGTTTGTGGTCCG  
TTGCATCAAGGGAGACGACGCACAGAGTTGTATGGTCACGGTGACAGT  
ACAAGCCAGAGCCTCATCGGTCGTCAATAATGTCGCAAGGTGCTCCTA  
CGGTGCAGACAGCACTCTTGGTCCTGTCAAGTTGTCTGCGGAAGGAC  
CCACTACAATGACCCTCGTGTGCGGGAAAGATGGAGTCAAAGTTCCTC  
AAGACAACAATCAGTACTGTTCCGGGACGACGCTGACTGGTTGCAACG  
AGAAATCGTTCAAAGATATTTTGCCAAAATTAAGTGAAGAACCCGTGGCA  
GGGTAACGCTTCGAGTGATAAGGGTGCCACGCTAACGATCAAGAAGGA  
AGCATTTCAGCCGAGTCAAAAAGCGTCATTATTGGATGCACAGGGGG  
ATCGCCTGAGAAGCATCACTGTACCGTGAAACTGGAGTTTGCCGGGGC  
TGCAGGGTCAGCAAATCGGCTGCGGGAACAGCCAGTCACGTTTCCAT  
TTTTGCCATGGTGATCGGACTTATTGGCTCTATCGCAGCTTGTGTGCG  
GTGA

>ME49

ATGTCGGTTTCGCTGCACCACTTCATTATTTCTTCTGGTTTTTTTGGCG  
AGTATGTTTTCCGAAGGCAGTGAGACGCGCCGTCACGGCAGGGGTGTT  
TGCCGCGCCCACACTGATGTCGTTCTTGCGATGTGGCGCTATGGCAT  
CGGATCCCCCTCTTGTTGCCAATCAAGTTGTCACCTGCCAGATAAAA  
AATCGACAGCCGCGGTCATTCTCACACCGACGGAGAACCACTTCACTC  
TCAAGTGCCCTAAAACAGCGCTCACAGAGCCTCCCCTCTTGCGTACT  
CACCCAACAGGCAAATCTGCCAGCGGGTACTACAAGTAGCTGTACATC  
AAAGGCTGTAACATTGAGCTCCTTGATTCCTGAAGCAGAAGATAGCTG  
GTGGACGGGGGATTCTGCTAGTCTCGACACGGCAGGCATCAAACCTCAC

AGTTCCAATCGAGAAGTTCCCCGTGACAACGCAGACGTTTGTGGTCCG  
TTGCATCAAGGGAGACGACGCACAGAGTTGTATGGTCACAGTGACAGT  
ACAAGCCAGAGCCTCATCGGTTCGTCAATAATGTCGCAAGGTGCTCCTA  
CGGTGCAAACAGCACTCTTGGTCCTGTCAAGTTGTCTGCGGAAGGAC  
CCACTACAATGACCCTCGTGTGCGGGAAAGATGGAGTCAAAGTTCCTC  
AAGACAACAATCAGTACTGTTCCGGGACGACGCTGACTGGTTGCAACG  
AGAAATCGTTCAAAGATATTTTGCCAAAATTAAGTGAGAACCCGTGGC  
AGGGTAACGCTTCGAGTGATAATGGTGCCACGCTAACGATCAACAAGG  
AAGCATTTCCAGCCGAGTCAAAAAGCGTCATTATTGGATGCACAGGGG  
GATCGCCTGAGAAGCATCACTGTACCGTGCAACTGGAGTTTGCCGGG  
GCTGCAGGGTCAGCAAATCGTCTGCGGGAACAGCCAGTCACGTTTCC  
ATTTTCGCCATGGTGACCGGACTTATTGGCTCTATCGCAGCTTGTGTC  
GCGTGA

>VEG

ATGTCGGTTTCGCTGCACCACTTCATTATTTCTTCTGGTTTTTTGGCG  
AGTATGTTTCCGAAGGCAGTGAGACGCGCCGTCACGGCAGGGGTGTT  
TGCCGCGCCCACACTGATGTCGTTCTTGCGATGTGGCGCTATGGCAT  
CGGATCCCCCTCTTGTTGCCAATCAAGTTGTCACCTGCCAGATAAAA  
AATCGACAGCCGCGGTCATTCTCACACCGACGGAGAACCACTTCACTC  
TCAAGTGCCCTAAAACAGCGCTCACAGAGCCTCCCCTCTTGCGTACT  
CACCCAACAGGCAAATCTGCCAGCGGGTACTACAAGTAGCTGTACATC  
AAAGGCTGTAACATTGAGCTCCTTGATTCTGAAGCAGAAGATAGCTG  
GTGGACGGGGGATTCTGCTAGTCTCGACACGGCAGGCATCAAATCAC  
AGTTCCAATCGAGAAGTTCCCCGTGACAACGCAGACGTTTGTGGTCCG  
TTGCATCAAGGGAGACGACGCACAGAGTTGTATGGTCACAGTGACAGT  
ACAAGCCAGAGCCTCATCGGTTCGTCAATAATGTCGCAAGGTGCTCCTA  
CGGTGCAAACAGCACTCTTGGTCCTGTCAAGTTGTCTGCGGAAGGAC  
CCACTACAATGACCCTCGTGTGCGGGAAAGATGGAGTCAAAGTTCCTC  
AAGACAACAATCAGTACTGTTCCGGGACGACGCTGACTGGTTGCAACG  
AGAAATCGTTCAAAGATATTTTGCCAAAATTAAGTGAGAACCCGTGGC  
AGGGTAACGCTTCGAGTGATAATGGTGCCACGCTAACGATCAACAAGG  
AAGCATTTCCAGCCGAGTCAAAAAGCGTCATTATTGGATGCACAGGGG  
GATCGCCTGAGAAGCATCACTGTACCGTGCAACTGGAGTTTGCCGGG  
GCTGCAGGGTCAGCAAATCGTCTGCGGGAACAGCCAGTCACGTTTCC  
ATTTTCGCCATGGTGACCGGACTTATTGGCTCTATCGCAGCTTGTGTC

GCGTGA

>MAS

ATGTCGGTTTCGCTGCACCACTTCATTATTTCTTCTGGTTTTTTTGACG  
AGTATGTTTTCCGAAGGCAGTGAGACGCGCCGTCACGGCAGGGGTGTT  
TGCCGCGCCCACACTGATGTCGTTCTTGCGATGTGGCGCTATGGCAT  
CGGATCCCCCTCTTGTTGCCAATCAAGTTGTCACCTGCCAGATAAAA  
AATCGACAGCCGCGGTCATTCTCACACCGACGGAGAACCACTTCACTC  
TCAAGTGCCCTAAAACAGCGCTCACAGAGCCTCCCCTCTTGCGTACT  
CACCCAACAGGCAAATCTGCCAGCGGGTACTACAAGTAGCTGTACATC  
AAAGGCTGTAACATTGAGCTCCTTGATTCCTGAAGCAGAAGATAGCTG  
GTGGACGGGGGATTCTGCTAGTCTCGACACGGCAGGCATCAAACCTCAC  
AGTTCCAATCGAGAAGTTCCCCGTGACAACGCAGACGTTTGTGGTCCG  
TTGCATCAAGGGAGACGACGCACAGAGTTGTATGGTCACAGTGACAGT  
ACAAGCCAGAGCCTCATCGGTCGTCAATAATGTCGCAAGGTGCTCCTA  
CGGTGCAAACAGCACTCTTGGTCCTGTCAAGTTGTCTGCGGAAGGAC  
CCACTACAATGACCCTCGTGTGCGGGAAAGATGGAGTCAAAGTTCCTC  
AAGACAACAATCAGTACTGTTCCGGGACGACGCTGACTGGTTGCAACG  
AGAAATCGTTCAAAGATATTTTGCCAAAATTAAGTGAAGAACCCTGGCA  
GGGTAACGCTTCGAGTGATAAGGGTGCCACGCTAACGATCAAGAAGGA  
AGCATTTCAGCCGAGTCAAAAAGCGTCATTATTGGATGCACAGGGGG  
ATCGCCTGAGAAGCATCACTGTACCGTGAAACTGGAGTTTGCCGGGGC  
TGCAGGGTCAGCAAATCGGCTGCGGGAACAGCCAGTCACGTTTCCAT  
TTTTGCCATGGTGACCGGACTTATTGGCTCTATCGCAGCTTGTGTGCG  
GTGA

>RUB

ATGTCGGTTTCGCTGCACCACTTCATTATTTCTTCTGGTTTTTTTGACG  
AGTATGTTTTCCGAAGGCAGTGAGACGCGCCGTCACGGCAGGGGTGTT  
TGCCGCGCCCACACTGATGTCGTTCTTGCGATGTGGCGTTATGGCAT  
CGGATCCCCCTCTTGTTGCCAATCAAGTTGTCACCTGCCAGATAAAA  
AATCGACAGCCGCGGTCATTCTCACACCGACGGAGAACCACTTCACTC  
TCAAGTGCCCTAAAACAGCGCTCACAGAGCCTCCCCTCTTGCGTACT  
CACCCAACAGGCAAATCTGCCAGCGGGTACTACAAGTAGCTGTACATC  
AAAGGCTGTAACATTGAGCTCCTTGATTCCTGAAGCAGAAGATAGCTG  
GTGGACGGGGGATTCTGCTAGTCTCGACACGGCAGGCATCAAACCTCAC

AGTTCCAATCGAGAAGTTCCCCGTGACAACGCAGACGTTTGTGGTCCG  
TTGCATCAAGGGAGATGACGCACAGAGTTGTATGGTCACAGTGACAGT  
ACAAGCCAGAGCCTCATCGGTCGTCAATAATGTCGCAAGGTGCTCCTA  
CGGTGCAGACAGCACTCTTGGTCCTGTCAAGTTGTCTGCGGAAGGAC  
CCACTACAATGACCCTCGTGTGCGGGAAAGATGGAGTCAAAGTTCCTC  
AAGACAACAATCAGTACTGTTCCGGGACGACGCTGACTGGTTGCAACG  
AGAAATCGTTCAAAGATATTTTGCCAAAATTAAGTGAAGAACCCGTGGCA  
GGGTAACGCTTCGAGTGATAAGGGTGCCACGCTAACGATCAAGAAGGA  
AGCATTTCAGCCGAGTCAAAAAGCGTCATTATTGGATGCACAGGGGG  
ATCGCCTGAGAAGCATCACTGTACCGTGAAACTGGAGTTTGCCGGGGC  
TGCAGGGTCAGCAAATCGGCTGCGGGAACAGCCAGTCACGTTTCCAT  
TCTTGCCATGGTGATCGGACTTATTGGCTCTATCGCAGCTTGTGTGCG  
GTGA

>FOU

ATGTCGGTTTCGCTGCACCACTTCATTATTTCTTCTGGTTTTTTGACG  
AGTATGTTTCCGAAGGCAGTGAGACGCGCCGTCACGGCAGGGGTGTT  
TGCCGCGCCACACTGATGTCGTTCTTGCGATGTGGCGTTATGGCAT  
CGGATCCCCCTCTTGTTGCCAATCAAGTTGTCACCTGCCAGATAAAA  
AATCGACAGCCGCGGTCATTCTCACACCGACGGAGAACCACTTCACTC  
TCAAGTGCCCTAAAACAGCGCTCACAGAGCCTCCCCTCTTGCGTACT  
CACCCAACAGGCAAATCTGCCAGCGGGTACTACAAGTAGCTGTACATC  
AAAGGCTGTAACATTGAGCTCCTTGATTCTGAAGCAGAAGATAGCTG  
GTGGACGGGGGATTCTGCTAGTCTCGACACGGCAGGCATCAAATCAC  
AGTTCCAATCGAGAAGTTCCCCGTGACAACGCAGACGTTTGTGGTCCG  
TTGCATCAAGGGAGACGACGCACAGAGTTGTATGGTCACAGTGACAGT  
ACAAGCCAGAGCCTCATCGGTCGTCAATAATGTCGCAAGGTGCTCCTA  
CGGTGCAGACAGCACTCTTGGTCCTGTCAAGTTGTCTGCGGAAGGAC  
CCACTACAATGACCCTCGTGTGCGGGAAAGATGGAGTCAAAGTTCCTC  
AAGACAACAATCAGTACTGTTCCGGGACGACGCTGACTGGTTGCAACG  
AGAAATCGTTCAAAGATATTTTGCCAAAATTAAGTGAAGAACCCGTGGCA  
GGGTAACGCTTCGAGTGATAAGGGTGCCACGCTAACGATCAAGAAGGA  
AGCATTTCAGCCGAGTCAAAAAGCGTCATTATTGGATGCACAGGGGG  
ATCGCCTGAGAAGCATCACTGTACCGTGAAACTGGAGTTTGCCGGGGC  
TGCAGGGTCAGCAAATCGGCTGCGGGAACAGCCAGTCACGTTTCCAT  
TTTTGCCATGGTGATCGGACTTATTGGCTCTATCGCAGCTTGTGTGCG

GTGA

>CAST

ATGTCGGTTTTCGCTGCACCACTTCATTATTTCTTCTGGTTTTTTTGACG  
AGTATGTTTTCCGAAGGCAGTGAGACGCGCCGTCACGGCAGGGGTGTT  
TGCCGCGCCCACACTGATGTCGTTCTTGCGATGTGGCGTTATGGCAT  
CGGATCCCCCTCTTGTTGCCAATCAAGTTGTCACCTGCCCAGATAAAA  
AATCGACAGCCGCGGTCATTCTCACACCGACGGAGAACCACTTCACTC  
TCAAGTGCCCTAAAACAGCGCTCACAGAGCCTCCCCTCTTGCGTACT  
CACCCAACAGGCAAATCTGCCCAGCGGGTACTACAAGTAGCTGTACATC  
AAAGGCTGTAACATTGAGCTCCTTGATTCTGAAGCAGAAGATAGCTG  
GTGGACGGGGGATTCTGCTAGTCTCGACACGGCAGGCATCAAACCTCAC  
AGTTCCAATCGAGAAGTTCCCCGTGACAACGCAGACGTTTGTGGTCCG  
TTGCATCAAGGGAGACGACGCACAGAGTTGTATGGTCACAGTGACAGT  
ACAAGCCAGAGCCTCATCGGTCGTCAATAATGTCGCAAGGTGCTCCTA  
CGGTGCAGACAGCACTCTTGGTCCGTCAAGTTGTCTGCGGAAGGAC  
CCACTACAATGACCCTCGTGTGCGGGAAAGATGGAGTCAAAGTTCCTC  
AAGACAACAATCAGTACTGTTCCGGGACGACGCTGACTGGTTGCAACG  
AGAAATCGTTCAAAGATATTTTGCCAAAATTAAGTGAAGAACCCTGGCA  
GGGTAACGCTTCGAGTGATAAGGGTGCCACGCTAACGATCAAGAAGGA  
AGCATTTCAGCCGAGTCAAAAAGCGTCATTATTGGATGCACAGGGGG  
ATCGCCTGAGAAGCATCACTGTACCGTGAAACTGGAGTTTGCCGGGGC  
TGCAGGGTCAGCAAATCGGCTGCGGGAACAGCCAGTCACGTTTCCAT  
TTTTGCCATGGTGATCGGACTTATTGGCTCTATCGCAGCTTGTGTGCG  
GTGA

>TgCatBr5

TGTCGGTTTTCGCTGCACCACTTCATTATTTCTTCTGGTTTTTTTGACGA  
GTATGTTTTCCGAAGGCAGTGAGACGCGCCGTCACGGCAGGGGTGTTT  
GCCGCGCCCACACTGATGTCGTTCTTGCGATGTGGCGTTATGGCATC  
GGATCCCCCTCTTGTTGCCAATCAAGTTGTCACCTGCCCAGATAAAA  
ATCGACAGCCGCGGTCATTCTCACACCGACGGAGAACCACTTCACTCT  
CAAGTGCCCTAAAACAGCGCTCACAGAGCCTCCCCTCTTGCGTACTC  
ACCCAACAGGCAAATCTGCCCAGCGGGTACTACAAGTAGCTGTACATCA  
AAGGCTGTAACATTGAGCTCCTTGATTCTGAAGCAGAAGATAGCTGG  
TGGACGGGGGATTCTGCTAGTCTCGACACGGCAGGCATCAAACCTCACA

GTTCCAATCGAGAAGTTCCCCGTGACAACGCAGACGTTTGTGGTTCGGT  
TGCATCAAGGGAGACGACGCACAGAGTTGTATGGTCACAGTGACAGTA  
CAAGCCAGAGCCTCATCGGTCGTCAATAATGTCGCAAGGTGCTCCTAC  
GGTGCAGACAGCACTCTTGGTCCTGTCAAGTTGTCTGCGGAAGGACC  
CACTACAATGACCCTCGTGTGCGGGAAAGATGGAGTCAAAGTTCCTCA  
AGACAACAATCAGTACTGTTCCGGGACGACGCTGACTGGTTGCAACGA  
GAAATCGTTCAAAGATATTTTGCCAAAATTAAGTGAAGACCCGTGGCA  
GGGTAACGCTTCGAGTGATAAGGGTGCCACGCTAACGATCAAGAAGGA  
AGCATTTCAGCCGAGTCAAAAAGCGTCATTATTGGATGCACAGGGGG  
ATCGCCTGAGAAGCATCACTGTACCGTGAAACTGGAGTTTGCCGGGGC  
TGCAGGGTCAGCAAATCGGCTGCGGGAACAGCCAGTCACGTTTCCAT  
TTTTGCCATGGTGATCGGACTTATTGGCTCTATCGCAGCTTGTGTGCG  
GTGA

>p89

ATGTCGGTTTCGCTGCACCACTTCATTATTTCTTCTGGTTTTTTTGACG  
AGTATGTTTCCGAAGGCAGTGAGACGCGCCGTCACGGCAGGGGTGTT  
TGCCGCGCCCACACTGATGTCGTTCTTGCGATGTGGCGTTATGGCAT  
CGGATCCCCCTCTTGTTGCCAATCAAGTTGTCACCTGCCAGATAAAA  
AATCGACAGCCGCGGTCATTCTCACACCGACGGAGAACCACTTCACTC  
TCAAGTGCCCTAAAACAGCGCTCACAGAGCCTCCCCTCTTGCGTACT  
CACCCAACAGGCAAATCTGCCAGCGGGTACTACAAGTAGCTGTACATC  
AAAGGCTGTAACATTGAGCTCCTTGATTCTGAAGCAGAAGATAGCTG  
GTGGACGGGGGATTCTGCTAGTCTCGACACGGCAGGCATCAAATCAC  
AGTTCCAATCGAGAAGTTCCCCGTGACAACGCAGACGTTTGTGGTTCGG  
TTGCATCAAGGGAGACGACGCACAGAGTTGTATGGTCACAGTGACAGT  
ACAAGCCAGAGCCTCATCGGTCGTCAATAATGTCGCAAGGTGCTCCTA  
CGGTGCAGACAGCACTCTTGGTCCTGTCAAGTTGTCTGCGGAAGGAC  
CCACTACAATGACCCTCGTGTGCGGGAAAGATGGAGTCAAAGTTCCTC  
AAGACAACAATCAGTACTGTTCCGGGACGACGCTGACTGGTTGCAACG  
AGAAATCGTTCAAAGATATTTTGCCAAAATTAAGTGAAGACCCGTGGCA  
GGGTAACGCTTCGAGTGATAAGGGTGCCACGCTAACGATCAAGAAGGA  
AGCATTTCAGCCGAGTCAAAAAGCGTCATTATTGGATGCACAGGGGG  
ATCGCCTGAGAAGCATCACTGTACCGTGAAACTGGAGTTTGCCGGGGC  
TGCAGGGTCAGCAAATCGGCTGCGGGAACAGCCAGTCACGTTTCCAT  
TTTTGCCATGGTGATCGGACTTATTGGCTCTATCGCAGCTTGTGTGCG



GTGA

>VAND

ATGTCGGTTTTCGCTGCACCACTTCATTATTTCTTCTGGTTTTTTTGACG  
AGTATGTTTTCCGAAGGCAGTGAGACGCGCCGTCACGGCAGGGGTGTT  
TGCCGCGCCCACACTGATGTCGTTCTTGCGATGTGGCGTTATGGCAT  
CGGATCCCCCTCTTGTTGCCAATCAAGTTGTCACCTGCCAGATAAAA  
AATCGACAGCCGCGGTCATTCTCACACCGACGGAGAACCACTTCACTC  
TCAAGTGCCCTAAAACAGCGCTCACAGAGCCTCCCCTCTTGCGTACT  
CACCCAACAGGCAAATCTGCCAGCGGGTACTACAAGTAGCTGTACATC  
AAAGGCTGTAACATTGAGCTCCTTGATTCCTGAAGCAGAAGATAGCTG  
GTGGACGGGGGATTCTGCTAGTCTCGACACGGCAGGCATCAAACCTCAC  
AGTTCCAATCGAGAAGTTCCCCGTGACAACGCAGACGTTTGTGGTCCG  
TTGCATCAAGGGAGACGACGCACAGAGTTGTATGGTCACAGTGACAGT  
ACAAGCCAGAGCCTCATCGGTCGTCAATAATGTCGCAAGGTGCTCCTA  
CGGTGCAGACAGCACTCTTGGTCCCTGTCAAGTTGTCTGCGGAAGGAC  
CCACTACAATGACCCTCGTGTGCGGGAAAGATGGAGTCAAAGTTCCTC  
AAGACAACAATCAGTACTGTTCCGGGACGACGCTGACTGGTTGCAACG  
AGAAATCGTTCAAAGATATTTTGCCAAAATTAAGTGAAGAACCCTGGCA  
GGGTAACGCTTCGAGTGATAAGGGTGCCACGCTAACGATCAACAAGGA  
AGCATTTCAGCCGAGTCAAAAAGCGTCATTATTGGATGCACAGGGGG  
ATCGCCTGAGAAGCATCACTGTACCGTGAAACTGGAGTTTGCCGGGGC  
TGCAGGGTCAGCAAATCGGCTGCGGGAACAGCCAGTCACGTTTCCAT  
TTTTGCCATGGTGATCGGACTTATTGGCTCTATCGCAGCTTGTGTGCG  
GTGA

>TgCgCa1

ATGTCGGTTTTCGCTGCACCACTTCATTATTTCTTCTGGTTTTTTTGACG  
AGTATGTTTTCCGAAGGCAGTGAGACGCGCCGTCACGGCAGGGGTGTT  
TGCCGCGCCCACACTGATGTCGTTCTTGCGATGTGGCGTTATGGCAT  
CGGATCCCCCTCTTGTTGCCAATCAAGTTGTCACCTGCCAGATAAAA  
AATCGACAGCCGCGGTCATTCTCACACCGACGGAGAACCACTTCACTC  
TCAAGTGCCCTAAAACAGCGCTCACAGAGCCTCCCCTCTTGCGTACT  
CACCCAACAGGCAAATCTGCCAGCGGGTACTACAAGTAGCTGTACATC  
AAAGGCTGTAACATTGAGCTCCTTGATTCCTGAAGCAGAAGATAGCTG  
GTGGACGGGGGATTCTGCTAGTCTCGACACGGCAGGCATCAAACCTCAC

AGTTCCAATCGAGAAGTTCCCCGTGACAACGCAGACGTTTGTGGTCCG  
TTGCATCAAGGGAGACGACGCACAGAGTTGTATGGTCACAGTGACAGT  
ACAAGCCAGAGCCTCATCGGTCGTCAATAATGTCGCAAGGTGCTCCTA  
CGGTGCAGACAGCACTCTTGGTCCTGTCAAGTTGTCTGCGGAAGGAC  
CCACTACAATGACCCTCGTGTGCGGGAAAGATGGAGTCAAAGTTCCTC  
AAGACAACAATCAGTACTGTTCCGGGACGACGCTGACTGGTTGCAACG  
AGAAATCGTTCAAAGATATTTTGCCAAAATTAAGTGAAGAACCCGTGGCA  
GGGTAACGCTTCGAGTGATAAGGGTGCCACGCTAACGATCAAGAAGGA  
AGCATTTCAGCCGAGTCAAAAAGCGTCATTATTGGATGCACAGGGGG  
ATCGCCTGAGAAGCATCACTGTACCGTGAAACTGGAGTTTGCCGGGGC  
TGCAGGGTCAGCAAATCGGCTGCGGGAACAGCCAGTCACGTTTCCG  
TTTTTGCCATGGTGATCGGACTTATTGGCTCTATCGCAGCTTGTGTGCG  
CGTGA

>ARI

ATGTCGGTTTCGCTGCACCACTTCATTATTTCTTCTGGTTTTTTTGGCG  
AGTATGTTTCCGAAGGCAGTGAGACGCGCCGTCACGGCAGGGGTGTT  
TGCCGCGCCCACACTGATGTCGTTCTTGCGATGTGGCGCTATGGCAT  
CGGATCCCCCTCTTGTTGCCAATCAAGTTGTCACCTGCCAGATAAAA  
AATCGACAGCCGCGGTCATTCTCACACCGACGGAGAACCACTTCACTC  
TCAAGTGCCCTAAAACAGCGCTCACAGAGCCTCCCCTCTTGCGTACT  
CACCCAACAGGCAAATCTGCCAGCGGGTACTACAAGTAGCTGTACATC  
AAAGGCTGTAACATTGAGCTCCTTGATTCTGAAGCAGAAGATAGCTG  
GTGGACGGGGGATTCTGCTAGTCTCGACACGGCAGGCATCAAACCTCAC  
AGTTCCAATCGAGAAGTTCCCCGTGACAACGCAGACGTTTGTGGTCCG  
TTGCATCAAGGGAGACGACGCACAGAGTTGTATGGTCACAGTGACAGT  
ACAAGCCAGAGCCTCATCGGTCGTCAATAATGTCGCAAGGTGCTCCTA  
CGGTGCAAACAGCACTCTTGGTCCTGTCAAGTTGTCTGCGGAAGGAC  
CCACTACAATGACCCTCGTGTGCGGGAAAGATGGAGTCAAAGTTCCTC  
AAGACAACAATCAGTACTGTTCCGGGACGACGCTGACTGGTTGCAACG  
AGAAATCGTTCAAAGATATTTTGCCAAAATTAAGTGAAGAACCCGTGGC  
AGGGTAACGCTTCGAGTGATAATGGTGCCACGCTAACGATCAACAAGG  
AAGCATTTCAGCCGAGTCAAAAAGCGTCATTATTGGATGCACAGGGG  
GATCGCCTGAGAAGCATCACTGTACCGTGCAACTGGAGTTTGCCGGG  
GCTGCAGGGTCAGCAAATCGTCTGCGGGAACAGCCAGTCACGTTTCC  
ATTTTCGCCATGGTGACCGGACTTATTGGCTCTATCGCAGCTTGTGTGTC

GCGTGA

>TgCtPRC2

TGTCGGTTTTCGCTGCACCACTTCATTATTTCTTCTGGTTTTTTTGGCGA  
GTATGTTTTCCGAAGGCAGTGAGACGCGCCGTCACGGCAGGGGTGTTT  
GCCGCGCCCACTGATGTCGTTCTTGCGATGTGGCGCTATGGCATC  
GGATCCCCCTCTTGTTGCCAATCAAGTTGTCACCTGCCCAGATAAAAA  
ATCGACAGCCGCGGTCATTCTCACACCGACGGAGAACCACTTCACTCT  
CAAGTGCCCTAAAACAGCGCTCACAGAGCCTCCCACTCTTGCGTACTC  
ACCCAACAGGCAAATCTGCCCAGCGGGTACTACAAGTAGCTGTACATCA  
AAGGCTGTAACATTGAGCTCCTTGATTCCTGAAGCAGAAGATAGCTGG  
TGGACGGGGGATTCTGCTAGTCTCGACACGGCAGGCATCAAACCTCACA  
GTTCCAATCGAGAAGTTCCCCGTGACAACGCAGACGTTTGTGGTCCGGT  
TGCATCAAGGGAGACGACGCACAGAGTTGTATGGTCACAGTGACAGTA  
CAAGCCAGAGCCTCATCGGTCGTCAATAATGTCGCAAGGTGCTCCTAC  
GGTGCAAACAGCACTCTTGGTCCTGTCAAGTTGTCTGCGGAAGGACC  
CACTACAATGACCCTCGTGTGCGGGAAAGATGGAGTCAAAGTTCCTCA  
AGACAACAATCAGTACTGTTCCGGGACGACGCTGACTGGTTGCAACGA  
GAAATCGTTCAAAGATATTTTGCCAAAATTAAGTGAGAACCCGTGGCA  
GGGTAACGCTTCGAGTGATAATGGTGCCACGCTAACGATCAACAAGGA  
AGCATTTCAGCCGAGTCAAAAAGCGTCATTATTGGATGCACAGGGGG  
ATCGCCTGAGAAGCATCACTGTACCGTGCAACTGGAGTTTGCCGGGG  
CTGCAGGGTCAGCAAATCGTCTGCGGGAACAGCCAGTCACGTTTCCA  
TTTTCGCCATGGTGACCGGACTTATTGGTTCTATCGCAGCTTGTGTCCG  
CGTGA

>GAB2-2007-GAL-DOM2

TGTCGGTTTTCGCTGCACCACTTCATTATTTCTTCTGGTTTTTTTGGACGA  
GTATGTTTTCCGAAGGCAGTGAGACGCGCCGTCACGGCAGGGGTGTTT  
GCCGCGCCCACTGATGTCGTTCTTGCGATGTGGCGTTATGGCATC  
GGATCCCCCTCTTGTTGCCAATCAAGTTGTCACCTGCCCAGATAAAAA  
ATCGACAGCCGCGGTCATTCTCACACCGACGGAGAACCACTTCACTCT  
CAAGTGCCCTAAAACAGCGCTCACAGAGCCTCCCACTCTTGCGTACTC  
ACCCAACAGGCAAATCTGCCCAGCGGGTACTACAAGTAGCTGTACATCA  
AAGGCTGTAACATTGAGCTCCTTGATTCCTGAAGCAGAAGATAGCTGG  
TGGACGGGGGATTCTGAAGTGCCCTAAAACAGCGCTCACAGAGCCTCC

CACTCTTGCGTACTCACCCAACAGGCAAATCTGCCAGCGGGTACTAC  
CTAGTCTCGACACGGCAGGCATCAAACCTCACAGTTCCAATCGAGAAGT  
TCCCCGTGACAACGCAGACGTTTGTGGTCGGTTGCATCAAGGGAGAC  
GACGCACAGAGTTGTATGGTCACAGTGACAGTACAAGCCAGAGCCTCA  
TCGGTCGTCAATAATGTCGCAAGGTGCTCCTACGGTGCAGACAGCACT  
CTTGGTCCTGTCAAGTTGTCTGCGGAAGGACCCACTACAATGACCCTC  
GTGTGCGGGAAAGATGGAGTCAAAGTTCCTCAAGACAACAATCAGTAC  
TGTTCCGGGACGACGCTGACTGGTTGCAACGAGAAATCGTTCAAAGAT  
ATTTTGCCAAAATTAACCTGAGAACCCGTGGCAGGGTAACGCTTCGAGT  
GATAAGGGTGCCACGCTAACGATCAAGAAGGAAGCATTTCCAGCCGAG  
TCAAAAAGCGTCATTATTGGATGCACAGGGGGATCGCCTGAGAAGCAT  
CACTGTACCGTGAAACTGGAGTTTGCCGGGGCTGCAGGGTCAGCAA  
ATCGGCTGCGGGAACAGCCAGTCACGTTTCCATTTTGGCATGGTGAT  
CGGACTTATTGGCTCTATCGCAGCTTGTGTGCGGTGA

>TgCtCo5

TGTCGGTTTTCGCTGCACCACTTCATTATTTCTTCTGGTTTTTTGACGA  
GTATGTTTCCGAAGGCAGTGAGACGCGCCGTACGGCAGGGGTGTTT  
GCCGCGCCCACTGATGTCGTTCTTGCGATGTGGCGTTATGGCATC  
GGATCCCCCTCTTGTTGCCAATCAAGTTGTCACCTGCCAGATAAAAA  
ATCGACAGCCGCGGTCATTCTCACACCGACGGAGAACCACTTCACTCT  
CAAGTGCCCTAAAACAGCGCTCACAGAGCCTCCCACTCTTGCGTACTC  
ACCCAACAGGCAAATCTGCCAGCGGGTACTACAAGTAGCTGTACATCA  
AAGGCTGTAACATTGAGCTCCTTGATTCCCTGAAGCAGAAGATAGCTGG  
TGGACGGGGGATTCTGCTAGTCTCGACACGGCAGGCATCAAACCTCACA  
GTTCCAATCGAGAAGTTCGCCGTGACAACGCAGACGTTTGTGGTCGGT  
TGCATCAAGGGAGACGACGCACAGAGTTGTATGGTCACAGTGACAGTA  
CAAGCCAGAGCCTCATCGGTCGTCAATAATGTCGCAAGGTGCTCCTAC  
GGTGCAGACAGCACTCTTGGTCCTGTCAAGTTGTCTGCGGAAGGACC  
CACTACAATGACCCTCGTGTGCGGGAAAGATGGAGTCAAAGTTCCTCA  
AGACAACAATCAGTACTGTTCCGGGACGACGCTGACTGGTTGCAACGA  
GAAATCGTTCAAAGATATTTTGCCAAAATTAACCTGAGAACCCGTGGCA  
GGGTAACGCTTCGAGTGATAAGGGTGCCACGCTAACGATCAAGAAGGA  
AGCATTTCCAGCCGAGTCAAAAAGCGTCATTATTGGATGCACAGGGGG  
ATCGCCTGAGAAGCATCACTGTACCGTGAAACTGGAGTTTGCCGGGGC  
TGCAGGGTCAGCAAATCGGCTGCGGGAACAGCCAGTCACGTTTCCAT

TTTTGCCATGGTGATCGGACTTATTGGCTCTATCGCAGCTTGTGTGCGC  
GTGA

>TgCatJpOk1

TGTCGGTTTTCGCTGCACCACTTCATTATTTCTTCTGGTTTTTTGACGA  
GTATGTTTTCCGAAGGCAGTGAGACGCGCCGTCACGGCAGGGGTGTTT  
GCCGCGCCCACTGATGTCGTTCTTGCGATGTGGCGTTATGGCATC  
GGATCCCCCTCTTGTTGCCAATCAAGTTGTCACCTGCCAGATAAAAA  
ATCGACAGCCGCGGTCATTCTCACACCGACGGAGAACCACTTCACTCT  
CAAGTGCCCTAAAACAGCGCTCACAGAGCCTCCCACTCTTGCGTACTC  
ACCCAACAGGCAAATCTGCCAGCGGGTACTACAAGTAGCTGTACATCA  
AAGGCTGTAACATTGAGCTCCTTGATTCTGAAGCAGAAGATAGCTGG  
TGGACGGGGGATTCTGCTAGTCTCGACACGGCAGGCATCAAACCTCACA  
GTTCCAATCGAGAAGTTCCCCGTGACAACGCAGACGTTTGTGGTTCGGT  
TGCATCAAGGGAGACGACGCACAGAGTTGTATGGTCACAGTGACAGTA  
CAAGCCAGAGCCTCATCGGTCGTCAATAATGTCGCAAGGTGCTCCTAC  
GGTGCAGACAGCACTCTTGGTCCTGTCAAGTTGTCTGCGGAAGGACC  
CACTACAATGACCCTCGTGTGCGGGAAAGATGGAGTCAAAGTTCTCTCA  
AGACAACAATCAGTACTGTTCCGGGACGACGCTGACTGGTTGCAACGA  
GAAATCGTTCAAAGATATTTTGCCAAAATTAAGTGAAGAACCCGTGGCA  
GGGTAACGCTTCGAGTGATAAGGGTGCCACGCTAACGATCAAGAAGGA  
AGCATTTCAGCCGAGTCAAAAAGCGTCATTATTGGATGCACAGGGGG  
ATCGCCTGAGAAGCATCACTGTACCGTGAAACTGGAGTTTGCCGGGGC  
TGCAGGGTCAGCAAATCGGCTGCGGGAACAGCCAGTCACGTTTCCAT  
TTTTGCCATGGTGATCGGACTTATTGGCTCTATCGCAGCTTGTGTGCGC  
GTGA

>TgCatJpOk2

TGTCGGTTTTCGCTGCACCACTTCATTATTTCTTCTGGTTTTTTGACGA  
GTATGTTTTCCGAAGGCAGTGAGACGCGCCGTCACGGCAGGGGTGTTT  
GCCGCGCCCACTGATGTCGTTCTTGCGATGTGGCGTTATGGCATC  
GGATCCCCCTCTTGTTGCCAATCAAGTTGTCACCTGCCAGATAAAAA  
ATCGACAGCCGCGGTCATTCTCACACCGACGGAGAACCACTTCACTCT  
CAAGTGCCCTAAAACAGCGCTCACAGAGCCTCCCACTCTTGCGTACTC  
ACCCAACAGGCAAATCTGCCAGCGGGTACTACAAGTAGCTGTACATCA  
AAGGCTGTAACATTGAGCTCCTTGATTCTGAAGCAGAAGATAGCTGG

TGGACGGGGGATTCTGCTAGTCTCGACACGGCAGGCATCAAACCTCACA  
GTTCCAATCGAGAAGTTCCCCGTGACAACGCAGACGTTTGTGGTTCGGT  
TGCATCAAGGGAGACGACGCACAGAGTTGTATGGTCACAGTGACAGTA  
CAAGCCAGAGCCTCATCGGTCGTCAATAATGTTCGCAAGGTGCTCCTAC  
GGTGCAGACAGCACTCTTGGTCCTGTCAAGTTGTCTGCGGAAGGACC  
CACTACAATGACCCTCGTGTGCGGGAAAGATGGAGTCAAAGTTCCTCA  
AGACAACAATCAGTACTGTTCCGGGACGACGCTGACTGGTTGCAACGA  
GAAATCGTTCAAAGATATTTTGCCAAAATTAAGTGAAGACCCCGTGGCA  
GGGTAACGCTTCGAGTGGATAAGGGTGCCACGCTAACGATCAAGAAGG  
AAGCATTTCCAGCCGAGTCAAAAAGCGTCATTATTGGATGCACAGGGG  
GATCGCCTGAGAAGCATCACTGTACCGTGAAACTGGAGTTTGCCGGG  
GCTGCAGGGTCAGCAAATCGGCTGCGGGAACAGCCAGTCACGTTTC  
CATTTTTGCCATGGTGATCGGACTTATTGGCTCTATCGCAGCTTGTGT  
CGCGTGA

>TgCatJpOk3

TGTCGGTTTTCGCTGCACCACTTCATTATTTCTTCTGGTTTTTTGGCGA  
GTATGTTTCCGAAGGCAGTGAGACGCGCCGTCACGGCAGGGGTGTTT  
GCCGCGCCCACTGATGTCGTTCTTGCGATGTGGCGCTATGGCATC  
GGATCCCCCTCTTGTGCAATCAAGTTGTCACCTGCCAGATAAAAA  
ATCGACAGCCGCGGTCATTCTCACACCGACGGAGAACCACTTCACTCT  
CAAGTGCCCTAAAACAGCGCTCACAGAGCCTCCCACTCTTGCGTACTC  
ACCCAACAGGCAAATCTGCCAGCGGGTACTACAAGTAGCTGTACATCA  
AAGGCTGTAACATTGAGCTCCTTGATTCCCTGAAGCAGAAGATAGCTGG  
TGGACGGGGGATTCTGCTAGTCTCGACACGGCAGGCATCAAACCTCACA  
GTTCCAATCGAGAAGTTCCCCGTGACAACGCAGACGTTTGTGGTTCGGT  
TGCATCAAGGGAGACGACGCACAGAGTTGTATGGTCACAGTGACAGTA  
CAAGCCAGAGCCTCATCGGTCGTCAATAATGTTCGCAAGGTGCTCCTAC  
GGTGCAAACAGCACTCTTGGTCCTGTCAAGTTGTCTGCGGAAGGACC  
CACTACAATGACCCTCGTGTGCGGGAAAGATGGAGTCAAAGTTCCTCA  
AGACAACAATCAGTACTGTTCCGGGACGACGCTGACTGGTTGCAACGA  
GAAATCGTTCAAAGATATTTTGCCAAAATTAAGTGAAGACCCCGTGGCA  
GGGTAACGCTTCGAGTGATAATGGTGCCACGCTAACGATCAACAAGGA  
AGCATTTCCAGCCGAGTCAAAAAGCGTCATTATTGGATGCACAGGGGG  
ATCGCCTGAGAAGCATCACTGTACCGTGCAACTGGAGTTTGCCGGGG  
CTGCAGGGTCAGCAAATCGTCTGCGGGAACAGCCAGTCACGTTTCCA

TTTTCGCCATGGTGACCGGACTTATTGGCTCTATCGCAGCTTGTGTGCG  
CGTGA

>TgCatJpOk4

TGTCGGTTTTCGCTGCACCACTTCATTATTTCTTCTGGTTTTTTGGCGA  
GTATGTTTCCGAAGGCAGTGAGACGCGCCGTCACGGCAGGGGTGTTT  
GCCGCGCCCACTGATGTCGTTCTTGCGATGTGGCGCTATGGCATC  
GGATCCCCCTCTTGTGCAATCAAGTTGTCACCTGCCAGATAAAAA  
ATCGACAGCCGCGGTCATTCTCACACCGACGGAGAACCACTTCACTCT  
CAAGTGCCCTAAAACAGCGCTCACAGAGCCTCCCACTCTTGCGTACTC  
ACCCAACAGGCAAATCTGCCAGCGGGTACTACAAGTAGCTGTACATCA  
AAGGCTGTAACATTGAGCTCCTTGATTCCTGAAGCAGAAGATAGCTGG  
TGGACGGGGGATTCTGCTAGTCTCGACACGGCAGGCATCAAACCTCACA  
GTTCCAATCGAGAAGTTCCCCGTGACAACGCAGACGTTTGTGGTTCGGT  
TGCATCAAGGGAGACGACGCACAGAGTTGTATGGTCACAGTGACAGTA  
CAAGCCAGAGCCTCATCGGTCGTCAATAATGTCGCAAGGTGCTCCTAC  
GGTGCAAACAGCACTCTTGGTCCTGTCAAGTTGTCTGCGGAAGGACC  
CACTACAATGACCCTCGTGTGCGGGAAAGATGGAGTCAAAGTTCCTCA  
AGACAACAATCAGTACTGTTCCGGGACGACGCTGACTGGTTGCAACGA  
GAAATCGTTCAAAGATATTTTGCCAAAATTAAGTGAGACCCCGTGGCA  
GGGTAACGCTTCGAGTGATAATGGTGCCACGCTAACGATCAACAAGGA  
AGCATTTCAGCCGAGTCAAAAAGCGTCATTATTGGATGCACAGGGGG  
ATCGCCTGAGAAGCATCACTGTACCGTGCAACTGGAGTTTGCCGGGG  
CTGCAGGGTCAAGCAAATCGTCTGCGGGAACAGCCAGTCACGTTTCCA  
TTTTCGCCATGGTGACCGGACTTATTGGCTCTATCGCAGCTTGTGTGCG  
CGTGA

>TgCatJpTy1/k-3

GGTTGTATGTCGGTTTTCGCTGCACCACTTCATTATTTCTTCTGGTTTT  
TTGGCGAGTATGTTTCCGAAGGCAGTGAGACGCGCCGTCACGGCAGG  
GGTGTGTTGCCGCGCCCACTGATGTCGTTCTTGCGATGTGGCGCTA  
TGGCATCGGATCCCCCTCTTGTGCAATCAAGTTGTCACCTGCCAG  
ATAAAAAATCGACAGCCGCGGTCATTCTCACACCGACGGAGAACCACT  
TCACTCTCAAGTGCCCTAAAACAGCGCTCACAGAGCCTCCCACTCTTG  
CGTACTCACCCAACAGGCAAATCTGCCAGCGGGTACTACAAGTAGCT  
GTACATCAAAGGCTGTAACATTGAGCTCCTTGATTCCTGAAGCAGAAG

ATAGCTGGTGGACGGGGGATTCTGCTAGTCTCGACACGGCAGGCATC  
AAACTCACAGTTCCAATCGAGAAGTTCCCCGTGACAACGCAGACGTTT  
GTGGTCGGTTGCATCAAGGGAGACGACGCACAGAGTTGTATGGTCACA  
GTGACAGTACAAGCCAGAGCCTCATCGGTTCGTCATAATAATGTCGCAAGG  
TGCTCCTACGGTGCAAACAGCACTCTTGGTCCTGTCAAGTTGTCTGCG  
GAAGGACCCACTACAATGACCCTCGTGTGCGGGAAAGATGGAGTCAAA  
GTTCCCTCAAGACAACAATCAGTACTGTTCCGGGACGACGCTGACTGGT  
TGCAACGAGAAATCGTTCAAAGATATTTTGCCAAAATTAAGTGAGAACC  
CGTGGCAGGGTAACGCTTCGAGTGATAATGGTGCCACGCTAACGATCA  
ACAAGGAAGCATTTCAGCCGAGTCAAAAAGCGTCATTATTGGATGCA  
CAGGGGGATCGCCTGAGAAGCATCACTGTACCGTGCAACTGGAGTTT  
GCCGGGGCTGCAGGGTCAGCAAAATCGTCTGCGGGAACAGCCAGTCA  
CGTTTCCATTTTCGCCATGGTGACCGGACTTATTGGCTCTATCGCAGC  
TTGTGTCGCGTGAGTGATCACCGTTGTGCTCACTTCTCAAATCGACAA  
AGGAAACAC

>TgCatJpGi1/TaJ

TGTCGGTTTTCGCTGCACCACTTCATTATTTCTTCTGGTTTTTTTGGCGA  
GTATGTTTCCGAAGGCAGTGAGACGCGCCGTCACGGCAGGGGTGTTT  
GCCGCGCCCACTGATGTCGTTCTTGCGATGTGGCGCTATGGCATC  
GGATCCCCCTCTTGTTGCCAATCAAGTTGTCACCTGCCCAGATAAAAA  
ATCGACAGCCGCGGTCATTCTCACACCGACGGAGAACCACTTCACTCT  
CAAGTGCCCTAAAACAGCGCTCACAGAGCCTCCCACTCTTGCGTACTC  
ACCCAACAGGCAAATCTGCCCAGCGGGTACTACAAGTAGCTGTACATCA  
AAGGCTGTAACATTGAGCTCCTTGATTCCTGAAGCAGAAGATAGCTGG  
TGGACGGGGGATTCTGCTAGTCTCGACACGGCAGGCATCAAACCTACA  
GTTCCAATCGAGAAGTTCCCCGTGACAACGCAGACGTTTGTGGTCGGT  
TGCATCAAGGGAGACGACGCACAGAGTTGTATGGTCACAGTGACAGTA  
CAAGCCAGAGCCTCATCGGTTCGTCATAATAATGTCGCAAGGTGCTCCTAC  
GGTGCAAACAGCACTCTTGGTCCTGTCAAGTTGTCTGCGGAAGGACC  
CACTACAATGACCCTCGTGTGCGGGAAAGATGGAGTCAAAGTTCCTCA  
AGACAACAATCAGTACTGTTCCGGGACGACGCTGACTGGTTGCAACGA  
GAAATCGTTCAAAGATATTTTGCCAAAATTAAGTGAGAACCCGTGGCA  
GGGTAACGCTTCGAGTGATAATGGTGCCACGCTAACGATCAACAAGGA  
AGCATTTCAGCCGAGTCAAAAAGCGTCATTATTGGATGCACAGGGGG  
ATCGCCTGAGAAGCATCACTGTACCGTGCAACTGGAGTTTGCCGGGG



CTGCAGGGTCAGCAAATCGTCTGCGGGAACAGCCAGTCACGTTTCCA  
TTTTCGCCATGGTGACCGGACTTATTGGCTCTATCGCAGCTTGTGTGCG  
CGTGA

>TgGoatJpOk1

TGTCGGTTTTCGCTGCACCACTTCATTATTTCTTCTGGTTTTTTTGACGA  
GTATGTTTCCGAAGGCAGTGAGACGCGCCGTCACGGCAGGGGTGTTT  
GCCGCGCCACACTGATGTCGTTCTTGCGATGTGGCGTTATGGCATC  
GGATCCCCCTCTTGTTGCCAATCAAGTTGTCACCTGCCCAGATAAAAA  
ATCGACAGCCGCGGTCATTCTCACACCGACGGAGAACCACTTCACTCT  
CAAGTGCCCTAAAACAGCGCTCACAGAGCCTCCCACTCTTGCGTACTC  
ACCCAACAGGCAAATCTGCCCAGCGGGTACTACAAGTAGCTGTACATCA  
AAGGCTGTAACATTGAGCTCCTTGATTCCTGAAGCAGAAGATAGCTGG  
TGGACGGGGGATTCTGCTAGTCTCGACACGGCAGGCATCAAACCTCACA  
GTTCCAATCGAGAAGTTCCCCGTGACAACGCAGACGTTTGTGGTCCGGT  
TGCATCAAGGGAGACGACGCACAGAGTTGTATGGTCACAGTGACAGTA  
CAAGCCAGAGCCTCATCGGTCGTCAATAATGTCGCAAGGTGCTCCTAC  
GGTGCAGACAGCACTCTTGGTCCTGTCAAGTTGTCTGCGGAAGGACC  
CACTACAATGACCCTTCGTGTGCGGGAAAGATGGAGTCAAAGTTCCTC  
AAGACAACAATCAGTACTGTTCCGGGACGACGCTGACTGGTTGCAACG  
AGAAATCGTTCAAAGATATTTTGCCAAAATTAAGTGAAGAACCCGTGGCA  
GGGTAACGCTTCGAGTGATAAGGGTGCCACGCTAACGATCAAGAAGGA  
AGCATTTCAGCCGAGTCAAAAAGCGTCATTATTGGATGCACAGGGGG  
ATCGCCTGAGAAGCATCACTGTACCGTGAAACTGGAGTTTGCCGGGGC  
TGCAGGGTCAGCAAATCGGCTGCGGGAACAGCCAGTCACGTTTCCAT  
TTTTGCCATGGTGATCGGACTTATTGGCTCTATCGCAGCTTGTGTGCG  
GTGA

>TgGoatJpOk2

CGTGTAACACACGGTTGTATGTCGGTTTTCGCTGCACCACTTCATTAT  
TTCTTCTGGTTTTTTTGACGAGTATGTTTCCGAAGGCAGTGAGACGCGC  
CGTCACGGCAGGGGTGTTTGCCGCGCCACACTGATGTCGTTCTTGC  
GATGTGGCGTTATGGCATCGGATCCCCCTCTTGTTGCCAATCAAGTTG  
TCACCTGCCCAGATAAAAAATCGACAGCCGCGGTCATTCTCACACCGA  
CGGAGAACCACTTCACTCTCAAGTGCCCTAAAACAGCGCTCACAGAGC  
CTCCCACTCTTGCGTACTACCCAACAGGCAAATCTGCCCAGCGGGTA

CTACAAGTAGCTGTACATCAAAGGCTGTAACATTGAGCTCCTTGATTCC  
TGAAGCAGAAGATAGCTGGTGGACGGGGGATTCTGCTAGTCTCGACAC  
GGCAGGCATCAAACCTCACAGTTCCAATCGAGAAGTTCCCCGTGACAAC  
GCAGACGTTTGTGGTTCGGTTGCATCAAGGGAGACGACGCACAGAGTT  
GTATGGTCACAGTGACAGTACAAGCCAGAGCCTCATCGGTTCGTCAATA  
ATGTCGCAAGGTGCTCCTACGGTGCAGACAGCACTCTTGGTTCCTGTCA  
AGTTGTCTGCGGAAGGACCCACTACAATGACCCTCGTGTGCGGGAAAG  
ATGGAGTCAAAGTTCCTCAAGACAACAATCAGTACTGTTCCGGGACGA  
CGCTGACTGGTTGCAACGAGAAATCGTTCAAAGATATTTTGCCAAAAT  
TAACTGAGAACCCGTGGCAGGGTAACGCTTCGAGTGATAAGGGTGCCA  
CGCTAACGATCAAGAAGGAAGCATTTCAGCCGAGTCAAAAAGCGTCA  
TTATTGGATGCACAGGGGGATCGCCTGAGAAGCATCACTGTACCGTGA  
AACTGGAGTTTGCCGGGGCTGCAGGGTCAGCAAATCGGCTGCGGGA  
ACAGCCAGTCACGTTTCCATTTTTGCCATGGTGATCGGACTTATTGGC  
TCTATCGCAGCTTGTGTGCGGTGAGTGATCACCGTTGTGCTCACTTCT  
CAAATC

>TgGoatJpOk3

TTCACATGTGTCATTGTTCGTGTAACACACGGTTGTATGTTCGGTTTCG  
CTGCACCACTTCATTATTTCTTCTGGTTTTTTGGCGAGTATGTTTCCG  
AAGGCAGTGAGACGCGCCGTCACGGCAGGGGTGTTTGCCGCGCCCAC  
ACTGATGTCGTTCTTGCGATGTGGCGCTATGGCATCGGATCCCCCTCT  
TGTTGCCAATCAAGTTGTCACCTGCCAGATAAAAAATCGACAGCCGC  
GGTCATTCTCACACCGACGGAGAACCACTTCACTCTCAAGTGCCCTAA  
AACAGCGCTCACAGAGCCTCCCCTCTTGCCTACTCACCCAACAGGCA  
AATCTGCCCAGCGGGTACTACAAGTAGCTGTACATCAAAGGCTGTAAC  
ATTGAGCTCCTTGATTCTGAAGCAGAAGATAGCTGGTGGACGGGGG  
ATTCTGCTAGTCTCGACACGGCAGGCATCAAACCTCACAGTTCCAATCG  
AGAAGTTCCCCGTGACAACGCAGACGTTTGTGGTTCGGTTGCATCAAGG  
GAGACGACGCACAGAGTTGTATGGTCACAGTGACAGTACAAGCCAGAG  
CCTCATCGGTTCGTCAATAATGTCGCAAGGTGCTCCTACGGTGCAGACA  
GCACTCTTGGTTCCTGTCAAGTTGTCTGCGGAAGGACCCACTACAATGA  
CCCTCGTGTGCGGGAAAGATGGAGTCAAAGTTCCTCAAGACAACAATC  
AGTACTGTTCCGGGACGACGCTGACTGGTTGCAACGAGAAATCGTTCA  
AAGATATTTTGCCAAAATTAAGTGAAGAACCCGTGGCAGGGTAACGCTT  
CGAGTGATAAGGGTGCCACGCTAACGATCAAGAAGGAAGCATTTCAG

CCGAGTCAAAAAGCGTCATTATTGGATGCACAGGGGGATCGCCTGAGA  
AGCATCACTGTACCGTGAAACTGGAGTTTGCCGGGGCTGCAGGGTCA  
GCAAATCGGCTGCGGGAACAGCCAGTCACGTTTCCATTTTTGCCATG  
GTGATCGGACTTATTGGCTCTATCGCAGCTTGTGTGCGGTGAGTGATC  
ACCGTTGTGCTCACTTCTCAAATCNACAAAGGGAAACACA

>TgGoatJpOk4

TGTCGGTTTTCGCTGCACCACTTCATTATTTCTTCTGGTTTTTTTGACGA  
GTATGTTTTCCGAAGGCAGTGAGACGCGCCGTCACGGCAGGGGTGTTT  
GCCGCGCCACACTGATGTCGTTCTTGCGATGTGGCGTTATGGCATC  
GGATCCCCCTCTTGTTGCCAATCAAGTTGTCACCTGCCCAGATAAAAA  
ATCGACAGCCGCGGTCANTCTCACACCGACGGAGAACCACTTCACTCT  
CAAGTGCCCTAAAACAGCGCTCACAGAGCCTCCCATTCTTGCGTACTC  
ACCCAACAGGCAAATCTGCCCAGCGGGTACTACAAGTAGCTGTACATCA  
AAGGCTGTAACATTGAGCTCCTTGATTCCTGAAGCAGAAGATAGCTGG  
TGGACGGGGGATTCTGCTAGTCTCGACACGGCAGGCATCAAACCTCACA  
GTTCCAATCGAGAAGTTCCCCGTGACAACGCAGACGTTTGTGGTCCGGT  
TGCATCAAGGGAGACGACGCACAGAGTTGTATGGTCACAGTGACAGTA  
CAAGCCAGAGCCTCATCGGTCGTCAATAATGTCGCAAGGTGCTCCTAC  
GGTGCAGACAGCACTCTTGGTCCTGTCAAGTTGTCTGCGGAAGGACC  
CACTACAATGACCCTCGTGTGCGGGAAAGATGGAGTCAAAGTTCCTCA  
AGACAACAATCAGTACTGTTCCGGGACGACGCTGACTGGTTGCAACGA  
GAAATCGTTCAAAGATATTTTGCCAAAATTAAGTGAAGCCCGTGGCA  
GGGTAACGCTTCGAGTGATAAGGGTGCCACGCTAACGATCAAGAAGGA  
AGCATTTCCAGCCGAGTCAAAAAGCGTCATTATTGGATGCACAGGGGG  
ATCGCCTGAGAAGCATCACTGTACCGTGAAACTGGAGTTTGCCGGGGC  
TGCAGGGTCAGCAAATCGGCTGCGGGAACAGCCAGTCACGTTTCCAT  
TTTTGCCATGGTGATCGGACTTATTGGCTCTATCGCAGCTTGTGTGCG  
GTGA

>TgGoatJpOk5

TGTCGGTTTTCGCTGCACCACTTCATTATTTCTTCTGGTTTTTTTGACGA  
GTATGTTTTCCGAAGGCAGTGAGACGCGCCGTCACGGCAGGGGTGTTT  
GCCGCGCCACACTGATGTCGTTCTTGCGATGTGGCGTTATGGCATC  
GGATCCCCCTCTTGTTGCCAATCAAGTTGTCACCTGCCCAGATAAAAA  
ATCGACAGCCGCGGTCATTCTCACACCGACGGAGAACCACTTCACTCT

CAAGTGCCCTAAAACAGCGCTCACAGAGCCTCCCATTCTTGCGTACTC  
ACCCAACAGGCAAATCTGCCAGCGGGTACTACAAGTAGCTGTACATCA  
AAGGCTGTAACATTGAGCTCCTTGATTCCTGAAGCAGAAGATAGCTGG  
TGGACGGGGGATTCTGCTAGTCTCGACACGGCAGGCATCAAACCTCACA  
GTTCCAATCGAGAAGTTCCCCGTGACAACGCAGACGTTTGTGGTCCGGT  
TGCATCAAGGGAGACGACGCACAGAGTTGTATGGTCACAGTGACAGTA  
CAAGCCAGAGCCTCATCGGTCGTCAATAATGTCGCAAGGTGCTCCTAC  
GGTGCAGACAGCACTCTTGGTCCTGTCAAGTTGTCTGCGGAAGGACC  
CACTACAATGACCCTTCGTGTGGCGGGAAAGATGGAGTCAAAGTTCCT  
CAAGACAACAATCAGTACTGTTCCGGGACGACGCTGACTGGTTGCAAC  
GAGAAATCGTTCAAAGATATTTTGCCAAAATTAAGTGAAGAACCCGTGG  
CAGGGTAACGCTTCGAGTGATAAGGGTGCCACGCTAACGATCAAGAAG  
GAAGCATTTCAGCCGAGTCAAAAAGCGTCATTATTGGATGCACAGGG  
GGATCGCCTGAGAAGCATCACTGTACCGTGAAACTGGAGTTTGCCGG  
GGCTGCAGGGTCAGCAAATCGGCTGCGGGAACAGCCAGTCACGTTT  
CCATTTTTGCCATGGTGATCGGACTTATTGGCTCTANCGCAGCTTGTG  
TCGCGTGA

>TgGoatJpOk6

TTCACATGTGTCATTGTTCGTGTAACACACGGTTGTATGTCGGTTTTCG  
CTGCACCACTTCATTATTTCTTCTGGTTTTTTGGCGAGTATGTTTCCG  
AAGGCAGTGAGACGCGCCGTACGGCAGGGGTGTTTGCCGCGCCCAC  
ACTGATGTCGTTCTTGCGATGTGGCGCTATGGCATCGGATCCCCCTCT  
TGTTGCCAATCAAGTTGTACCTGCCAGATAAAAAATCGACAGCCGC  
GGTCATTCTCACACCGACGGAGAACCACTTCACTCTCAAGTGCCCTAA  
AACAGCGCTCACAGAGCCTCCCCTCTTGGTACTCACCCAACAGGCA  
AATCTGCCAGCGGGTACTACAAGTAGCTGTACATCAAAGGCTGTAAC  
ATTGAGCTCCTTGATTCCTGAAGCAGAAGATAGCTGGTGGACGGGGG  
ATTCTGCTAGTCTCGACACGGCAGGCATCAAACCTCACAGTTCCAATCG  
AGAAGTTCCCCGTGACAACGCAGACGTTTGTGGTCCGGTTGCATCAAGG  
GAGACGACGCACAGAGTTGTATGGTCACAGTGACAGTACAAGCCAGAG  
CCTCATCGGTCGTCAATAATGTCGCAAGGTGCTCCTACGGTGCAAACA  
GCACTCTTGGTCCTGTCAAGTTGTCTGCGGAAGGACCCACTACAATGA  
CCCTCGTGTGCGGGAAAGATGGAGTCAAAGTTCCTCAAGACAACAATC  
AGTACTGTTCCGGGACGACGCTGACTGGTTGCAACGAGAAATCGTTCA  
AAGATATTTTGCCAAAATTAAGTGAAGAACCCGTGGCAGGGTAACGCTT

CGAGTGATAATGGTGCCACGCTAACGATCAACAAGGAAGCATTTCAG  
CCGAGTCAAAAAGCGTCATTATTGGATGCACAGGGGGATCGCCTGAGA  
AGCATCACTGTACCGTGCAACTGGAGTTTGCCGGGGCTGCAGGGTCA  
GCAAATCGTCTGCGGGAACAGCCAGTCACGTTTCCATTTTCGCCATG  
GTGACCGGACTTATTGGCTCTATCGCAGCTTGTGTCGCGTGAGTGATC  
ACCGTTGTGCTCACTTCTCAAATCGACA

>TgGoatJpOk7

ACATGTGtCATTGTCGTGTAAACACACGGTTGTATGTCGGTTTCGCTG  
CACCCTTCATTATTTCTTCTGGTTTTTTGGCGAGTATGTTTCCGAAG  
GCAGTGAGACGCGCCGTCACGGCAGGGGTGTTTGCCGCGCCCACACT  
GATGTCGTTCTTGCGATGTGGCGCTATGGCATCGGATCCCCCTCTTG  
TTGCCAATCAAGTTGTCACCTGCCAGATAAAAAATCGACAGCCGCGG  
TCATTCTCACACCGACGGAGAACCACTTCACTCTCAAGTGCCCTAAAAC  
AGCGCTCACAGAGCCTCCCCTCTTGCGTACTCACCCAACAGGCAAAT  
CTGCCCAGCGGGTACTACAAGTAGCTGTACATCAAAGGCTGTAACATT  
GAGCTCCTTGATTCTGAAGCAGAAGATAGCTGGTGGACGGGGGATT  
CTGCTAGTCTCGACACGGCAGGCATCAAACCTCACAGTTCCAATCGAGA  
AGTTCCCCGTGACAACGCAGACGTTTGTGGTCGGTTGCATCAAGGGA  
GACGACGCACAGAGTTGTATGGTCACAGTGACAGTACAAGCCAGAGCC  
TCATCGGTCGTCAATAATGTCGCAAGGTGCTCCTACGGTGCAAACAGC  
ACTCTTGGTCTGTCAAGTTGTCTGCGGAAGGACCCACTACAATGACC  
CTCGTGTGCGGGAAAGATGGAGTCAAAGTTCCTCAAGACAACAATCAG  
TACTGTTCCGGGACGACGCTGACTGGTTGCAACGAGAAATCGTTCAA  
GATATTTTGCCAAAATTAAGTGAGAACCCGTGGCAGGGTAACGCTTCG  
AGTGATAATGGTGCCACGCTAACGATCAACAAGGAAGCATTTCAGCC  
GAGTCAAAAAGCGTCATTATTGGATGCACAGGGGGATCGCCTGAGAAG  
CATCACTGTACCGTGCAACTGGAGTTTGCCGGGGCTGCAGGGTCAAGC  
AAAATCGTCTGCGGGAACAGCCAGTCACGTTTCCATTTTCGCCATGGT  
GACCGGACTTATTGGCTCTATCGCAGCTTGTGTCGCGTGAGTGATCAC  
CGTTGTGCTCACTTCTCAAATCGACAAAGGAAACAC

>TgGoatJpOk8

GTGTAAACACACGGTTGTATGTCGGTTTCGCTGCACCACTTCATTATT  
TCTTCTGGTTTTTTGGCGAGTATGTTTCCGAAGGCAGTGAGACGCGC  
CGTCACGGCAGGGGTGTTTGCCGCGCCCACACTGATGTCGTTCTTGC

GATGTGGCGCTATGGCATCGGATCCCCCTCTTGTTGCCAATCAAGTTG  
TCACCTGCCCAGATAAAAAATCGACAGCCGCGGTCATTCTCACACCGA  
CGGAGAACCACTTCACTCTCAAGTGCCCTAAAACAGCGCTCACAGAGC  
CTCCCCTCTTGCGTACTCACCCAACAGGCAAATCTGCCCAGCGGGTA  
CTACAAGTAGCTGTACATCAAAGGCTGTAACATTGAGCTCCTTGATTCC  
TGAAGCAGAAGATAGCTGGTGGACGGGGGATTCTGCTAGTCTCGACAC  
GGCAGGCATCAAACCTCACAGTTCCAATCGAGAAGTTCCCCGTGACAAC  
GCAGACGTTTGTGGTTCGGTTGCATCAAGGGAGACGACGCACAGAGTT  
GTATGGTCACAGTGACAGTACAAGCCAGAGCCTCATCGGTTCGTCAATA  
ATGTCGCAAGGTGCTCCTACGGTGCAAACAGCACTCTTGGTCCTGTCA  
AGTTGTCTGCGGAAGGACCCACTACAATGACCCTCGTGTGCGGGAAAG  
ATGGAGTCAAAGTTCCCTCAAGACAACAATCAGTACTGTTCCGGGACGA  
CGCTGACTGGTTGCAACGAGAAATCGTTCAAAGATATTTTGCCAAAAT  
TAAGTGAGAACCCGTGGCAGGGTAACGCTTCGAGTGATAATGGTGCCA  
CGCTAACGATCAACAAGGAAGCATTTCAGCCGAGTCAAAAAGCGTCA  
TTATTGGATGCACAGGGGGATCGCCTGAGAAGCATCACTGTACCGTGC  
AACTGGAGTTTGCCGGGGCTGCAGGGTCAGCAAATCGTCTGCGGGA  
ACAGCCAGTCACGTTTCCATTTTCGCCATGGTGACCGGACTTATTGGC  
TCTATCGCAGCTTGTGTGCGGTGAGTGATCACCGTTGTGCTCACTTCT  
CAAAT

>TgGoatJpOk9

TTCACATGTGTCATTGTTCGTGTAACACACGGTTGTATGTTCGGTTTCG  
CTGCACCACTTCATTATTTCTTCTGGTTTTTTGGCGAGTATGTTTCCG  
AAGGCAGTGAGACGCGCCGTCACGGCAGGGGTGTTTGCCGCGCCCAC  
ACTGATGTCGTTCTTGCGATGTGGCGCTATGGCATCGGATCCCCCTCT  
TGTTGCCAATCAAGTTGTCACCTGCCCAGATAAAAAATCGACAGCCGC  
GGTCATTCTCACACCGACGGAGAACCACTTCACTCTCAAGTGCCCTAA  
AACAGCGCTCACAGAGCCTCCCCTCTTGCGTACTCACCCAACAGGCA  
AATCTGCCCAGCGGGTACTACAAGTAGCTGTACATCAAAGGCTGTAAC  
ATTGAGCTCCTTGATTCTGAAGCAGAAGATAGCTGGTGGACGGGGG  
ATTCTGCTAGTCTCGACACGGCAGGCATCAAACCTCACAGTTCCAATCG  
AGAAGTTCCCCGTGACAACGCAGACGTTTGTGGTTCGGTTGCATCAAGG  
GAGACGACGCACAGAGTTGTATGGTCACAGTGACAGTACAAGCCAGAG  
CCTCATCGGTTCGTCAATAATGTCGCAAGGTGCTCCTACGGTGCAAACA  
GCACTCTTGGTCCTGTCAAGTTGTCTGCGGAAGGACCCACTACAATGA

CCCTCGTGTGCGGGAAAGATGGAGTCAAAGTTCCTCAAGACAACAATC  
AGTACTGTTCCGGGACGACGCTGACTGGTTGCAACGAGAAATCGTTCA  
AAGATATTTTGCCAAAATTAAGTGAGAACCCGTGGCAGGGTAACGCTT  
CGAGTGATAATGGTGCCACGCTAACGATCAACAAGGAAGCATTTCAG  
CCGAGTCAAAAAGCGTCATTATTGGATGCACAGGGGGATCGCCTGAGA  
AGCATCACTGTACCGTGCAACTGGAGTTTGCCGGGGCTGCAGGGTCA  
GCAAATCGTCTGCGGGAACAGCCAGTCACGTTTCCATTTTCGCCATG  
GTGACCGGACTTATTGGCTCTATCGCAGCTTGTGTGCGCGTGAGTGATC  
ACCGTTGTGCTCACTTCTCAAATCGACAAAGGAAACAC

>TgGoatJpOk10

TCGTGTAAACACACGGTTGTATGTCGGTTTCGCTGCACCACTTCATTA  
TTTCTTCTGGTTTTTTGGCGAGTATGTTTCCGAAGGCAGTGAGACGC  
GCCGTACGGCAGGGGTGTTTGCCGCGCCACACTGATGTCGTTCTT  
GCGATGTGGCGCTATGGCATCGGATCCCCCTCTTGTTGCCAATCAAGT  
TGTCACCTGCCAGATAAAAAATCGACAGCCGCGGTCATTCTCACACC  
GACGGAGAACCACTTCACTCTCAAGTGCCCTAAAACAGCGCTCACAGA  
GCCTCCCCTCTTGCGTACTCACCAACAGGCAAATCTGCCAGCGGG  
TACTACAAGTAGCTGTACATCAAAGGCTGTAACATTGAGCTCCTTGATT  
CCTGAAGCAGAAGATAGCTGGTGGACGGGGGATTCTGCTAGTCTCGA  
CACGGCAGGCATCAAACCTCACAGTTCCAATCGAGAAGTTCCCCGTGAC  
AACGCAGACGTTTTGTGGTTCGGTTGCATCAAGGGAGACGACGCACAGA  
GTTGTATGGTCACAGTGACAGTACAAGCCAGAGCCTCATCGGTCGTCA  
ATAATGTCGCAAGGTGCTCCTACGGTGCAAACAGCACTCTTGGTCCTG  
TCAAGTTGTCTGCGGAAGGACCCACTACAATGACCCTCGTGTGCGGGA  
AAGATGGAGTCAAAGTTCCTCAAGACAACAATCAGTACTGTTCCGGGA  
CGACGCTGACTGGTTGCAACGAGAAATCGTTCAAAGATATTTTGCCAA  
AATTAAGTGAGAACCCGTGGCAGGGTAACGCTTCGAGTGATAATGGTG  
CCACGCTAACGATCAACAAGGAAGCATTTCAGCCGAGTCAAAAAGCG  
TCATTATTGGATGCACAGGGGGATCGCCTGAGAAGCATCACTGTACCG  
TGCAACTGGAGTTTGCCGGGGCTGCAGGGTCAGCAAATCGTCTGCG  
GGAACAGCCAGTCACGTTTCCATTTTCGCCATGGTGACCGGACTTATT  
GGCTCTATCGCAGCTTGTGTGCGCGTGAGTGATCACCGTTGTGCTCACT  
TCTCAA

>TgGoatJpOk11

GTCGTGTAACACACGGTTGTATGTTCGGTTTCGCTGCACCACTTCATT  
ATTTCTTCTGGTTTTTTGGCGAGTATGTTTCCGAAGGCAGTGAGACGC  
GCCGTCACGGCAGGGGTGTTTGCCGCGCCACACTGATGTCGTTCTT  
GCGATGTGGCGCTATGGCATCGGATCCCCCTCTTGTTGCCAATCAAGT  
TGTCACCTGCCCAGATAAAAAATCGACAGCCGCGGTCATTCTCACACC  
GACGGAGAACCACTTCACTCTCAAGTGCCCTAAAACAGCGCTCACAGA  
GCCTCCCCTCTTGCGTACTCACCAACAGGCAAATCTGCCCAGCGGG  
TACTACAAGTAGCTGTACATCAAAGGCTGTAACATTGAGCTCCTTGATT  
CCTGAAGCAGAAGATAGCTGGTGGACGGGGGATTCTGCTAGTCTCGA  
CACGGCAGGCATCAAACCTCACAGTTCCAATCGAGAAGTTCCCCGTGAC  
AACGCAGACGTTTTGTGGTTCGGTTGCATCAAGGGAGACGACGCACAGA  
GTTGTATGGTCACAGTGACAGTACAAGCCAGAGCCTCATCGGTCGTCA  
ATAATGTCGCAAGGTGCTCCTACGGTGCAAACAGCACTCTTGGTCCTG  
TCAAGTTGTCTGCGGAAGGACCCACTACAATGACCCTCGTGTGCGGGA  
AAGATGGAGTCAAAGTTCCTCAAGACAACAATCAGTACTGTTCCGGGA  
CGACGCTGACTGGTTGCAACGAGAAATCGTTCAAAGATATTTTGCCAA  
AATTAAGTGAGAACCCGTGGCAGGGTAACGCTTCGAGTGATAATGGTG  
CCACGCTAACGATCAACAAGGAAGCATTTCAGCCGAGTCAAAAAGCG  
TCATTATTGGATGCACAGGGGGATCGCCTGAGAAGCATCACTGTACCG  
TGCAACTGGAGTTTGCCGGGGCTGCAGGGTCAGCAAATCGTCTGCG  
GGAACAGCCAGTCACGTTTCCATTTTCGCCATGGTGACCGGACTTATT  
GGCTCTATCGCAGCTTGTGTGCGGTGAGTGATCACCGTTGTGCTCACT  
TCTCAAATCGACAAA



Hypothetical protein intron 2 (HP2)

>GT1

CCCTTCCTGTTTGTCTTCTGCAGGTACGACCAGAAAGGCGTAGTGTACT  
CCAATAAAATCCAGAAAGGCAGGGCAACGTGTCTGCACGCCACGAACC  
ACGCAGCTTCCTCAACCGCCTGCTGAGCACGCAACCCTGGACCCCCTT  
CAGGCGATAGCGGAATGAGCAATTGTGCACCTGGGGCAGAAACAGTTC  
TTACAGGCAAGGGAACCGGACAAAGCAGGCAAGAGACTGAGGTGAGAA  
AACAGTGACACAAGAACTCAGCGGATCTCGTATTCATTGAACCTAGAAG  
CTGCTCGTTGACCCACGTTTTCCGACCGAAGGCACCGGCCCTCTGCTC  
ATCTAGCGACAACCTGTTGAAGGCTATGGTGTACAATCGTTCGCAACCA  
TAAAAAACAGTTCGGACGGGCTTGAGCCTATCCCCCTCGAGGTAGAAA  
GGCGACACTCTCTTCCAACCTGACGAATGGATCCAAA

>ME49

GACAGAAACACGCAGAGAATATGTCACCGATTACACACCCGGAAATGC  
GAAAAAATGAGCAGAACACGATGAGCACAAGAAGAGCAAACGAAACTAA  
CCGGAAACAGGAAACAGTTGACTCTCCCCTTCCGCGCTAGGCACGCAC  
CCCGTGAGTTAACAAAGATGGAAAGATTGATGAAACAGAAAGAATGAT  
GTGGCGTGAGCCCGCAAAGTGACTATAACACGAACCGTAAAGACTCG  
GCAAAAAGTGAAGGCAAACGAGGCACACCACAACCAGCGAAGCTGCAG  
GAATAATACAGTCAGTTCCCTCGATCGCAGCACTCGAATACAGCTGCC  
GAAAAGCATACTGCCCTTCCTGTTTGTCTTCTGCAGGTACGACCAGAAA  
GGCGTAGTGTACTCCAATAAAATCCAGAAAGGCAGGGCAACGTGTCTG  
CACGCCACGAACCACGCAGCTTCCTCAACCGCCTGCTGAGCACGCAAC  
CCTGGACCCCCTTCAGGCGATAGCGGAATGAGCAATTGTGCACCTGG  
GGCAGAAACAGTTCTTACAGGCAAGGGAACCGGACAAAGCAGGCAAGA  
GACTGAGGTGAGAAAACAGTGACACAAGAACTCAGCGGATCTCGTATT  
CATTGAACCTAGAAGCTGCTCGTTGACCCACGTTTTCCGACCGAAGGC  
ACCGGCCCTCTGCTCATCTAGCGACAACCTGTTGAAGGCTATGGTGTAC  
AATCGTTCGCAACCATAAAAAACAGTTCGGACGGGCTTGAGCCTATCC  
CCCTCGAGGTAGAAAGGCGACACTCTCTTCCAACCTGACGAATGGATCC  
AAAACGCAGCAAGCATGGGAACAAAGATTA

>VEG

CCCTTCCTGTTTGTCTTCTGCAGGTACGACCAGAAAGGCGTAGTGTACT

CCAATAAAGTCCAGAAAGGCAGGGCAACGTGTCTGCACGCCACGAACC  
ACGCAGCTTCCTCAACCGCCTGCTGAGCACGCAACCCTGGACCCCCTT  
CAGGCGATAGCGGAATGAGCAATTGTGCACCTGGGGTATAAACAGTTC  
TTACAGGCAAGGGAACCGGACAAAGCAGGCAAGAGACTGAGGTGAGAA  
AACAGTGACACAAGAACTCAGCGGATCTCATATTCATTGAACCTAGAAG  
CTGCTCGTTGACCCACGTTTTCCGACCGAAGGCACCGGCCCTCTGCTC  
ATCTAGCGACAACCTGTTGAAGGCTATGGTGTACAATCGTTCGCAACCA  
TAAAAAACAGTTCGGACGGGCTTGAGCCTATCCCCCTCGAGGTAGAAA  
GGCGACACTCTCTTCCAACCTGACGAATGGATCCAAA

>MAS

CCCTTCCTGTTTGTCTTCTGCAGGTACGACCAGAAAGGCGTAGTGTACT  
CCAACAAAATCCAGAAAGGCGGGGCAACGTGTCTGCACGCTACGAACC  
ACGCAGCTTCCTCAACCGCCTGCTGAGCACGCAACCCTGGACCCCCTT  
CAGGCGATAGCGGAATGAGCAATTGTGCACCTGGGGCATAAACAGTTC  
TTACAGGCAAGGGAACCGGACAAAGCAGGCAAGAGACTGAGGTGAGAA  
AACAGTGACACAAGAACTCAGCGGATCTCATATTCATTGAACCTAGAAG  
CTGCTCGTTGACCCACGTTTTCCGACCGAAGGCACCGGCCCTCTGCTC  
ATCTAGCGACAACCTGTTGAAGGCTATGGTGTACAATCGTTCGCAACCA  
TAAAAAACAGTTCGGACGGGCTTGAGCCTATCCCCCTCCAGGTAGAAA  
GGCGACACTCTCTTCCAACCTGACGAATGGATCCAAAG

>RUB

CCCTTCCTGTTTGTCTTCTGCAGGTACGACCAGAAAGGCGTAGTGTACT  
CCAATAAAATCCAGAAAGGCAGGGCAACGTGTCTGCACGCCACGAACC  
ACGCAGCTTCCTCAACCGCCTGCTGAGCACGCAACCCTGGACCCCCTT  
CAGGCGATAGCGGAATGAGCAATTGTGCACCTGGGGTATAAACAGTTC  
TTACAGGCAAGGGAACCGGACAAAGCAGGCAAGAGACTGAGGTGAGAA  
AACAGTGACACAAGAACTCAGCGGATCTCATATTCATTGAACCTAGAAG  
CTGCTCGTTGACCCACGTTTTCCGACCGAAGGCACCGGCCCTCTGCTC  
ATCTAGCGACAACCTGTTGAAGGCTATGGTGTACAATCGTTCGCAACCA  
TAAAAAACAGTTCGGACGGGCTTGAGCCTATCCCCCTCGAGGTAGAA  
GGCGACACTCTCTTCCAACCTGACGAATGGATCCAAA

>FOU

CCCTTCCTGTTTGTCTTCTGCAGGTACGACCAGAAAGGCGTAGTGTACT

CCAATAAAATCCAGAAAGGCAGGGCAACGTGTCTGCACGCCACGAACC  
ACGCAGCTTCCTCAACCGCCTGCTGAGCACGCAACCCTGGACCCCCTT  
CAGGCGATAGCGGAATGAGCAATTGTGCACCTGGGGTATAAACAGTTC  
TTACAGGCAAGGGAACCGGACAAAGCAGGCAAGAGACTGAGGTGAGAA  
AACAGTGACACAAGAACTCAGCGGATCTCATATTCATTGAACCTAGAAG  
CTGCTCGTTGACCCACGTTTTCCGACCGAAGGCACCGGCCCTCTGCTC  
ATCTAGCGACAACCTGTTGAAGGCTATGGTGTACAATCGTTCGCAACCA  
TAAAAAACAGTTCGGACGGGCTTGAGCCTATCCCCCTCGAGGTAGAAA  
GGCGACACTCTCTTCCAACCTGACGAATGGATCCAAA

>CAST

CCCTTCCTGTTTGTTTCTGCAGGTACGACCAGAAAGGCGTAGTGTACT  
CCAATAAAATCCAGAAAGGCAGGGCAACGTGTCTGCACGCCACGAACC  
ACGCAGCTTCCTCAACCGCCTGCTGAGCACGCAACCCTGGACCCCCTT  
CAGGCGATAGCGGAATGAGCAATTGTGCACCTGGGGTATAAACAGTTC  
TTACAGGCAAGGGAACCGGACAAAGCAGGCAAGAGACTGAGGTGAGAA  
AACAGTGACACAAGAACTCAGCGGATCTCATATTCATTGAACCTAGAAG  
CTGCTCGTTGACCCACGTTTTCCGACCGAAGGCACCGGCCCTCTGCTC  
ATCTAGCGACAACCTGTTGAAGGCTATGGTGTACAATCGTTCGCAACCA  
TAAAAAACAGTTCGGACGGGCTTGAGCCTATCCCCCTCGAGGTAGAAA  
GGCGACACTCTCTTCCAACCTGACGAATGGATCCAAA

>TgCatBr5

CCCTTCCTGTTTGTTTCTGCAGGTACGACCAGAAAGGCGTAGTGTACT  
CCAATAAAGTCCAGAAAGGCAGGGCAACGTGTCTGCACGCCACGAACC  
ACGCAGCTTCCTCAACCGCCTGCTGAGCACGCAACCCTGGACCCCCTT  
CAGGCGATAGCGGAATGAGCAATTGTGCACCTGGGGTATAAACAGTTC  
TTACAGGCAAGGGAACCGGACAAAGCAGGCAAGAGACTGAGGTGAGAA  
AACAGTGACACAAGAACTCAGCGGATCTCATATTCATTGAACCTAGAAG  
CTGCTCGTTGACCCACGTTTTCCGACCGAAGGCACCGGCCCTCTGCTC  
ATCTAGCGACAACCTGTTGAAGGCTATGGTGTACAATCGTTCGCAACCA  
TAAAAAACAGTTCGGACGGGCTTGAGCCTATCCCCCTCGAGGTAGAAA  
GGCGACACTCTCTTCCAACCTGACGAATGGATCCAAA

>p89

CCCTTCCTGTTTGTTTCTGCAGGTACGACCAGAAAGGCGTAGTGTACT

CCAATAAAGTCCAGAAAGGCAGGGCAACGTGTCTGCACGCCACGAACC  
ACGCAGCTTCCTCAACCGCCTGCTGAGCACGCAACCCTGGACCCCCTT  
CAGGCGATAGCGGAATGAGCAATTGTGCACCTGGGGTATAAACAGTTC  
TTACAGGCAAGGGAACCGGACAAAGCAGGCAAGAGACTGAGGTGAGAA  
AACAGTGACACAAGAACTCAGCGGATCTCATATTCATTGAACCTAGAAG  
CTGCTCGTTGACCCACGTTTTCCGACCGAAGGCACCGGCCCTCTGCTC  
ATCTAGCGACAACCTGTTGAAGGCTATGGTGTACAATCGTTCGCAACCA  
TAAAAAACAGTTCGGACGGGCTTGAGCCTATCCCCCTCGAGGTAGAAA  
GGCGACACTCTCTTCCAACCTGACGAATGGATCCAAA

>VAND

CCCTTCCTGTTTGTCTTCTGCAGGTACGACCAGAAAGGCGTAGTGTACT  
CCAATAAAGTCCAGAAAGGCAGGGCAACGTGTCTGCACGCCACGAACC  
ACGCAGCTTCCTCAACCGCCTGCTGAGCACGCAACCCTGGACCCCCTT  
CAGGCGATAGCGGAATGAGCAATTGTGCACCTGGGGTATAAACAGTTC  
TTACAGGCAAGGGAACCGGACAAAGCAGGCAAGAGACTGAGGTGAGAA  
AACAGTGACACAAGAACTCAGCGGATCTCATATTCATTGAACCTAGAAG  
CTGCTCGTTGACCCACGTTTTCCGACCGAAGGCACCGGCCCTCTGCTC  
ATCTAGCGACAACCTGTTGAAGGCTATGGTGTACAATCGTTCGCAACCA  
TAAAAAACAGTTCGGACGGGCTTGAGCCTATCCCCCTCGAGGTAGAAA  
GGCGACACTCTCTTCCAACCTGACGAATGGATCCAAA

>TgCgCa1

CCCTTCCTGTTTGTCTTCTGCAGGTACGACCAGAAAGGCGTAGTGTACT  
CCAATAAAATCCAGAAAGGCAGGGCAACGTGTCTGCACGCCACGAACC  
ACGCAGCTTCCTCAACCGCCTGCTGAGCACGCAACCCTGGACCCCCTT  
CAGGCGATAGCGGAATGAGCAATTGTGCACCTGGGGTATAAACAGTTC  
TTACAGGCAAGGGAACCGGACAAAGCAGGCAAGAGACTGAGGTGAGAA  
AACAGTGACACAAGAACTCAGCGGATCTCATATTCATTGAACCTAGAAG  
CTGCTCGTTGACCCACGTTTTCCGACCGAAGGCACCGGCCCTCTGCTC  
ATCTAGCGACAACCTGTTTAAGGCTATGGTGTACAATCGTTCGCAACCAT  
AAAAAACAGTTCGGACGGGCTTGAGCCTATCCCCCTCGAGGTAGAAAG  
GCGACACTCTCTTCCAACCTGACGAATGGATCCAAA

>ARI

CCCTTCCTGTTTGTCTTCTGCAGGTACGACCAGAAAGGCGTAGTGTACT

CCAATAAAATCCAGAAAGGCAGGGCAACGTGTCTGCACGCCACGAACC  
ACGCAGCTTCCTCAACCGCCTGCTGAGCACGCAACCCTGGACCCCCTT  
CAGGCGATAGCGGAATGAGCAATTGTGCACCTGGGGCAGAAACAGTTC  
TTACAGGCAAGGGAACCGGACAAAGCAGGCAAGAGACTGAGGTGAGAA  
AACAGTGACACAAGAACTCAGCGGATCTCGTATTCATTGAACCTAGAAG  
CTGCTCGTTGACCCACGTTTTCCGACCGAAGGCACCGGCCCTCTGCTC  
ATCTAGCGACAACCTGTTGAAGGCTATGGTGTACAATCGTTCGCAACCA  
TAAAAAACAGTTCGGACGGGCTTGAGCCTATCCCCCTCGAGGTAGAAA  
GGCGACACTCTCTTCCAACCTGACGAATGGATCCAAA

>TgCtPRC2

CCCTTCCTGTTTGTCTTCTGCAGGTACGACCAGAAAGGCGTAGTGTACT  
CCAATAAAATCCAGAAAGGCAGGGCAACGTGTCTGCACGCCACGAACC  
ACGCAGCTTCCTCAACCGCCTGCTGAGCACGCAACCCTGGACCCCCTT  
CAGGCGATAGCGGAATGAGCAATTGTGCACCTGGGGCAGAAACAGTTC  
TTACAGGCAAGGGAACCGGACAAAGCAGGCAAGAGACTGAGGTGAGAA  
AACAGTGACACAAGAACTCAGCGGATCTCGTATTCATTGAACCTAGAAG  
CTGCTCGTTGACCCACGTTTTCCGACCGAAGGCACCGGCCCTCTGCTC  
ATCTAGCGACAACCTGTTGAAGGCTATGGTGTACAATCGTTCGCAACCA  
TAAAAAACAGTTCGGACGGGCTTGAGCCTATCCCCCTCGAGGTAGAAA  
GGCGACACTCTCTTCCAACCTGACGAATGGATCCAAA

>GAB2-2007-GAL-DOM2

CCCTTCCTGTTTGTCTTCTGCAGGTACGACCAGAAAGGCGTAGTGTACT  
CCAATAAAATCCAGAAAGGCAGGGCAACGTGTCTGCACGCCACGAACC  
ACGCAGCTTCCTCAACCGCCTGCTGAGCACGCAACCCTGGACCCCCTT  
CAGGCGATAGCGGAATGAGCAATTGTGCACCTGGGGTATAAACAGTTC  
TTACAGGCAAGGGAACCGGACAAAGCAGGCAAGAGACTGAGGTGAGAA  
AACAGTGACACAAGAACTCAGCGGATCTCATATTCATTGAACCTAGAAG  
CTGCTCGTTGACCCACGTTTTCCGACCGAAGGCACCGGCCCTCTGCTC  
ATCTAGCGACAACCTGTTGAAGGCTATGGTGTACAATCGTTCGCAACCA  
TAAAAAACAGTTCGGACGGGCTTGAGCCTATCCCCCTCGAGGTAGAAA  
GGCGACACTCTCTTCCAACCTGACGAATGGATCCAAA

>TgCtCo5

CCCTTCCTGTTTGTCTTCTGCAGGTACGACCAGAAAGGCGTAGTGTACT

CCAATAAAATCCAGAAAGGCAGGGCAACGTGTCTGCACGCCACGAACC  
ACGCAGCTTCCTCAACCGCCTGCTGAGCACGCAACCCTGGACCCCCTT  
CAGGCGATAGCGGAATGAGCAATTGTGCACCTGGGGTATAAACAGTTC  
TTACAGGCAAGGGAACCGGACAAAGCAGGCAAGAGACTGAGGTGAGAA  
AACAGTGACACAAGAACTCAGCGGATCTCATATTCATTGAACCTAGAAG  
CTGCTCGTTGACCCACGTTTTCCGACCGAAGGCACCGGCCCTCTGCTC  
ATCTAGCGACAACCTGTTGAAGGCTATGGTGTACAATCGTTCGCAACCA  
TAAAAAACAGTTCGGACGGGCTTGAGCCTATCCCCCTCGAGGTAGAAA  
GGCGACACTCTCTTCCAACCTGACGAATGGATCCAAAA

>TgCatJpOk1

AAAGATTGATGAAACAGAAAGAATGATGTGGCGTGAGCCCGCAAAAGT  
GACTATAACACGAACCGTAAAGACTCGGCAAAAAGTGAAGGCAAACGA  
GGCACACCACAACCAGCGAAGCTGCAGGAATAATACAGTCAGTTCCCT  
CGATCGCAGCACTCGAATACAGCTGCCGAAAAGCATACTGCCCTTCCT  
GTTTGTTCCTGCAGGTACGACCAGAAAGGCGTAGTGTACTCCAATAAA  
ATCCAGAAAGGCAGGGCAACGTGTCTGCACGCCACGAACCACGCAGCT  
TCCTCAACCGCCTGCTGAGCACGCAACCCTGGACCCCCTTCAGGCGAT  
AGCGGAATGAGCAATTGTGCACCTGGGGCAGAAACAGTTCTTACAGGC  
AAGGGAACCGGACAAAGCAGGCAAGAGACTGAGGTGAGAAAACAGTGA  
CACAAGAACTCAGCGGATCTCGTATTCATTGAACCTAGAAGCTGCTCG  
TTGACCCACGTTTTCCGACCGAAGGCACCGGCCCTCTGCTCATCTAGC  
GACAACCTGTTGAAGGCTATGGTGTACAATCGTTCGCAACCATAAAAAAC  
AGTTCGGACGGGCTTGAGCCTATCCCCCTCGAGGTAGAAAGGCGACAC  
TCTCTTCCAACCTGACGAATGGATCCAAAACGCA

>TgCatJpOk2

TGAGCACAAGAAGAGCAAACGAAACTAACCGGAAACAGGAAACAGTTG  
ACTCTCCCCTTCCGCGCTAGGCACGCACCCCGTGAGTTAACAAAGATG  
GAAAGATTGATGAAACAGAAAGAATGATGTGGCGTGAGCCCGCAAAAG  
TGA CTATAACACGAACCGTAAAGACTCGGCAAAAAGTGAAGGCAAACG  
AGGCACACCACAACCAGCGAAGCTGCAGGAATAATACAGTCAGTTCCC  
TCGATCGCAGCACTCGAATACAGCTGCCGAAAAGCATACTGCCCTTCC  
TGTTTGTTCCTGCAGGTACGACCAGAAAGGCGTAGTGTACTCCAATAA  
AATCCAGAAAGGCAGGGCAACGTGTCTGCACGCCACGAACCACGCAGC  
TTCCCTCAACCGCCTGCTGAGCACGCAACCCTGGACCCCCTTCAGGCGA

TAGCGGAATGAGCAATTGTGCACCTGGGGCAGAAACAGTTCTTACAGG  
CAAGGGAACCGGACAAAGCAGGCAAGAGACTGAGGTGAGAAAACAGTG  
ACACAAGAACTCAGCGGATCTCGTATTCATTGAACCTAGAAGCTGCTC  
GTTGACCCACGTTTTTCCGACCGAAGGCACCGGCCCTCTGCTCATCTAG  
CGACAACCTGTTGAAGGCTATGGTGTACAATCGTTCGCAACCATAAAAA  
ACAGTTCGGACGGGCTTGAGCCTATCCCCCTCGAGGTAGAAAGGCGAC  
ACTCTCTTCCAACCTGACGAATGGATCCAAAACGCAGCAAGCATG

>TgCatJpOk3

CAGAAACACGCAGAGAATATGTCACCGATTACACACCCGGAAATGCGAA  
AAAATGAGCAGAACACGATGAGCACAAGAAGAGCAAACGAAACTAACCG  
GAAACAGGAAACAGTTGACTCTCCCCTTCCGCGCTAGGCACGCACCCC  
GTGAGTTAACAAAGATGGAAAGATTGATGAAACAGAAAGAATGATGTG  
GCGTGAGCCCGCAAAGTGACTATAACACGAACCGTAAAGACTCGGCA  
AAAAGTGAAGGCAAACGAGGCACACCACAACCAGCGAAGCTGCAGGAA  
TAATACAGTCAGTTCCCTCGATCGCAGCACTCGAATACAGCTGCCGAAA  
AGCATACTGCCCTTCCTGTTTGTCTGTCAGGTACGACCAGAAAGGCG  
TAGTGTACTCCAATAAAATCCAGAAAGGCAGGGCAACGTGTCTGCACG  
CCACGAACCACGCAGCTTCCTCAACCGCCTGCTGAGCACGCAACCCTG  
GACCCCTTCAGGCGATAGCGGAATGAGCAATTGTGCACCTGGGGCA  
GAAACAGTTCTTACAGGCAAGGGAACCGGACAAAGCAGGCAAGAGACT  
GAGGTGAGAAAACAGTGACACAAGAACTCAGCGGATCTCGTATTCATT  
GAACCTAGAAGCTGCTCGTTGACCCACGTTTTTCCGACCGAAGGCACCG  
GCCCTCTGCTCATCTAGCGACAACCTGTTGAAGGCTATGGTGTACAATC  
GTTTCGCAACCATAAAAAACAGTTCGGACGGGCTTGAGCCTATCCCCCT  
CGAGGTAGAAAGGCGACACTCTCTTCCAACCTGACGAATGGATCCAAA  
CGCAGCAAGCATGGGAACAAAGATTACGGACACTCAGCGTTCGAGTCT  
TACCGCCGCCCACGTTGGGCCATGATTTCTGCCTCTGTTGAGTCGC  
TCGTCTCC

>TgCatJpOk4

TGAGCAGAACACGATGAGCACAAGAAGAGCAAACGAAACTAACCGGAA  
ACAGGAAACAGTTGACTCTCCCCTTCCGCGCTAGGCACGCACCCCGTG  
AGTTAACAAAGATGGAAAGATTGATGAAACAGAAAGAATGATGTGGCG  
TGAGCCCGCAAAGTGACTATAACACGAACCGTAAAGACTCGGCAAAA  
AGTGAAGGCAAACGAGGCACACCACAACCAGCGAAGCTGCAGGAATAA

TACAGTCAGTTCCTCGATCGCAGCACTCGAATACAGCTGCCGAAAAG  
CATACTGCCCTTCCTGTTTGTCTGCAGGTACGACCAGAAAGGCGTA  
GTGTACTIONCAATAAAATCCAGAAAGGCAGGGCAACGTGTCTGCACGCC  
ACGAACCACGCAGCTTCCTCAACCGCCTGCTGAGCACGCAACCCTGGA  
CCCCCTTCAGGCGATAGCGGAATGAGCAATTGTGCACCTGGGGCAGA  
AACAGTTCTTACAGGCAAGGGAACCGGACAAAGCAGGCAAGAGACTGA  
GGTGAGAAAACAGTGACACAAGAACTCAGCGGATCTCGTATTCATTGA  
ACCTAGAAGCTGCTCGTTGACCCACGTTTTCCGACCGAAGGCACCGGC  
CCTCTGCTCATCTAGCGACAACCTGTTGAAGGCTATGGTGTACAATCGT  
TCGCAACCATAAAAAACAGTTCGGACGGGCTTGAGCCTATCCCCCTCG  
AGGTAGAAAGGCGACACTCTCTTCCAACCTGACGAATGGATCCAAAACG  
C

>TgCatJpTy1/k-3

GACAGAAACACGCAGAGAATATGTCACCGATTACACACCCGGAAATGC  
GAAAAAATGAGCAGAACACGATGAGCACAAGAAGAGCAAACGAACTAA  
CCGGAAACAGGAAACAGTTGACTCTCCCCTTCCGCGCTAGGCACGCAC  
CCCGTGAGTTAACAAAGATGGAAAGATTGATGAAACAGAAAGAATGAT  
GTGGCGTGAGCCCGCAAAGTGACTATAACACGAACCGTAAAGACTCG  
GCAAAAAGTGAAGGCAAACGAGGCACACCACAACCAGCGAAGCTGCAG  
GAATAATACAGTCAGTTCCTCGATCGCAGCACTCGAATACAGCTGCC  
GAAAAGCATACTGCCCTTCCTGTTTGTCTGCAGGTACGACCAGAAA  
GGCGTAGTGTACTCCAATAAAATCCAGAAAGGCAGGGCAACGTGTCTG  
CACGCCACGAACCACGCAGCTTCCTCAACCGCCTGCTGAGCACGCAAC  
CCTGGACCCCCTTCAGGCGATAGCGGAATGAGCAATTGTGCACCTGG  
GGCAGAAACAGTTCTTACAGGCAAGGGAACCGGACAAAGCAGGCAAGA  
GACTGAGGTGAGAAAACAGTGACACAAGAACTCAGCGGATCTCGTATT  
CATTGAACCTAGAAGCTGCTCGTTGACCCACGTTTTCCGACCGAAGGC  
ACCGGCCCTCTGCTCATCTAGCGACAACCTGTTGAAGGCTATGGTGTAC  
AATCGTTCGCAACCATAAAAAACAGTTCGGACGGGCTTGAGCCTATCC  
CCCCTCGAGGTAGAAAGGCGACACTCTCTTCCAACCTGACGAATGGATC  
CAAACGCAGCAAGCATGGGAACAAAGATTA

>TgCatJpGi1/TaJ

TACACACCCGGAAATGCGAAAAAATGAGCAGAACACGATGAGCACAAG  
AAGAGCAAACGAACTAACCGGAAACAGGAAACAGTTGACTCTCCCCT



TNTGCGCCAGGCACGCACCCCGTGAGTTAACAAAGATGGAAAGATTGA  
TGAAACAGAAAGAATGATGTGGCGTGAGCCCGCAAAAGTGACTATAAC  
ACGAACCGTAAAGACTCGGC AAAAGTGAAGGCAAACGAGGCACACCA  
CAACCAGCGAAGCTGTAGGAATAATACAGTCAGTTCCTCGATCGCGG  
CACTCGAATACAGCTGCCGAAAAGCATACTGCCCTTCCTGTTTGTTC  
TGCAGGTACGACCAGAAAGGCGTAGTGTACTCCAATAAAGTCCAGAAA  
GGCAGGGCAACGTGTCTGCACGCCACGAACCACGCAGCTTCCTCAACC  
GCCTGCTGAGCACGCAACCCTGGACCCCTTCAGGCGATAGCGGAAT  
GAGCAATTGTGCACCTGGGGTATAAACAGTTCTTACAGGCAAGGGAAC  
CGGACAAAGCAGGCAAGAGACTGAGGTGAGAAAACAGTGACACAAGAA  
CTCAGCGGATCTCATATTCATTGAACCTAGAAGCTGCTCGTTGACCCA  
CGTTTTCCGACCGAAGGCACCGGCCCTCTGCTCATCTAGCGACAACCTG  
TTGAAGGCTATGGTGTACAATCGTTCGCAACCATAAAAAACAGTTCGG  
ACGGGCTTGAGCCTATCCCCCTCGAGGTAGAAAGGCGACACTCTCTTC  
CAACTGACGAATGGATCCAAAACGCAGCAAGCATGGGACCAAAGATT  
A

>TgGoatJpOk1

TGACAGAAACACGCAGAGAATATGTCACCGATTACACACCCGGAAATGC  
GAAAAAATGAGCAGAACACGATGAGCACAAGAAGAGCAAACGAACTAA  
CCGGAAACAGGAAACAGTTGACTCTCCCCTTCCGCGCTAGGCACGCAC  
CCCGTGAGTTAACAAAGATGGAAAGATTGATGAAACAGAAAGAATGAT  
GTGGCGTGAGCCCGCAAAAGTGACTATAACACGAACCGTAAAGACTCG  
GCAAAAAGTGAAGGCAAACGAGGCACACCACAACCAGCGAAGCTGCAG  
GAATAATACAGTCAGTTCCTCGATCGCAGCACTCGAATACAGCTGCC  
GAAAAGCATACTGC<sub>c</sub>CTTCCTGTTTGTTCCTGCAGGTACGACCAGAAA  
GGCGTAGTG<sub>tact</sub>C<sub>caat</sub>AAAATCCAGAAAGGCAGGGCAACGTGTCTGCAC  
GCCAC<sub>g</sub>AACCACGCAGCTTCCTCAACCGCCTGCTGAGCACGCAACCCT  
GGACCCCTTCAGGCGATAGCGGAATGAGCAATTGTGCACCTGGGGC  
AGAAACAGTTCTTACAGGCAAGGGAACCGGACAAAGCAGGCAAGAGAC  
TGAGGTGAGAAAACAGTGACACAAGA ACTCAGCGGATCTCGTATTCAT  
TGAACCTAGAAGCTGCTCGTTGACCCACGTTTTTCCGACCGAAGGCACC  
GGCCCTCTGCTCATCTAGCGACA ACTGTTGAAGGCTATGGTGT<sub>ca</sub>ATC  
GTTTCGCAACCATAAAAAACAGTTCGG<sub>a</sub>cGGGCTTGAGCCTATCCCCCT  
CGAGGT<sub>g</sub>AAAGGCGACACTCTCTTC<sub>caa</sub>CTGACGAATGGATCCAAACG

>TgGoatJpOk2

AGAAACACGCAGAGAATATGTCACCGATTACACACCCGGAAATGCGAAA  
AAATGAGCAGAACACGATGAGCACAAGAAGAGCAAACGAACTAACCG  
GAAACAGGAAACAGTTGACTCTCCCCTTCCGCGCTAGGCACGCACCCC  
GTGAGTTAACAAAGATGGAAAGATTGATGAAACAGAAAGAATGATGTG  
GCGTGAGCCCGCAAAAGTGACTATAACACGAACCGTAAAGACTCGGCA  
AAAAGTGAAGGCAAACGAGGCACACCACAACCAGCGAAGCTGCAGGAA  
TAATACAGTCAGTTCCCTCGATCGCAGCACTcgAAcgCAGCTGCCGAAAA  
GCATACTGCCCTTCCTGTTTGTCTGCAGGTACGACCAGAAAGGCGT  
AGTGTACTCCAATAAAATCCAGAAAGGCAGGGCAACGTGTCTGCACGC  
CACGAACCACGCAGCTTCCTCAACCGCCTGCTGAGCACGCAACCCTGG  
ACCCCCTTCAGGCGATAGCGGAATGAGCAATTGTGCACCTGGGGCAGA  
AACAGTTCTTACAGGCAAGGGAACCGGACAAAGCAGGCAAGAGACTGA  
GGTGAGAAAACAGTGACACAAGAACTCAGCGGATCTCGTATTCATTGA  
ACCTAGAAGCTGCTCGTTGACCCACGTTTTCCGACCGAAGGCACCGGC  
CCTCTGCTCATCTAGCGACAACCTGTTGAAGGCTATGGTGTACAATCGT  
TCGCAACCATAAAAAACAGTTCGGACGGGCTTGAGCCTATCCCCCTCG  
AGGTAGAAAGGCGACACTCTCTTCCAACCTGACGAATGGATCCAAAACG  
CAGCAAGCATG

>TgGoatJpOk3

GAACTAACCGGAAACAGGAAACAGTTGACTCTCCCCTTCCGCGCTAG  
GCACGCACCCCGTGAGTTAACAAAGATGGAAAGATTGATGAAACAGAA  
AGAATGATGTGGCGTGAGCCCGCAAAAGTGACTATAACACGAACCGTA  
AAGACTCGGCAAAAAGTGAAGGCAAACGAGGCACACCACAACCAGCGA  
AGCTGCAGGAATAATACAGTCAGTTCCCTCGATCGCAGCACTCGAATAC  
AGCTGCCGAAAAGCATACTGCCCTTCCTGTTTGTCTGCAGGTACGA  
CCAGAAAGGCGTAGTGTACTCCAATAAAATCCAGAAAGGCAGGGCAAC  
GTGTCTGCACGCCACGAACCACGCAGCTTCCTCAACCGCCTGCTGAGC  
ACGCAACCCTGGACCCCTTCAGGCGATAGCGGAATGAGCAATTGTGC  
ACCTGGGGCAGAAACAGTTCTTACAGGCAAGGGAACCGGACAAAGCAG  
GCAAGAGACTGAGGTGAGAAAACAGTGACACAAGAACTCAGCGGATCT  
CGTATTCATTGAACCTAGAAGCTGCTCGTTGACCCACGTTTTCCGACC  
GAAGGCACCGGCCCTCTGCTCATCTAGCGACAACCTGTTGAAGGCTATG  
GTGTACAATCGTTCGCAACCATAAAAAACAGTTCGGACGGGCTTGAGC  
CTATCCCCCTCGAGGTAGAAAGGCGACACTCTCTTCCAACCTGACGAAT

GGATCCAAAACGCAGCAAGCA

>TgGoatJpOk4

AATGTTCCACCCTGAACCTGGCATGGAGTCCGGGAACGGGGAAGGAA  
GGACGACGAAAACCGAGCCGGGCAAGTCAGGGTGGTAAGAGATTCTAT  
TTTTAACATTTCAACGAGCTGTTGAGCTGTGGTATCTAAAGCGCTAGG  
GGATCTTAAGATTAATACAACAATTGANTAATGGTCTCTGGGAACGAG  
TAGGGATTGGNTGGAATTAGGTGCATTAATGACAGAAACAGGCAGAGA  
ATATGTCACCGATTACACACCCGGAAATGCGAAAAAATGAGCAGAACAC  
GATGAGCACAAGAAGAGCAAACGAACTAACC GGAAACAGGAAACAGT  
TGA CTCTCCCCTTCCGCGCTAGGCACGCACCCCGTGAGTTAACAAAGA  
TGGA AAGATTGATGAAACAGAAAGAATGATGTGGCGTGAGCCCGCAA  
AGTGACTATAACACGAACCGTAAAGACTCGGCAAAAAGTGAAGGCAAAC  
GAGGCACACCACAACCAGCGAAGCTGCAGGAATAATACAGTCAGTTCC  
CTCGATCGCAGCACTCGAATACAGCTGCCGAAAAGCATACTGCCCTTC  
CTGTTTGTCTTCTGCAGGTACGACCAGAAAGGCGTAGTGTACTCCAATA  
AAATCCAGAAAGGCAGGGCAACGTGTCTGCACGCCACGAACCACGCAG  
CTTCCTCAACCGCCTGCTGAGCACGCAACCCTGGACCCCTTCAGGCG  
ATAGCGGAATGAGCAATTGTGCACCTGGGGCAGAAACAGTTCTTACAG  
GCAAGGGAACCGGACAAAGCAGGCAAGAGACTGAGGTGAGAAAACAGT  
GACACAAGAACTCAGCGGATCTCGTATTCATTGAACCTAGAAGCTGCT  
CGTTGACCCACGTTTTCCGACCGAAGGCACCGGCCCTCTGCTCATCTA  
GCGACA ACTGTTGAAGGCTATGGTGTACAATCGTTGCAACCATAAAA  
AACAGTTCGGACGGGCTTGAGCCTATCCCCCTCGAGGTAGAAAGGCGA  
CACTCTCTTCCA ACTGACGAATGGATCCAAAACGCAG

>TgGoatJpOk5

TGACAGAAACACGCAGAGAATATGTCACCGATTACACACCCGGAAATGC  
GAAAAAATGAGCAGAACACGATGAGCACAAGAAGAGCAAACGAACTAA  
CCGGAAACAGGAAACAGTTGACTCTCCCCTTCCGCGCTAGGCACGCAC  
CCCGTGAGTTAACAAAGATGGAAAGATTGATGAAACAGAAAGAATGAT  
GTGGCGTGAGCCCGCAA AAGTGA CTATAACACGAACCGTAAAGACTCG  
GCAAAAAGTGAAGGCAAACGAGGCACACCACAACCAGCGAAGCTGCAG  
GAATAATACAGTCAGTTCCCTCGATCGCAGCACTCGAATACAGCTGCC  
GAAAAGCATACTGCCCTTCCTGTTTGTCTTCTGCAGGTACGACCAGAAA  
GGCGTAGTGTACTCCAATAAAAATCCAGAAAGGCAGGGCAACGTGTCTG

CACGCCACGAACCACGCAGCTTCCTCAACCGCCTGCTGAGCACGCAAC  
CCTGGACCCCCTTCAGGCGATAGCGGAATGAGCAATTGTGCACCTGG  
GGCAGAAACAGTTCTTACAGGCAAGGGAACCGGACAAAGCAGGCAAGA  
GACTGAGGTGAGAAAACAGTGACACAAGAAGCTCAGCGGATCTCGTATT  
CATTGAACCTAGAAGCTGCTCGTTGACCCACGTTTTCCGACCGAAGGC  
ACCGGCCCTCTGCTCATCTAGCGACAAGTGTGAAGGCTATGGTGTAC  
AATCGTTCGCAACCATAAAAAACAGTTCGGACGGGCTTGAGCCTATCC  
CCCTCGAGGTAGAAAGGCGACACTCTCTTCCAAGTACGAATGGATCC  
AAAACGCAGCAAGCATGGGAAC

>TgGoatJpOk6

CGGAAATGCGAAAAAATGAGCAGAACACGATGAGCACAAGAAGAGCAA  
ACGAAACTAACCGGAAACAGGAAACAGTTGACTCTCCCCTTCCGCGCT  
AGGCACGCACCCCGTGAGTTAACAAAGATGGAAAGATTGATGAAACAG  
AAAGAATGATGTGGCGTGAGCCCGCAAAGTGACTATAACACGAACCG  
TAAAGACTCGGCAAAAAGTGAAGGCAAACGAGGCACACCACAACCAGC  
GAAGCTGCAGGAATAATACAGTCAGTTCCTCGATCGCAGCACTCGAA  
TACAGCTGCCGAAAAGCATACTGCCCTTCTGTTTGTCTTCTGCAGGTA  
CGACCAGAAAGGCGTAGTGTACTCCAATAAAATCCAGAAAGGCAGGGC  
AACGTGTCTGCACGCCACGAACCACGCAGCTTCCTCAACCGCCTGCTG  
AGCACGCAACCCTGGACCCCCTTCAGGCGATAGCGGAATGAGCAATTG  
TGCACCTGGGGCAGAAACAGTTCTTACAGGCAAGGGAACCGGACAAAG  
CAGGCAAGAGACTGAGGTGAGAAAACAGTGACACAAGAAGCTCAGCGGA  
TCTCGTATTCATTGAACCTAGAAGCTGCTCGTTGACCCACGTTTTCCG  
ACCGAAGGCACCGGCCCTCTGCTCATCTAGCGACAAGTGTGAAGGCT  
ATGGTGTACAATCGTTCGCAACCATAAAAAACAGTTCGGACGGGCTTG  
AGCCTATCCCCCTCGAGGTAGAAAGGCGACACTCTCTTCCAAGTACG  
AATGGATCCAAAACGCAGCAAGCATGGGNNCAAAGATTAA

>TgGoatJpOk7

AGAGAATATGTCACCGATTACACACCCGGAAATGCGAAAAAATGAGCAG  
AACACGATGAGCACAAGAAGAGCAAAcGAAACTAACCGGAAACAGGAAA  
CAGTTGACTCTCCCCTTCCGCGCTAGGCACGCACCCCGTGAGTTAACA  
AAGATGGAAAGATTGATGAAACAGAAAGAATGATGTGGCGTGAGCCCG  
CAAAGTGACTATAACACGAACCGTAAAGACTCGGCAAAAAGTGAAGG  
CAAACGAGGCACACCACAACCAGCGAAGCTGCAGGAATAATACAGTCA

GTTCCCTCGATCGCAGCACTCGAATACAGCTGCCGAAAAGCATACTGC  
CCTTCCTGTTTGTCTTCTGCAGGTACGACCAGAAAGGCGTA<sub>g</sub>TGTACTC  
CAATAAAATCCAGAAAGGCAGGGCAACGTGTCTGCACGCCACGAACCA  
CGCAGCTTCCTCAACCGCCTGCTGAGCACGCAACCCTGGACCCCCTTC  
AGGCGATAGCGGAATGAGCAATTGTGCACCTGGGGCAGAAACAGTTCT  
TACAGGCAAGGGAACCGGACAAAGCAGGCAAGAGACTGAGGTGAGAAA  
ACAGTGACACAAGA<sub>ACT</sub>CAGCGGATCTCGTATTCATTGAACCTAGAAGC  
TGCTCGTTGACCCACGTTTTCCGACCGAAGGCACCGGCCCTCTGCTCA  
TCTAGCGACA<sub>ACT</sub>GTTGAAGGCTATGGTGTACAATCGTTCGCAACCAT  
AAAAACAGTTCGGACGGGCTTGAGCCTATCCCCCTCGAGGTAGAAAG  
GCGACACTCTCTTCCA<sub>ACT</sub>GACGAATGGATCCAAAACGCAGCAAGCAT  
G

>TgGoatJpOk8

CAGAGAATATGTCACCGATTACACACCCGGAAATGNGAAAAAATGAGC  
AGAACACGATGAGCACAAGAAGAGCAAACGAACTA<sub>ACCG</sub>GAAACAGG  
AAACAGTTGACTCTCCCCTTCCGCGCTAGGCACGCACCCCGTGAGTTA  
ACAAAGATGGAAAGATTGATGAAACAGAAAGAATGATGTGGCGTGAGC  
CCGCAAAAGTGACTATAACACGAACCGTAAAGACTCGGCAAAAAGTGAA  
GGCAAACGAGGCACACCACAACCAGCGAAGCTGCAGGAATAATACAGT  
CAGTTCCTCGATCGCAGCACTCGAATACAGCTGCCGAAAAGCATACT  
GCCCTTCCTGTTTGTCTTCTGCAGGTACGACCAGAAAGGCGTA<sub>g</sub>TGTAC  
TCCAATAAAATCC<sub>Ag</sub>AAAGGCAGGGCAACGTGTCTGCACGCCACGAAC  
CACGCAGCTTCCTCAACCGCCTGCTGAGCACGCAACCCTGGACCCCCT  
TCAGGCGATAGCGGAATGAGCAATTGTGCACCTGGGGCAGAAACAGTT  
CTTACAGGCAAGGGAACCGGACAAAGCAGGCAAGAGACTGAGGTGAGA  
AAACAGTGACACAAGA<sub>ACT</sub>CAGCGGATCTCGTATTCATTGAACCTAGAA  
GCTGCTCGTTGACCCACGTTTTCCGACCGAAGGCACCGGCCCTCTGC  
TCATCTAGCGACA<sub>ACT</sub>GTTGAAGGCTATGGTGTACAATCGTTCGCAAC  
CATAAAAAACAGTTCGGACGGGCTTGAGCCTATCCCCCTCGAGGTAGA  
AAGGCGACACTCTCTTCCA<sub>ACT</sub>GACGAATGGATCCAAAACGCAGCAAG  
CATGGG

>TgGoatJpOk9

AGAAACACGCAGAGAATATGTCACCGATTACACACCCGGAAATGCGAAA  
AAATGAGCAGAACACGATGAGCACAAGAAGAGCAAACGAACTA<sub>ACCG</sub>

GAAACAGGAAACAGTTGACTCTCCCCTTCCGCGCTAGGCACGCACCCC  
GTGAGTTAACAAAGATGGAAAGATTGATGAAACAGAAAGAATGATGTG  
GCGTGAGCCCGCAAAAGTGACTATAACACGAACCGTAAAGACTCGGCA  
AAAAGTGAAGGCAAACGAGGCACACCACAACCAGCGAAGCTGCAGGAA  
TAATACAGTCAGTTCCCTCGATCGCAGCACTCGAATACAGCTGCCGAAA  
AGCATACTGCCCTTCCTGTTTGTCTGTCAGGTACGACCAGAAAGGCG  
TAGTGTACTCCAATAAAATCCAGAAAGGCAGGGCAACGTGTCTGCACG  
CCACGAACCACGCAGCTTCCTCAACCGCCTGCTGAGCACGCAACCCTG  
GACCCCTTCAGGCGATAGCGGAATGAGCAATTGTGCACCTGGGGCA  
GAAACAGTTCTTACAGGCAAGGGAACCGGACAAAGCAGGCAAGAGACT  
GAGGTGAGAAAACAGTGACACAAGAACTCAGCGGATCTCGTATTCATT  
GAACCTAGAAGCTGCTCGTTGACCCACGTTTTCCGACCGAAGGCACCG  
GCCCTCTGCTCATCTAGCGACAACCTGTTGAAGGCTATGGTGTACAATC  
GTTTCGCAACCATAAAAAACAGTTCGGACGGGCTTGAGCCTATCCCCCT  
CGAGGTAGAAAGGCGACACTCTCTTCCAACCTGACGAATGGATCCAAAA  
CGCAGCAAGCATG

>TgGoatJpOk10

TACTGCCCTTCCTGTTTGTCTGTCAGGTACGACCAGAAAGGCGTAGT  
GTACTCCAATAAAATCCAGAAAGGCAGGGCAACGTGTCTGCACGCCAC  
GAACCACGCAGCTTCCTCAACCGCCTGCTGAGCACGCAACCCTGGACC  
CCCTTCAGGCGATAGCGGAATGAGCAATTGTGCACCTGGGGCAGAAAC  
AGTTCTTACAGGCAAGGGAACCGGACAAAGCAGGCAAGAGACTGAGGT  
GAGAAAACAGTGACACAAGAACTCAGCGGATCTCGTATTCATTGAACC  
TAGAAGCTGCTCGTTGACCCACGTTTTCCGACCGAAGGCACCGGCCCT  
CTGCTCATCTAGCGACAACCTGTTGAAGGCTATGGTGTACAATCGTTTCG  
CAACCATAAAAAACAGTTCGGACGGGCTTGAGCCTATCCCCCTCGAGG  
TAGAAAGGCGACACTCTCTTCCAACCTGACGAATGGATCCAAAACGCAG  
CAAG

>TgGoatJpOk11

CACGCAGAGAATATGTCACCGATTACACACCCGGAAATGCGAAAAAATG  
AGCAGAACACGATGAGCACAAGAAGAGCAAACGAACTAACCGGAAACA  
GGAAACAGTTGACTCTCCCCTTCTGCGCCAGGCACGCACCCCGTGAGT  
TAACAAAGATGGAAAGATTGATGAAACAGAAAGAATGATGTGGCGTGA  
GCCCGCAAAAGTGACTATAACACGAACCGTAAAGACTCGGCAAAAAGT

GAAGGCAAACGAGGCACACCACAACCAGCGAAGCTGTAGGAATAATAC  
AGTCAGTTCCTCGATCGCGGCACTCGAATACAGCTGCCGAAAAGCAT  
ACTGCCCTTCCTGTTTGTCTGCAGGTACGACCAGAAAGGCGTAGTG  
TACtCcaataAAGTCCAGAAAGGCAGGGCAACGTGTCTGCACGCCACGAA  
CCACGCAGCTTCCTCAACCGCCTGCTGAGCACGCAACCCTGGACCCCC  
TTCAGGCGATAGCGGAATGAGCAATTGTGCACCTGGGGTATAAACAGT  
TCTTACAGGCAAGGGAACCGGACAAAGCAGGCAAGAGACTGAGGTGAG  
AAAACAGTGACACAAGAACTCAGCGGATCTCATATTCATTGAACCTAGA  
AGCTGCTCGTTGACCCACGTTTTCCGACCGAAGGCACCGGCCCTCTG  
CTCATCTAGCGACAACCTGTTGAAGGCTATGGTGTACAATCGTTCGCAA  
CCATAAAAAACAGTTCGGACGGGCTTGAGCCTATCCCCCTCGAGGTAG  
AAAGGCGACACTCTCTTCCAACCTGACGAATGGATCCAAAACGCAGCAA  
GCATGGGAACAAAGATTA

Uracil phosphoribosyl transferase intron 1 (UPRT1)

>GT1

TGCGGCCCCCTTTCCTCCGCTTGCTGTTTAAATGCTCGTCCTCGTTTT  
CCTTCCTGCCGCATCCCCGTATATTTAAGGAGAGGGAAACAGGCGTG  
AGTTGGACGGAATGAAAGTTCTCGGCCTGTACGCCGGTTGTCGCGGT  
CGTTTGCAGATTGCTTTTTTCTTCGAATCGGTGCTGTAACCCTCGCGA  
AGAACGACGCTGCAAACGACTTCTCGAACTCTCAGTCGTGTACTTTAC  
GTGCTTCCTTTCAGGGACCTCCCCCTGCGTTACTCATTTGTATTCACA  
GCTACGAAGTGTCTTGCAAGGTGGATTCTGCCAGGCTCCATGTCTCA  
CTCGGTGCGTTTTTCGGAAAAGTTCATTGTGAACGTTCCCCTTGCGTG  
TCATGACTTTATCAG

>ME49

CCCGATATTCGACAAACGACCAGGAAGAAAGCATTCTCCAGGACATCAT  
CACGAGGTAATCCTTCAACCGAAGTTTGCTTTCGGTGACTCTGCCTGT  
TGGTTATACTGCGTGGCCTTCCCGTCCTGCGGCCCCCTTTCCTCCGC  
TTGCTGTTTAAATGCTCGTCCTCGTTTTCTTCCTGCCGCATCCCCGT  
ATATTTAAGGAGAGGGAAACAGGCGTGAGTTGGACGGCATGAAAGTT  
CTCGGCCTGTATGCCGGTTGTGGCGGTGCTTTGCAGATTGCTTTTTT  
CTTCGAATCGGTGCTGTAACCCTCGCGAAGAACGACGCTGCAAACGAC  
TTCTCGAACTCTCAGTCGTGTACTTTACGTGCTTCCTTTCAGGGACCT  
CCCCCGCGTTACTCATTTGTATTCACAGCTACGAAGTGTCTTGCAAG  
GTGGATTTCTGCCAGGCTCCATGTCTCACTCGTTGCGTTTTTCGGAAAA  
GTTTATTGTGAACGTTCCCCTTGCGTGTCATGACTTTATCAGGTTTCC  
CAATGTGGTGCTCATGAAGCAGACGGCTC

>VEG

TGCGGCCCCCTTTCCTCCGCTTGCTGTTTAAATGCTCGTCCTCGTTTT  
CCTTCCTGCCGCATCCCCGTATATTTAAGGAGAGGGAAACAGGCGTG  
AGTTGGACGGCATGAAAGTTCTCGGCCTGTATGCCGGTTGTGGCGGT  
CGTTTGCAGATTGCTTTTTTCTTCGAATCGGTGCTGTAACCCTCGCGA  
AGAACGACGCTGCAAACGACTTCTCGAACTCTCAGTCGTGTACTTTAC  
GTGCTTCCTTTCAGGGACCTCCCCCGCGTTACTCATTTGTATTCACA  
GCTACGAAGTGTCTTGCAAGGTGGATTTCTGCCAGGCTCCATGTCTCA  
CTCGTTGCGTTTTTCGGAAAAGTTCATTGTGAACGTTCCCCTTGCGTGT



CATGACTTTATCAG

>MAS

TGCGGCCCCCTTTCCTCCGCTTGCTGTTTAAATGCTCGTCCTCGTTTT  
CCTTCCTGCCGCATCCCCGTATATTTAAGGAGAGGGAAACAGGCGTG  
AGTTGGACGGAATGAAAGTTCTCGGCCTGTACGCCGGTTGTCGCGGT  
CGTTTGCAGATTGCTTTTTTCTTCGAATCGGTGCTGTAACCCTCGAAG  
AAGAACGACGCTGCAAACGACTTGTCGAACTCTCAGTCGTGTACTTTA  
CGTGCTTCCTTTCAGGGACCTCCCTCCGCGTTACTCATTTGTATTCAC  
AGCTACGAAGTGTCTTGCAAGGTGGATTCGTGCCAGGCTCCATGTCTC  
ACTCGGTGCGTTTTTCGGAAAAGTTCATTGTGAACGTTCCCCTTGCGT  
GTCATGACTTTATCAG

>RUB

TGCCGCTCCCTTTCCTCCGCTTGCTGTTTAAATGCTCGTCCTCGTTTT  
CCTTCCTGCCGCATCCCCGTATATTTAAGGAGAGGGAAACAGGCGTG  
AGTTGGACGGAATGAAAGTTCTCGGCCTGTACGCCGGTTGTCGCGGT  
CGTCTGCAGATTGCTTTTTTCTTCGAATCGGTGCTGTAACCCTCGCGA  
AGAACGACGCTGCAAACGACTTCTCGAACTCTCAGTCGTGTACTTTAC  
GTGCTTCCTTTCAGGGACCTCCCCCGCGTTACTCATTTGTATTCACA  
GCTACGAAGTGTCTTGCAAGGTGGATTCGTGACAGGCTCCATGTCTCA  
CTCGGTGCATTTTCGGAAAAGTTCATTGTGAACGTTGCCCTTGCGTGT  
CATGACTTTATCAG

>FOU

TGCGGCCCCCTTTCCTCCGCTTGCTGTTTAAATGCTCGTCCTCGTTTT  
CCTTCCTGCCGCATCCCCGTATATTTAAGGAGAGGGAAACAGGCGTG  
AGTTGGACGGAATGAAAGTTCTCGGCCTGTACGCCGGTTGTCGCGGT  
CGTTTGCAGATTGCTTTTTTCTTCGAATCGGTGCTGTAACCCTCGCGA  
AGAACGACGCTGCAAACGACTTCTCGAACTCTCAGTCGTGTACTTTAC  
GTGCTTCCTTTCAGGGACCTCCCCCGCGTTACTCATTTGTATTCACA  
GCTACGAAGTGTCTTGCAAGGTGGATTCGTGACAGGCTCCATGTCTCA  
CTCGGTGCATTTTCGGAAAAGTTCATTGTGAACGTTGCCCTTGCGTGT  
CATGACTTTATCAG

>CAST

TGCGGCCCCCTTTCCTCCGCTTGCTGTTTAAATGCTCGTCCTCGTTTT  
CCTTCCTGCCGCATCCCCGTATATTTTAAGGAGAGGGAAACAGGCGTG  
AGTTGGACGGCATGACGGTTCTCGGCCTGTATGCCGGTTGTCGCGGT  
CGTTTGCAGATTGCTTTTTTTCTTCGAATCGGTGCTGTAACCCTCGCGA  
AGAACGACGCTGCAAACGACTTCTCGAACTCTCAGTCGTGTACTTTAC  
GTGCTTCCTTTCAGGGACCTCCCCCGCGTTACTCATTTGTATTCACA  
GCTACGAAGTGTCTTGCAAGGTGGATTTCTGCCAGGCTCCATGTCTCA  
CTCGTTGCGTTTTTCGGAAAAGTTCATTGTGAACGTTCCCCTTGCGTGT  
CATGACTTTATCAG

>TgCatBr5

TGCGGCCCCCTTTCCTCCGCTTGCTGTTTAAATGCTCGTCCTCGTTTT  
CCTTCCTGCCGCATCCCCGTATATTTTAAGGAGAGGGAAACAGGCGTG  
AGTTGGACGGAATGAAAGTTCTCGGCCTGTACGCCGGTTGTCGCGGT  
CGTTTGCAGATTGCTTTTTTTCTTCGAATCGGTGCTGTAACCCTCGAAG  
AAGAACGACGCTGCAAACGACTTGTCGAACTCTCAGTCGTGTACTTTA  
CGTGCTTCCTTTCAGGGACCTCCCTCCGCGTTACTCATTTGTATTCAC  
AGCTACGAAGTGTCTTGCAAGGTGGATTCGTGCCAGGCTCCATGTCTC  
ACTCGGTGCGTTTTTCGGAAAAGTTCATTGTGAACGTTCCCCTTGCGT  
GTCATGACTTTATCAG

>p89

TGCCGCTCCCTTTCCTCCGCTTGCTGTTTAAATGCTCGTCCTCGTTTT  
CCTTCCTGCCGCATCCCCGTATATTTTAAGGAGAGGGAAACAGGCATG  
AGTTGGACGAAATGAAAGTTCTCGGCCTGTACGCCGGCTGTCGCGGT  
CGTTTGCAGATTGCTTTTTTTCTTCGAATCGGTGCTGTAACCCTCGCGA  
AGAACGACGCTGCAAACA ACTTCTCGAACTCTCAGTCGTGTACTTTAC  
GTGCTTCCTTTCAGGGACCTCCCCCGCGTTACTCATTTGTATTCACA  
GCTACGAAGTGTCTTGCAAGGTGGATTCGTGCCAGGCTCCATGTCTCA  
CTCGGTGCGTTTTTCGGAAAAGTTCATTGTGAACGTTCCCCTTGCGTG  
TCATGACTTTATCAG

>VAND

TGCCGCCCCCTTTCCTCCGCTTGCTGTTTAAATGCTCGTCCTCGTTTT  
CCTTCCTGCCGCATCCCCGTATATTTTAAGGAGAGGGAAACAGGCGTG  
AGTTGGACGGAATGAAAGTTCTCGGCCTGTACGCCGGTTGTCGCGGT

CGTTTGCAGATTGCTTTTTTCTTCGAATCGGTGCTGTAACCCTCGAAG  
AAGAACGACGCTGCAAACGACTTCTCGAACTCTCAGTCGTGTACTTTA  
CGTGCTTCCTTTCAGGGACCTCCCCCGCGTTACTCATTTGTATTCAC  
AGCTACGAAGTGTCTTGCAAGGTGGATTTCTGCCAGGCTCCATGTCTC  
ACTCGGTGCGTTTTTCGGAAAAGTTCATTGTGAACGTTCCCCTTGCGT  
GTCATGACTTTATCAG

>TgCgCa1

TGCGGCCCCCTTTCCTCCGCTTGCTGTTTAAATGCTCGTCCTCGTTTT  
GCTTCCTGCCGCATCCCCGTATATTTTAAGGAGAGGGAAACAGGCGTG  
AGTTGGACGGAATGAAAGTTCTCGGCCTGTACGCCCGTTGTCGCGGT  
CGTTTGCAGATTGCTTTTTTCTTCGAATCGGTGCTGTAACCCTCGCGA  
AGAACGACGCTGCAAACGACTTCTCGAACTCTCAGTCGTGTACTTTAC  
GTGCTTCCTTTCAGGGACCTCCCCCGCGTTACTCATTTGTATTCACA  
GCTACGAAGTGTCTTGCAAGGTGGATTTCTGCCAGGCTCCATGTCTCA  
CTCGGTGCGTTTTTCGGAAAAGTTCATTGTGAACGTTCCCCTTGCGTG  
TCATGACTTTATCAG

>ARI

TGCGGCCCCCTTTCCTCCGCTTGCTGTTTAAATGCTCGTCCTCGTTTT  
CCTTCCTGCCGCATCCCCGTATATTTTAAGGAGAGGGAAACAGGCGTG  
AGTTGGACGGCATGAAAGTTCTCGGCCTGTATGCCGGTTGTGGCGGT  
CGTTTGCAGATTGCTTTTTTCTTCGAATCGGTGCTGTAACCCTCGCGA  
AGAACGACGCTGCAAACGACTTCTCGAACTCTCAGTCGTGTACTTTAC  
GTGCTTCCTTTCAGGGACCTCCCCCGCGTTACTCATTTGTATTCACA  
GCTACGAAGTGTCTTGCAAGGTGGATTTCTGCCAGGCTCCATGTCTCA  
CTCGTTGCGTTTTTCGGAAAAGTTCATTGTGAACGTTCCCCTTGCGTGT  
CATGACTTTATCAG

>TgCtPRC2

TGCCGCCCCCTTTCCTCCGCTTGCTGTTTAAATGCTCGTCCTCGTTTT  
CCTTCCTGCCGCATCCCCGTATATTTTAAGGAGAGGGAAACAGGCGTG  
AGTTGGACGGAATGAAAGTTCTCGGCCTGTACGCCGGTTGTCGCGGT  
CGTTTGCAGATTGCTTTTTTCTTCGAATCGGTGCTGTAACCCTCGCGA  
AGAACGACGCTGCAAACGACTTCTCGAACTCTCAGTCGTGTACTTTAC  
GTGCTTCCTTTCAGGGACCTCCCCCGCGTTACTCATTTGTATTCACA

GCTACGAAGTGTCTTGCAAGGTGGATTTCGTGCCAGGCTCCATGTCTCA  
CTCGGTGCGTTTTTCGGAAAAGTTCATTGTGAACGTTCCCCTTGCGTG  
TCATGACTTTATCAG

>GAB2-2007-GAL-DOM2

TGCGGCCCCCTTTCCTCCGCTTGCTGTTTAAATGCTCGTCCTCGTTTT  
CCTTCCTGCCGCATCCCCGTATATTTTAAGGAGAGGGAAACAGGCGTG  
AGTTGGACGGAATGAAAGTTCTCGGCCTGTACGCCGGTTGTCGCGGT  
CGTTTGCAGATTGCTTTTTTCTTCGAATCGGTGCTGTAACCCTCGCGA  
AGAACGACGCTGCAAACGACTTCTCGAACTCTCAGTCGTGTACTTTAC  
GTGCTTCCTTTCAGGGACCTCCCCCGCGTTACTCATTTGTATTCACA  
GCTACGAAGTGTCTTGCAAGGTGGATTTCGTGACAGGCTCCATGTCTCA  
CTCGGTGCATTTTCGGAAAAGTTCATTGTGAACGTTGCCCTTGCGTGT  
CATGACTTTATCAG

>TgCtCo5

TGCCGCTCCCTTTCCTCCGCTTGCTGTTTAAATGCTCGTCCTCGTTTT  
CCTTCCTGCCGCATCCCCGTATATTTTAAGGAGAGGGAAACAGGCATG  
AGTTGGACGAAATGAAAGTTCTCGGCCTGTACGCCGGCTGTCGCGGT  
CGTTTGCAGATTGCTTTTTTCTTCGAATCGGTGCTGTAACCCTCGCGA  
AGAACGACGCTGCAAACAACCTTCTCGAACTCTCAGTCGTGTACTTTAC  
GTGCTTCCTTTCAGGGACCTCCCCCGCGTTACTCATTTGTATTCACA  
GCTACGAAGTGTCTTGCAAGGTGGATTTCGTGACAGGCTCCATGTCTCA  
CTCGGTGCATTTTCGGAAAAGTTCATTGTGAACGTTCCCCTTGCGTGT  
CATGACTTTATCAG

>TgCatJpOk1

GACCAGGAAGAAAGCATTCTCCAGGACATCATCACGAGGTAATCCTTC  
AACCGAAGTTTGCTTTCCTGACTCTGCCTGTTGGTTATACTGCGTGG  
CCTTCCCGTCCCTGCGGCCCCCTTTCCTCCGCTTGCTGTTTAAATGCTC  
GTCCTCGTTTTCTTCCTGCCGCATCCCCGTATATTTTAAGGAGAGGG  
AAACAGGCGTGAGTTGGACGGCATGAAAGTTCTCGGCCTGTATGCCG  
GTTGTGGCGGTCGTTTGCAGATTGCTTTTTTCTTCGAATCGGTGCTG  
TAACCCTCGCGAAGAACGACGCTGCAAACGACTTCTCGAACTCTCAGT  
CGTGTACTTTACGTGCTTCCTTTCAGGGACCTCCCCCGCGTTACTCA  
TTTGTATTCACAGCTACGAAGTGTCTTGCAAGGTGGATTTCTGCCAGG

CTCCATGTCTCACTCGTTGCGTTTTTCGGAAAAGTTCATTGTGAACGTT  
CCCCTTGCGTGTCATGACTTTATCAGGTTTCCCAATGTGGTG

>TgCatJpOk2

GAAGAAAGCATTCTCCAGGACATCATCACGAGGTAATCCTTCAACCGAA  
GTTTGCTTTCCGTGACTCTGCCTGTTGGTTATACTGCGTGGCCTTCCC  
GTCCTGCGGCCCCCTTTCCTCCGCTTGCTGTTTAAATGCTCGTCCTC  
GTTTTCCCTCCTGCCGCATCCCCGTATATTTTAAGGAGAGGGAAACAG  
GCGTGAGTTGGACGGCATGAAAGTTCTCGGCCTGTATGCCGGTTGTG  
GCGGTCGTTTGCAGATTGCTTTTTTCTTCGAATCGGTGCTGTAACCCT  
CGCGAAGAACGACGCTGCAAACGACTTCTCGAACTCTCAGTCGTGTAC  
TTTACGTGCTTCCTTTCAGGGACCTCCCCCGCGTTACTCATTTGTAT  
TCACAGCTACGAAGTGTCTTGCAAGGTGGATTTCTGCCAGGCTCCATG  
TCTCACTCGTTGCGTTTTTCGGAAAAGTTCATTGTGAACGTTCCCCTTG  
CGTGTCATGACTTTATCAGGTTTCCCAATGTGGTGCTCATGAA

>TgCatJpOk3

GGTAATCCTTCAACAGAAGTTTGCTTTCCGTGACTCTGCCTGTTGGTT  
ATACTGCGTGGCCTTCCCGTCCTGCGGCCCCCTTTCCTCCGCTTGCT  
GTTTAAATGCTCGTCCTCGTTTTCCCTCCTGCCGCATCCCCGTATATT  
TTAAGGAGAGGGAAACAGGCGTGAGTTGGACGGCATGAAAGTTCTCG  
GCCTGTATGCCGGTTGTGGCGGTCGTTTGCAGATTGCTTTTTTCTTC  
GAATCGGTGCTGTAACCCTCGCGAAGAACGACGCTGCAAACGACTTCT  
CGAACTCTCAGTCGTGTACTTTACGTGCTTCCTTTCAGGGACCTCCCC  
CCGCGTTACTCATTTGTATTCACAGCTACGAAGTGTCTTGCAAGGTGG  
ATTTCTGCCAGGCTCCATGTCTCACTCGTTGCGTTTTTCGGAAAAGTTC  
ATTGTGAACGTTCCCCTTGCGTGTCATGACTTTATCAGGTTTCCCAAT  
GTGGTGCTCATGAA

>TgCatJpOk4

ACCGAAGTTTGCTTTCCGTGACTCTGCCTGTTGGTTATACTGCGTGGC  
CTTCCCGTCCTGCGGCCCCCTTTCCTCCGCTTGCTGTTTAAATGCTCG  
TCCTCGTTTTCCCTCCTGCCGCATCCCCGTATATTTTAAGGAGAGGGA  
AACAGGCGTGAGTTGGACGGCATGAAAGTTCTCGGCCTGTATGCCGG  
TTGTGGCGGTCGTTTGCAGATTGCTTTTTTCTTCGAATCGGTGCTGT  
AACCTCGCGAAGAACGACGCTGCAAACGACTTCTCGAACTCTCAGTC

GTGTACTTTACGTGCTTCCTTTCAGGGACCTCCCCCGCGTTACTCAT  
TTGTATTCACAGCTACGAAGTGTCTTGCAAGGTGGATTTCTGCCAGGC  
TCCATGTCTCACTCGTTGCGTTTTTCGGAAAAGTTCATTGTGAACGTTCC  
CCCTTGCGTGTCATGACTTTATCANGTTTCCCAATGTGGTGCT

>TgCatJpTy1/k-3

CCCGATATTCGACAAACGACCAGGAAGAAAGCATTCTCCAGGACATCAT  
CACGAGGTAATCCTTCAACCGAAGTTTGCTTTCCGTGACTCTGCCTGT  
TGGTTATACTGCGTGGCCTTCCCGTCCTGCGGCCCCCTTTCCTCCGC  
TTGCTGTTTAAATGCTCGTCCTCGTTTTTCCCTTCTGCCGCATCCCCGT  
ATATTTTAAGGAGAGGGAAACAGGCGTGAGTTGGACGGCATGAAAGTT  
CTCGGCCTGTATGCCGGTTGTGGCGGTCGTTTGCAGATTGCTTTTTT  
CTTCGAATCGGTGCTGTAACCCTCG<sub>n</sub>CGAAGAACGACGCTGCAAACGA  
CTTCTCGAACTCTCAGTCGTGTACTTTACGTGCTTCCTTTCAGGGACC  
TCCCCCGCGTTACTCATTGTATTACAGCTACGAAGTGTCTTGCAA  
GGTGGATTTCTGCCAGGCTCCATGTCTCACTCGTTGCGTTTTTCGGAA  
AAGTTCATTGTGAACGTTCCCCTTGCGTGTCATGACTTTATCAGGTTT  
CCCAATGTGGTGCTCATGAAGCAGACGGCTC

>TgCatJpGi1/TaJ

GCAAACGACCAGGAAGAAAGCATTCTCCAGGACATCATCACGAGGTAA  
TCCTTCAACCGAAGTTTGCTTTCCGTGACTCTGCCTGTTGGTTATACT  
GCGTGGCCTTCCCGTCCTGCGGCCCCCTTTCCTCCGCTTGCTGTTTA  
AATGCTCGTCCTCGTTTTTCCCTTCCCTGCCGCATCCCCGTATATTTAAG  
GAGAGGGAAACAGGCGTGAGTTGGACGGCATGAAAGTTCTCGGCCTG  
TATGCCGGTTGTGGCGGTCGTTTGCAGATTGCTTTTTTCTTCGAATC  
GGTGCTGTAACCCTCGCGAAGAACGACGCTGCAAACGACTTCTCGAAC  
TCTCAGTCGTGTACTTTACGTGCTTCCTTTCAGGGACCTCCCCCGCG  
TTACTCATTGTATTACAGCTACGAAGTGTCTTGCAAGGTGGATTTCC  
TGCCAGGCTCCATGTCTCACTCGTTGCGTTTTTCGGAAAAGTTCATTGT  
GAACGTTCCCCTTGCGTGTCATGACTTTATCAG

>TgGoatJpOk1

CAGGAAGAAAGCATTCTCCAGGACATCATCACGAGGTAATCCTTCAACC  
GAAGTTTGCTTTCCGTGACTCTGCCTGTTGGTTATACTGCGTGGCCTT  
CCCGTCCTGCGGCCCCCTTTCCTCCGCTTGCTGTTTAAATGCTCGTCC

TCGTTTTCTTCCTGCCGCATCCCCGTATATTTTAAGGAGAGGGAAAC  
AGGCGTGAGTTGGACGGCATGAAAGTTCTCGGCCTGTATGCCGGTTG  
TGGCGGTCGTTTGCAGATTGCTTTTTTCTTCGAATCGGTGCTGTAAC  
CCTCGGAAGAACGACGCTGCAAACGACTTCTCGAACTCTCAGTCGTG  
TACTTTACGTGCTTCCTTTCAGGGACCTCCCCCGCGTTACTCATTG  
TATTCACAGCTACGAAGTGTCTTGCAAGGTGGATTTCTGCCAGGCTCC  
ATGTCTCACTCGTTGCGTTTTTCGGAAAAGTTCATTGTGAACGTTCCCC  
TTGCGTGTCATGACTTTATCAGGTTTCCCAATGTGGTGCTCAT

>TgGoatJpOk2

CACGACCAGGAAGAAAGCATTCTCCAGGACATCATCACGAGGTAATCC  
TTCAACCGAAGTTTGCTTTCCGTGACTCTGCCTGTTGGTTATACTGCG  
TGGCCTTCCCGTCCTGCGGCCCCCTTTCCTCCGCTTGCTGTTAAAT  
GCTCGTCCTCGTTTTCTTCCTGCCGCATCCCCGTATATTTTAAGGAG  
AGGGAAACAGGCGTGAGTTGGACGGCATGAAAGTTCTCGGCCTGTAT  
GCCGGTTGTGGCGGTCGTTTGCAGATTGCTTTTTTCTTCGAATCGGT  
GCTGTAACCCTCGCGAAGAACGACGCTGCAAACGACTTCTCGAACTCT  
CAGTCGTGTACTTTACGTGCTTCCTTTCAGGGACCTCCCCCGCGTTA  
CTCATTGTATTACAGCTACGAAGTGTCTTGCAAGGTGGATTTCTGC  
CAGGCTCCATGTCTCACTCGTTGCGTTTTTCGGAAAAGTTCATTGTGAA  
CGTTCCCCTTGCGTGTCATGACTTTATCAGGTTTCCCAATGTGGTGCT  
C

>TgGoatJpOk3

ACGACCAGGAAGAAAGCATTCTCCAGGACATCATCACGA<sub>g</sub>GTAATCCTT  
CaACCGAAGTTTGCTTTCCGTGACTCTGCCTGTTGGTTATACTGCGTG  
GCCTTCCCGTCCTGCGGCCCCCTTTCCTCCGCTTGCTGTTAAATGCT  
CGTCCTCGTTTTCTTCCTGCCGCATCCCCGTATATTTTAAGGAGAGG  
GAAACAGGCGTGAGTTGGACGGCATGAAAGTTCTCGGCCTGTATGCC  
GGTTGTGGCGGTCGTTTGCAGATTGCTTTTTTCTTCGAATCGGTGCT  
GTAACCCTCGCGAAGAACGACGCTGCAAACGACTTCTCGAACTCTCAG  
TCGTGTACTTTACGTGCTTCCTTTCAGGGACCTCCCCCGCGTTACTC  
ATTTGTATTACAGCTACGAAGTGTCTTGCAAGGTGGATTTCTGCCAG  
GCTCCATGTCTCACTCGTTGCGTTTTTCGGAAAAGTTCATTGTGAACGT  
TCCCCTTGCGTGTCATGACTTTATCAGGTTTCCCAATGTGGTGCTCAT  
G

>TgGoatJpOk4

CACGAGGTAATCCTTCAACCGAAGTTTGCTTTCCGTGACTCTGCCTGT  
TGGTTATACTGCGTGGCCTTCCCGTCCTGCGGCCCCCTTTCCTCCGC  
TTGCTGTTTAAATGCTCGTCCTCGTTTTTCCTTCTGCCGCATCCCCGT  
ATATTTTAAGGAGAGGGAAACAGGCGTGAGTTGGACGGCATGAAAGTT  
CTCGGCCTGTATGCCGGTTGTGGCGGTCGTTTGCAGATTGCTTTTTT  
CTTCGAATCGGTGCTGTAACCCTCGCGAAGAACGACGCTGCAAACGAC  
TTCTCGAACTCTCAGTCGTGTACTTTACGTGCTTCCTTTCAGGGACCT  
CCCCCGCGTTACTCATTTGTATTACAGCTACgAAGTGTCTTGCAAGG  
TGGATTTCTGCCAGGCTCCATGTCTCACTCGTTGCGTTTTTCGGAAAAG  
TTCATTGTGAACGTTCCCCTTGCGTGTCATGACTTTATCAGGTTTCCC  
AATGTGGTGCTCATGAAGCAGACGGCTCT

>TgGoatJpOk5

GACCAGGAAGAAAGCATTCTCCAGGACATCATCACGAGGTAATCCTTC  
AACCGAAGTTTGCTTTCCGTGACTCTGCCTGTTGGTTATACTGCGTGG  
CCTTCCCGTCCTGCGGCCCCCTTTCCTCCGCTTGCTGTTTAAATGCTC  
GTCCTCGTTTTTCCTTCTGCCGCATCCCCGTATATTTAAGGAGAGGG  
AAACAGGCGTGAGTTGGACGGCATGAAAGTTCTCGGCCTGTATGCCG  
GTTGTGGCGGTCGTTTGCAGATTGCTTTTTTCTTCGAATCGGTGCTG  
TAACCCTCGCGAAGAACGACGCTGCAAACGACTTCTCGAACTCTCAGT  
CGTGTACTTTACGTGCTTCCTTTCAGGGACCTCCCCCGCGTTACTCA  
TTTGTATTACAGCTACGAAGTGTCTTGCAAGGTGGATTTCTGCCAGG  
CTCCATGTCTCACTCGTTGCGTTTTTCGGAAAAGTTCATTGTGAACGTT  
CCCCTTGCGTGTCATGACTTTATCAGGTTTCCCAATGTGGTGCTCA

>TgGoatJpOk6

CGACCAGGAAGAAAGCATTCTCCAGGACATCATCACGAGGTAATCCTT  
CaACCGAAGTTTGCTTTCCGTGACTCTGCCTGTTGGTTATACTGCGTG  
GCCTTCCCGTCCTGCGGCCCCCTTTCCTCCGCTTGCTGTTTAAATGCT  
CGTCCTCGTTTTTCCTTCTGCCGCATCCCCGTATATTTAAGGAGAGG  
GAAACAGGCGTGAGTTGGACGGCATGAAAGTTCTCGGCCTGTATGCC  
GGTTGTGGCGGTCGTTTGCAGATTGCTTTTTTCTTCGAATCGGTGCT  
GTAACCCTCGCGAAGAACGACGCTGCAAACGACTTCTCGAACTCTCAG  
TCGTGTACTTTACGTGCTTCCTTTCAGGGACCTCCCCCGCGTTACTC



ATTTGTATTCACAGCTACGAAGTGTCTTGCAAGGTGGATTTCTGCCAG  
GCTCCATGTCTCACTCGTTGCGTTTTTCGGAAAAGTTCATTGTGAACGT  
TCCCCTTGCGTGTCATGACTTTATCAGGTTTCCCAATGTGGTGCTCAT  
GAA

>TgGoatJpOk7

CAGGAAGAAAGCATTCTCCAGGACATCATCaCGAGGTAATCCTTCAaCC  
GAAGTTTGCTTTCCGTGACTCTGCCTGTTGGTTATACTGCGTGGCCTT  
CCCGTCCTGCGGCCCCCTTTCCTCCGCTTGCTGTTTAAATGCTCGTCC  
TCGTTTTTCCTTCCTGCCGCATCCCCGTATATTTTAAGGAGAGGGAAAC  
AGGCGTGAGTTGGACGGCATGAAAGTTCTCGGCCTGTATGCCGGTTG  
TGGCGGTTCGTTTGCAGATTGCTTTTTTTCTTCGAATCGGTGCTGTAAC  
CCTCGCGAAGAACGACGCTGCAAACGACTTCTCGAACTCTCAGTCGTG  
TACTTTACGTGCTTCCTTTCAGGGACCTCCCCCGCGTTACTCATTTG  
TATTCACAGCTACGAAGTGTCTTGCAAGGTGGATTTCTGCCAGGCTCC  
ATGTCTCACTCGTTGCGTTTTTCGGAAAAGTTCATTGTGAACGTTCCCC  
TTGCGTGTCATGACTTTATCAGGTTTCCCAATGTGGTGCTCATGAAGC  
AGACGGCTC

>TgGoatJpOk8

GACCAGGAAGAAAGCATTCTCCAGGACATCATCACGAGGTAATCCTTC  
AACCGAAGTTTGCTTTCCGTGACTCTGCCTGTTGGTTATACTGCGTGG  
CCTTCCCGTCCTGCGGCCCCCTTTCCTCCGCTTGCTGTTTAAATGCTC  
GTCCTCGTTTTTCCTTCCTGCCGCATCCCCGTATATTTTAAGGAGAGGG  
AAACAGGCGTGAGTTGGACGGCATGAAAGTTCTCGGCCTGTATGCCG  
GTTGTGGCGGTTCGTTTGCAGATTGCTTTTTTTCTTCGAATCGGTGCTG  
TAACCCTCGCGAAGAACGACGCTGCAAACGACTTCTCGAACTCTCAGT  
CGTGTACTTTACGTGCTTCCTTTCAGGGACCTCCCCCGCGTTACTCA  
TTTGTATTCACAGCTACGAAGTGTCTTGCAAGGTGGATTTCTGCCAGG  
CTCCATGTCTCACTCGTTGCGTTTTTCGGAAAAGTTCATTGTGAACGTT  
CCCCTTGCGTGTCATGACTTTATCAGGTTTCCCAATGTGGTGCTCAT

>TgGoatJpOk9

AACGACCAGGAAGAAAGCATTCTCCAGGACATCATCACGAGGTAATCC  
TTCaACCGAAGTTTGCTTTCCGTGACTCTGCCTGTTGGTTATACTGCG  
TGGCCTTCCCGTCCTGCGGCCCCCTTTCCTCCGCTTGCTGTTTAAAT

GCTCGTCCTCGTTTTCTTCCTGCCGCATCCCCGTATATTTTAAGGAG  
AGGGAAACAGGCGTGAGTTGGACGGCATGAAAGTTCTCGGCCTGTAT  
GCCGGTTGTGGCGGTCGTTTGCAGATTGCTTTTTTCTTCGAATCGGT  
GCTGTAACCCTCGCGAAGAACGACGCTGCAAACGACTTCTCGAACTCT  
CAGTCGTGTACTTTACGTGCTTCCTTTCAGGGACCTCCCCCGCGTTA  
CTCATTTGTATTACAGCTACGAAGTGTCTTGCAAGGTGGATTTCTGC  
CAGGCTCCATGTCTCACTCGTTGCGTTTTTCGGAAAAGTTCATTGTGAA  
CGTTCCCCTTGCGTGTCATGACTTTATCAGGTTTCCCAATGTGGTGCT  
CATGAAGCA

>TgGoatJpOk10

AAACGACCAGGAAGAAAGCATTCTCCAGGACATCATCACGAGGTAATCC  
TTCAACCGAAGTTTGCTTTCCGTGACTCTGCCTGTTGGTTATACTGCG  
TGGCCTTCCCGTCCTGCGGCCCCCTTTCCTCCGCTTGCTGTTTAAAT  
GCTCGTCCTCGTTTTCTTCCTGCCGCATCCCCGTATATTTTAAGGAG  
AGGGAAACAGGCGTGAGTTGGACGGCATGAAAGTTCTCGGCCTGTAT  
GCCGGTTGTGGCGGTCGTTTGCAGATTGCTTTTTTCTTCGAATCGGT  
GCTGTAACCCTCGCGAAGAACGACGCTGCAAACGACTTCTCGAACTCT  
CAGTCGTGTACTTTACGTGCTTCCTTTCAGGGACCTCCCCCGCGTTA  
CTCATTTGTATTACAGCTACGAAGTGTCTTGCAAGGTGGATTTCTGC  
CAGGCTCCATGTCTCACTCGTTGCGTTTTTCGGAAAAGTTCATTGTGAA  
CGTTCCCCTTGCGTGTCATGACTTTATCAGGTTTCCCAATGTGGTGCT  
CAT

>TgGoatJpOk11

CGACCAGGAAGAAAGCATTCTCCAGGACATCATCACGAGGTAATCCTT  
CAACCGAAGTTTGCTTTCCGTGACTCTGCCTGTTGGTTATACTGCGTG  
GCCTTCCCGTCCTGCGGCCCCCTTTCCTCCGCTTGCTGTTTAAATGCT  
CGTCCTCGTTTTCTTCCTGCCGCATCCCCGTATATTTTAAGGAGAGG  
GAAACAGGCGTGAGTTGGACGGCATGAAAGTTCTCGGCCTGTATGCC  
GGTTGTGGCGGTCGTTTGCAGATTGCTTTTTTCTTCGAATCGGTGCT  
GTAACCCTCGCGAAGAACGACGCTGCAAACGACTTCTCGAACTCTCAG  
TCGTGTACTTTACGTGCTTCCTTTCAGGGACCTCCCCCGCGTTACTC  
ATTTGTATTACAGCTACGAAGTGTCTTGCAAGGTGGATTTCTGCCAG  
GCTCCATGTCTCACTCGTTGCGTTTTTCGGAAAAGTTCATTGTGAACGT  
TCCCCTTGCGTGTCATGACTTTATCAGGTTTCCCAATGTGGTGCTCAT



Uracil phosphoribosyl transferase intron 7 (UPRT7)

>GT1

GTAAGAAATAACGCTTTGAAGGTCGTTGGCTTGTATTACCGTCACTAC  
TGCGACGACATACTGGAGAACTCGAGCATCCTTTATGGGTTGGTGTG  
ATGAACGTAGGACTACCAGATGTCATTTCTTCATTGGAACACTTTATTG  
TACACGCATGCCGTTTATGCGCTGCTTATCCGAGGGTGGCATCACAGG  
GACCCTACAAGAAGCTGACGGGGCACCTCCACTATGAAGTGACATGCC  
AATGCACGCCAGGTTGCATGTTCCAAGTGTCTGGTATCTTTGGCTAC  
GCTGTCTTTTACTAATCGCAAGAAACAGTGCTCGTCATGGGTGGTAAC  
TCCTTGGTGCCACCAGAACGCATGTGGTGCGTTTGTGTTCCGCTTT  
GTTTTCTTGGGAGATTTGCGCTGCGGCCTAATGCAGCCAGCCCTTTATG  
GAATTGTGTGCCCTGCTGTCTTGTCAG

>ME49

TCTTGTTTGCTTTCCTCGGCGGTCTGCAGTGTTGACATCTGCCTGAA  
CTCGAGGTACTACATCGTCCCCGGCATTGGTGATTTCCGGTGACCGGTA  
AGAAATAACGCTTTGAAGGTCGTTGGCTTGTATTACCGTCACTACTGC  
GACGACATACTGGAGAACTCGAGCATCCTTTATGGGTTTGTGTTGATG  
AACGTAGGACTACCAGATATCATTCTTCATTGGAACACTTTATTGTAC  
ACGCATGCCGTTTATGCGCTGCTTATCCGAGGGTGGCATCACAGGGAC  
CCTACAAGAAGCTGACGGGGCACCTCCACTATGAAGTGACATGCCAAT  
GCATGCCAGGTTGCATGTTCCAAGTGTCTGGTATCTTTGGCTACGCT  
GTCTTTTACTAATCGCAAGAAACAGTGCTCGTCATGGGTGGTAACTCC  
TTGGTGCCACCAGAACGCATGTGGTGCGTTTGTGTTCCGCTTTGTT  
TTCTTGGGAGATTTGCGCTGCGGCCTAATGCAGCCAACCCTTTATGGAA  
TTGTGTGCCCTGCTGTCTTGTCAGGTACTTTGGAACCATGTAGGTCTC  
TAGTTTTTTTTGACAGACCGCTGACGG

>VEG

GTAAGAAATAACGCTTTGAAGGTCGTTGGCTTGTATTACCGTCACTAC  
TGCGACGACATACTGGAGAACTCGAGCATCCTTTATGGGTTTGTGTTG  
ATGAACGTAGGACTACCAGATATCATTCTTCATTGGAACACTTTATTG  
TACACGCATGCCGTTTATGCGCTGCTTATCCGAGGGTGGCATCACAGG  
GACCCTACAAGAAGCTGACGGGGCACCTCCACTATGAAGTGACATGCC  
AATGCATGCCAGGTTGCATGTTCCAAGTGTCTGGTATCTTTGGCTAC

GCTGTCTTTTACTAATCGCAAGAAACAGTGCTCGTCATGGGTGGTAAC  
TCCTTGGTGCCACCAGAACGCATGTGGTGCCTTTGTTGTTCCGCTTT  
GTTTTCTTGGGAGATTTGCTGCGGCCTAATGCAGCCAACCCTTTATG  
GAATTGTGTGCCCTGCTGTCTTGTCAG

>MAS

GTAAGAAATAACGCTTTGAAGGTCGTTGGCTTGTATTACCGTCACTAC  
TGCGACGACATACTGGAGAACTCGAGCATCCTTTATGGGTTTGTGTTG  
ATGAACGTAGGACTACCAGATGTCATTTCTTCATTGGAACACTTTATTG  
TACACGCATGCCGTTTATGCGCTGCTTATCCGAGGGTGGCATCACAGG  
GACCCTACAAGAAGCTGACGGGGCACCTCCACTATGAAGTGACATGCC  
AATGCATGCCCAGGTTGCATGTTCCAAGTGTCTGGTATCTTTGGCTAC  
GCTGTCTTTTACTAATCGCAAGAAGCAGTGCTCGTCATGGATGGTAAC  
TCCTTGGTGCCACCAGAACGCATGTGGTGCCTTTGTTGTTCCGCTTT  
GTTTTCTTGGGAGATTTGCTGCGGCCTAATGCAGCCAGCCCTTTATG  
GAATTGTGTGCCCTGCTGTCTTGTCAG

>RUB

GTAAGAAATAACGCTTTGAAGGTCGTTGGCTTGTATTATCGTCACTAC  
TGCGACGACATACTGGAGAACTCGAGCATCCTTTATGGGTTTGTGTTG  
ATGAACGTAGGACTAACAGATGTCATTTCTTCATTGGAACACTTTATTG  
TACACGCATGCCGTTTATGCGCTGCTTATCCGAGGGTGGCATCACAGG  
GACCCTACAAGAAGCTGACGGGGCACCTCCACTATGAAGTGACATGCC  
AATTCATGCCCAGGTTGCATGTTCCAAGTGTCTGGTATCTTTGGCTAC  
GCTGTCTTTTACTAATCGCAAGAAACAGTGCTCGTCATGGGTGGTAAC  
TCCTTGGTGCCACCAGAACGCATGTGGTGCCTTTGTTGTTCCGCTTT  
GTTTTCTTGGGAGATTTGCTGCGGCCTAATGCAGCCAGCCCTTTATG  
GAATTGTGTGCCCTGTTGTCTTGTCAG

>FOU

GTAAGAAATAACGCTTTGAAGGTCGTTGGCTTGTATTACCGTCACTAC  
TGCGACGACATACTGGAGAACTCGAGCATCCTTTATGGGTTTGTGTTG  
ATGAACGTAGGACTACCAGATGTCATTTCTTCATTGGAACACTTTATTG  
TACACGCATGCCGTTTATGCGCTGCTTATCCGAGGGTGGCATCACAGG  
GACCCTACAAGAAGCTGACGGGGCACCTCCACTATGAAGTGACATGCC  
AATGCATGCCCAGGTTGCATGTTCCAAGTGTCTGGTATCTTTGGCTAC

GCTGTCTTTTACTAATCGCAAGAAACAGTGCTCGTCATGGGTGGTAAC  
TCCTTGGTGCCACCAGAACGCATGTGGTGCGTTTGTGTTCCGCTTT  
GTTTTCTTGGGAGATTTGCTGCGGCCTAATGCAGCCAGCCCTTTATG  
GAATTGTGTGCCCTGCTGTCTTGTCAG

>CAST

GTAAGAAATAACGCTTTGAAGGTCGTTGGCTTGTATTACCGTCACTAC  
TGCGACGACATACTGGAGAACTCGAGCATCCTTTATGGGTTTGTGTTG  
ATGAACGTAGGACTAACAGATGTCATTTCTTCATTGGAACACTTTATTG  
TACACGCATGCCGTTTATGCGCTGCTTATCCGAGGGTGGCATCACAGG  
GACCCTACAAGAACCTGACGGGGCACCTCCACTATGAAGTGACATGCC  
AATGCATGCCCAGGTTGCATGTTCCAAGTGTCTGGTATCTTTGGCTAC  
GCTGTCTTTTACTAATCGCAAGAAACAGTGCTCGTCATGGGTGGTAAC  
TCCTTGGTGCCACCAGAACACATGTGGCGCGTTTGTGTTCCGCTTT  
GTTTTCTTGGGAGATTTGCTGCGGCCTAATGCAGCCAACCCTTTATG  
GAATTGTGTGCCATGCTGTCTTGTCAG

>TgCatBr5

GTAAGAAATAACGCTTTGAAGGTCGTTGGCTTGTATTACCGTCACTAC  
TGCGACGACATACTGGAGAACTCGAGCATCCTTTATGGGTTTGTGTTG  
ATGAACGTAGGACTACCAGATGTCATTTCTTCATTGGAACACTTTATTG  
TACACGCATGCCGTTTATGCGCTGCTTATCCGAGGGTGGCATCACAGG  
GACCCTACAAGAAGCTGACGGGGCACCTCCACTATGAAGTGACATGCC  
AATGCATGCCCAGGTTGCATGTTCCAAGTGTCTGGTATCTTTGGCTAC  
GCTGTCTTTTACTAATCGCAAGAAGCAGTGCTCGTCATGGATGGTAAC  
TCCTTGGTGCCACCAGAACGCATGTGGTGCGTTTGTGTTCCGCTTT  
GTTTTCTTGGGAGATTTGCTGCGGCCTAATGCAGCCAGCCCTTTATG  
GAATTGTGTGCCCTGCTGTCTTGTCAG

>p89

GTAAGAAATAACGCTTTGAAGGTCGTTGGCTTGTATTACCGTCACTAC  
TGCGACGACATACTGGAGAACTCGAGCATCCTTTATGGGTTTGTGTTG  
ATGAACGTAGGACTAACAGATGTCATTTCTTCATTGGAACACTTTATTG  
TACACGCATGCCGTTTATGCGCTGCTTATCCGAGGGTGGCATCACAGG  
GACCCTACAAGAAGCTGACGGGGCACCTCCACTATGAAGTGACATGCC  
AATGCACGCCCAGGTTGCATGTTCCAAGTGTCTGGTATCTTTGGCTAC

GCTGTCTTTTACTAATCGCAAGAAACAGTGCTCGTCATGGGTGGTAAC  
TCCTTGGTGCCACCAGAACGCATGTGGCGCGTTTGTGTTCCGCTTT  
GTTTTCTTGGGAGATTTGCTGCGGCCTAATGCAGCCAGCCCTTTATG  
GAATTGTGTGCCCTGCTGTCTTGTCAG

>VAND

GTAAGAAATAACGCTTTGAAGGTCGTTGGCTTGTATTACCGTCACTAC  
TGCGACGACATACTGGAGAACTCGAGCATCCTTTATGGGTTTGTGTTG  
ATGAACGTAGGACTAACAGATGTCATTTCTTCATTGGAACACTTTATTG  
TACACGCATGCCGTTTATGCGCTGCTTATCCGAGGGTGGCATCACAGG  
GACCCTACAAGAAGCTGACGGGGCACCTCCACTATGAAGTGACATGCC  
AATGCATGCCCAGGTTGCATGTTCCAAGTGTCTGGTATCTTTGGCTAC  
GCTGTCTTTTACTAATCGCAAGAAACAGTGCTCGTCATGGGTGGTAAC  
TCCTTGGTGCCACCAGAACGCATGTGGTGCCTTTGTGTTCCGCTTT  
GTTTTCTTGGGAGATTTGCTGCGGCCTAATGCAGCCAGCCCTTTATG  
GAATTGTGTGCCCTGCTGTCTTGTCAG

>TgCgCa1

GTAAGAAATAACGCTTTGAAGGTCGTTGGCTTGTATTACCGTCACTAC  
TGCGACGACATACTGGAGAACTCGAGCATCCTTTATGGGTTTGTGTTG  
ATGAACGTAGGACTACCAGATGTCATTTCTTCATTGGAACACTTTATTG  
TACACGCATGCCGTTTATGCGCTGCTTATCCGAGGGTGGCATCACAGG  
GACCCTACAAGAAGCTGACGGGGCACCTCCACTATGAAGTGACATGCC  
AATGCATGCCCAGGTTGCATGTTCCAAGTGTCTGGTATCTTTGGCTAC  
GCTGTCTTTTACTAATCGCAAGAAACAGTGCTTGTTCATGGGTGGTAAC  
TCCTTGGTGCCACCAGAACGCATGTGGTGCCTTTGTGTTCCGCTTT  
GTTTTCTTGGGAGATTTGCTGCGGCCTAATGCAGCCAACCCTTTATG  
GAATTGTGTGCCCTGCTGTCTTGTCAG

>ARI

GTAAGAAATAACGCTTTGAAGGTCGTTGGCTTGTATTACCGTCACTAC  
TGCGACGACATACTGGAGAACTCGAGCATCCTTTATGGGTTTGTGTTG  
ATGAACGTAGGACTACCAGATATCATTCTTCATTGGAACACTTTATTG  
TACACGCATGCCGTTTATGCGCTGCTTATCCGAGGGTGGCATCACAGG  
GACCCTACAAGAAGCTGACGGGGCACCTCCACTATGAAGTGACATGCC  
AATGCATGCCCAGGTTGCATGTTCCAAGTGTCTGGTATCTTTGGCTAC

GCTGTCTTTTACTAATCGCAAGAAACAGTGCTCGTCATGGGTGGTAAC  
TCCTTGGTGCCACCAGAACGCATGTGGTGCCTTTGTTGTTCCGCTTT  
GTTTTCTTGGGAGATTTGCTGCGGCCTAATGCAGCCAACCCTTTATG  
GAATTGTGTGCCCTGCTGTCTTGTCAG

>TgCtPRC2

GTAAGAAATAACGCTTTGAAGGTCGTTGGCTTGTATTATCGTCACTAC  
TGCGACGACATACTGGAGAACTCGAGCATCCTTTATGGGTTTGTGTTG  
ATGAACGTAGGACTAACAGATGTCATTTCTTCATTGGAACACTTTATTG  
TACACGCATGCCGTTTATGCGCTGCTTATCCGAGGGTGGCATCACAGG  
GACCCTACAAGAAGCTGACGGGGCACCTCCACTATGAAGTGACATGCC  
AATTCATGCCCAGGTTGCATGTTCCAAGTGTCTGGTATCTTTGGCTAC  
GCTGTCTTTTACTAATCGCAAGAAACAGTGCTCGTCATGGGTGGTAAC  
TCCTTGGTGCCACCAGAACGCATGTGGTGCCTTTGTTGTTCCGCTTT  
GTTTTCTTGGGAGATTTGCTGCGGCCTAATGCAGCCAGCCCTTTATG  
GAATTGTGTGCCCTGCTGTCTTGTCAG

>GAB2-2007-GAL-DOM2

GTAAGAAATAACGCTTTGAAGGTCGTTGGCTTGTATTACCGTCACTAC  
TGCGACGACATACTGGAGAACTCGAGCATCCTTTATGGGTTTGTGTTG  
ATGAACGTAGGACTACCAGATGTCATTTCTTCATTGGAACACTTTATTG  
TACACGCATGCCGTTTATGCGCTGCTTATCCGAGGGTGGCATCACAGG  
GACCCTACAAGAAGCTGACGGGGCACCTCCACTATGAAGTGACATGCC  
AATGCATGCCCAGGTTGCATGTTCCAAGTGTCTGGTATCTTTGGCTAC  
GCTGTCTTTTACTAATCGCAAGAAACAGTGCTCGTCATGGGTGGTAAC  
TCCTTGGTGCCACCAGAACGCATGTGGTGCCTTTGTTGTTCCGCTTT  
GTTTTCTTGGGAGATTTGCTGCGGCCTAATGCAGCCAGCCCTTTATG  
GAATTGTGTGCCCTGCTGTCTTGTCAG

>TgCtCo5

GTAAGAAATAACGCTTTGAAGGTCGTTGGCTTGTATTACCGTCACTAC  
TGCGACGACATACTGGAGAACTCGAGCATCCTTTATGGGTTTGTGTTG  
ATGAACGTAGGACTAACAGATGTCATTTCTTCATTGGAACACTTTATTG  
TACACGCATGCCGTTTATGCGCTGCTTATCCGAGGGTGGCATCACAGG  
GACCCTACAAGAAGCTGACGGGGCACCTCCACTATGAAGTGACATGCC  
AATGCATGCCCAGGTTGCATGTTCCAAGTGTCTGGTATCTTTGGCTAC



GCTGTCTTTTACTAATCGCAAGAAACAGTGCTCGTCATGGGTGGTAAC  
TCCTTGGTGCCACCAGAACGCATGTGGTGCCTTTGTTGTTCCGCTTT  
GTTTTCTTGGGAGATTTTCGCTGCGGCCTAATGCAGCCAGCCCTTTATG  
GAATTGTGTGCCCTGCTGTCTTGTCAG

>TgCatJpOk1

TCTGCAGTGTTGACATCTGCCTGAACTCGAGGTACTACATCGTCCCCG  
GCATTGGTGATTTTCGGTGACCGGTAAGAAATAACGCTTTGAAGGTTCGT  
TGGCTTGTATTACCGTCACTACTGCGACGACATACTGGAGAACTCGAG  
CATCCTTTATGGGTTTGTGTTGATGAACGTAGGACTACCAGATATCAT  
TTCTTCATTGGAACACTTTATTGTACACGCATGCCGTTTATGCGCTGC  
TTATCCGAGGGTGGCATCACAGGGACCCTACAAGAAGCTGACGGGGCA  
CCTCCACTATGAAGTGACATGCCAATGCATGCCCAGGTTGCATGTTCC  
AAGTGTCTGGTATCTTTGGCTACGCTGTCTTTTACTAATCGCAAGAAA  
CAGTGCTCGTCATGGGTGGTAACTCCTTGGTGCCACCAGAACGCATGT  
GGTGCCTTTGTTGTTCCGCTTTGTTTTCTTGGGAGATTTTCGCTGCGG  
CCTAATGCAGCCAACCCTTTATGGAATTGTGTGCCCTGCTGTCTTGTC  
AGGTACTTTGGAACCATGTAGGTCTCTAGTTTTTT

>TgCatJpOk2

CTTTCCTCGGCGGTCTGCAGTGTTGACATCTGCCTGAACTCGAGGTAC  
TACATCGTCCCCGGCATTGGTGATTTTCGGTGACCGGTAAGAAATAACG  
CTTTGAAGGTTCGTTGGCTTGTATTACCGTCACTACTGCGACGACATAC  
TGGAGAACTCGAGCATCCTTTATGGGTTTGTGTTGATGAACGTAGGAC  
TACCAGATATCATTTCTTCATTGGAACACTTTATTGTACACGCATGCCG  
TTTATGCGCTGCTTATCCGAGGGTGGCATCACAGGGACCCTACAAGAA  
GCTGACGGGGCACCTCCACTATGAAGTGACATGCCAATGCATGCCCAG  
GTTGCATGTTCCAAGTGTCTGGTATCTTTGGCTACGCTGTCTTTTACT  
AATCGCAAGAAACAGTGCTCGTCATGGGTGGTAACTCCTTGGTGCCAC  
CAGAACGCATGTGGTGCGTTTGTGTTCCGCTTTGTTTTCTTGGGAG  
ATTTTCGCTGCGGCCTAATGCAGCCAACCCTTTATGGAATTGTGTGCC  
TGCTGTCTTGTGAGGTACTTTGGAACCATGTAGGTCTCTAGTTTTTTTT  
GACAGACCGCTGACGGAATCGCGGACTGGAAGAAGCACGCCTCAAGA  
GGATAAACACCATTTTTTATTTTTGTCTCGCTCCCACGTCCCTCACCATC  
GGCAGGAACACAGAAAAAAGTTTTAGTTGTGAGGCTGCCTGGTGCG  
CGACAAGCAGTTGCGCTTTTTTGTGCCACGGGGTATATCT

>TgCatJpOk3

TTTCTGCCTCTTGTTTGCTTTCCTCGGCGGTCTGCAGTGTTGACATC  
TGCCTGAACTCGAGGTACTACATCGTCCCCGGCATTGGTGATTTCCGGT  
GACCGGTAAGAAATAACGCTTTGAAGGTCGTTGGCTTGTATTACCGTC  
ACTACTGCGACGACATACTGGAGAACTCGAGCATCCTTTATGGGTTTG  
TGTTGATGAACGTAGGACTACCAGATATCATTTCTTCATTGGAACACTT  
TATTGTACACGCATGCCGTTTATGCGCTGCTTATCCGAGGGTGGCATC  
ACAGGGACCCTACAAGAAGCTGACGGGGCACCTCCACTATGAAGTGAC  
ATGCCAATGCATGCCCAGGTTGCATGTTCCAAGTGTCTGGTATCTTTG  
GCTACGCTGTCTTTTACTAATCGCAAGAAACAGTGCTCGTCATGGGTG  
GTAACTCCTTGGTGCCACCAGAACGCATGTGGTGCGTTTGTGTTC  
GCTTTGTTTTCTTGGGAGATTTTCGCTGCGGCCTAATGCAGCCAACCCT  
TTATGGAATTGTGTGCCCTGCTGTCTTGTTCAGGTACTTTGGAACCATG  
TAGGTCTCTAGTTTTTTTTGACAGACCGCTGACGGAATCGCGGACTGGA  
AGAAGCACGCCTCAAGAGGATAAACACCATTTTTTATTTTTGTCTCGCTC  
CCACGTCCCTCACCATCGGCAGGAACACAGAAAAAAGTTTTAGTTGT  
GAGGCTGCCTGGTGCGCGACAAGCAGTTGCGCTTTTTTTGTGCCACGG  
GGTATATCTTTGGTTCGCGCTCCTGTC

>TgCatJpOk4

GGCGGTCTGCAGTGTTGACATCTGCCTGAACTCGAGGTACTACATCGT  
CCCCGGCATTGGTGATTTCCGGTGACCGGTAAGAAATAACGCTTTGAAG  
GTCGTTGGCTTGTATTACCGTCACTACTGCGACGACATACTGGAGAAC  
TCGAGCATCCTTTATGGGTTTGTGTTGATGAACGTAGGACTACCAGAT  
ATCATTTCTTCATTGGAACACTTTATTGTACACGCATGCCGTTTATGCG  
CTGCTTATCCGAGGGTGGCATCACAGGGACCCTACAAGAAGCTGACGG  
GGCACCTCCACTATGAAGTGACATGCCAATGCATGCCCAGGTTGCATG  
TTCCAAGTGTCTGGTATCTTTGGCTACGCTGTCTTTTACTAATCGCAA  
GAAACAGTGCTCGTCATGGGTGGTAACTCCTTGGTGCCACCAGAACGC  
ATGTGGTGCGTTTGTGTTCGCTTTGTTTTCTTGGGAGATTTTCGCT  
GCGGCCTAATGCAGCCAACCCTTTATGGAATTGTGTGCCCTGCTGTCT  
TGTCAGGTACTTTGGAACCATGTAAGTCTCTAGTTTTTTTTG

>TgCatJpTy1/k-3

TCTTGTTTGCTTTCCTCGGCGGTCTGCAGTGTTGACATCTGCCTGAA

CTCGAGGTACTACATCGTCCCCGGCATTGGTGATTTTCGGTGACCGGTA  
AGAAATAACGCTTTGAAGGTCGTTGGCTTGTATTACCGTCACTACTGC  
GACGACATACTGGAGAACTCGAGCATCCTTTATGGGTTTGTGTTGATG  
AACGTAGGACTACCAGATATCATTTCTTCATTGGAACACTTTATTGTAC  
ACGCATGCCGTTTATGCGCTGCTTATCCGAGGGTGGCATCACAGGGAC  
CCTACAAGAAGCTGACGGGGCACCTCCACTATGAAGTGACATGCCAAT  
GCATGCCCAGGTTGCATGTTCCAAGTGTCTGGTATCTTTGGCTACGCT  
GTCTTTTACTAATCGCAAGAAACAGTGCTCGTCATGGGTGGTAACTCC  
TTGGTGCCACCAGAACGCATGTGGTGCGTTTGTGTTCCGCTTTGTT  
TTCTTGGGAGATTTTCGCTGCGGCCTAATGCAGCCAACCCTTTATGGAA  
TTGTGTGCCCTGCTGTCTTGTGAGGTAAGTTTGGAAACCATGTAGGTCTC  
TAGTTTTTTTTGACAGACCGCTGA

>TgCatJpGi1/TaJ

TCCTCGGCGGTCTGCAGTGTTGACATCTGCCTGAACTCGAGGTACTAC  
ATCGTCCCCGGCATTGGTGATTTTCGGTGACCGGTAAGAAATAACGCTT  
TGAAGGTCGTTGGCTTGTATTACCGTCACTACTGCGACGACATACTGG  
AGAACTCGAGCATCCTTTATGGGTTTGTGTTGATGAACGTAGGACTAC  
CAGATATCATTTCTTCATTGGAACACTTTATTGTACACGCATGCCGTTT  
ATGCGCTGCTTATCCGAGGGTGGCATCACAGGGACCCTACAAGAAGCT  
GACGGGGCACCTCCACTATGAAGTGACATGCCAATGCATGCCCAGGTT  
GCATGTTCCAAGTGTCTGGTATCTTTGGCTACGCTGTCTTTTACTAAT  
CGCAAGAAACAGTGCTCGTCATGGGTGGTAACTCCTTGGTGCCACCAG  
AACGCATGTGGTGCGTTTGTGTTCCGCTTTGTTTTCTTGGGAGATT  
TCGCTGCGGCCTAATGCAGCCAACCCTTTATGGAATTGTGTGCCCTGC  
TGTCTGTCAGGTA

>TgGoatJpOk1

TGCAGTGTTGACATCTGCCTGAACTCGAGGTACTACATCGTCCCCCGG  
CATTGGTGATTTTCGGTGACCGGTAAGAAATAACGCTTTGAAGGTCGTT  
GGCTTGTATTACCGTCACTACTGCGACGACATACTGGAGAACTCGAGC  
ATCCTTTATGGGTTTGTGTTGATGAACGTAGGACTACCAGATATCATT  
TCTTCATTGGAACACTTTATTGTACACGCATGCCGTTTATGCGCTGCT  
TATCCGAGGGTGGCATCACAGGGACCCTACAAGAAGCTGACGGGGCAC  
CTCCACTATGAAGTGACATGCCAATGCATGCCCAGGTTGCATGTTCCA  
AGTGTCTGGTATCTTTGGCTACGCTGTCTTTTACTAATCGCAAGAAAC

AGTGCTCGTCATGGGTGGTAACTCCTTGGTGCCACCAGAACGCATGTG  
GTGCGTTTGTGTTCCGCTTTGTTTTCTTGGGAGATTTTCGCTGCGGC  
CTAATGCAGCCAACCCTTTATGGAATTGTGTGCCCTGCTGTCTTGTCAG  
GGTACTTTGGAACCATGTAAGTCTCTAGTTTTTTTT

>TgGoatJpOk2

ATCTGCCTGAACTCGAGGTAACATCGTCCCCGGCATTGGTGATTTC  
GGTGACCGGTAAGAAATAACGCTTTGAAGGTCGTTGGCTTGTATTACC  
GTCACTACTGCGACGACATACTGGAGAACTCGAGCATCCTTTATGGGT  
TTGTGTTGATGAACGTAGGACTACCAGATATCATTTCTTCATTGGAACA  
CTTTATTGTACACGCATGCCGTTTATGCGCTGCTTATCCGAGGGTGGC  
ATCACAGGGACCCTACAAGAAGCTGACGGGGCACCTCCACTATGAAGT  
GACATGCCAATGCATGCCCAGGTTGCATGTTCCAAGTGTCTGGTATCT  
TTGGCTACGCTGTCTTTTACTAATCGCAAGAAACAGTGCTCGTCATGG  
GTGGTAACTCCTTGGTGCCACCAGAACGCATGTGGTGCGTTTGTGTTGT  
TCCGCTTTGTTTTCTTGGGAGATTTTCGCTGCGGCCTAATGCAGCCAAC  
CCTTTATGGAATTGTGTGCCCTGCTGTCTTGTCAG

>TgGoatJpOk3

GTGTTGACATCTGCCTGAACTCGAGGTANTACATCGTCCCCGGCATTG  
GTGATTTCCGGTGACCGGTAAGAAATAACGCTTTGAAGGTCGTTGGCTT  
GTATTACCGTCACTACTGCGACGACATACTGGAGAACTCGAGCATCCTT  
TATGGGTTTGTGTTGATGAACGTAGGACTACCAGATATCATTTCTTCA  
TTGGAACACTTTATTGTACACGCATGCCGTTTATGCGCTGCTTATCCG  
AGGGTGGCATCACAGGGACCCTACAAGAAGCTGACGGGGCACCTCCAC  
TATGAAGTGACATGCCAATGCATGCCCAGGTTGCATGTTCCAAGTGTC  
TGGTATCTTTGGCTACGCTGTCTTTTACTAATCGCAAGAAACAGTGCT  
CGTCATGGGTGGTAACTCCTTGGTGCCACCAGAACGCATGTGGTGCG  
TTTGTGTTCCGCTTTGTTTTCTTGGGAGATTTTCGCTGCGGCCTAAT  
GCAGCCAACCCTTTATGGAATTGTGTGCCCTGCTGTCTTGTCAGG

>TgGoatJpOk4

CTGCCTGAACTCGAGGTAACATCGTCCCCGGCATTGGTGATTTCGG  
TGACCGGTAAGAAATAACGCTTTGAAGGTCGTTGGCTTGTATTACCGT  
CACTACTGCGACGACATACTGGAGAACTCGAGCATCCTTTATGGGTTT  
GTGTTGATGAACGTAGGACTACCAGATATCATTTCTTCATTGGAACACT

TTATTGTACACGCATGCCGTTTATGCGCTGCTTATCCGAGGGTGGCAT  
CACAGGGACCCTACAAGAAGCTGACGGGGCACCTCCACTATGAAGTGA  
CATGCCAATGCATGCCCAGGTTGCATGTTCCAAGTGTCTGGTATCTTT  
GGCTACGCTGTCTTTTACTAATCGCAAGAAACAGTGCTCGTCATGGGT  
GGTAACTCCTTGGTGCCACCAGAACGCATGTGGTGCGTTTGTGTTC  
CGCTTTGTTTTCTTGGGAGATTTTCGCTGCGGCCTAATGCAGCCAACCC  
TTTATGGAATTGTGTGCCCTGCTGTCTTGTTCAGG

>TgGoatJpOk5

TGANTTCGGTGACCGGTAAGAAATAACGCTTTGAAGGTCGTTGGCTT  
GTATTACCGTCACTACTGCGACGACATACTGGAGAACTCGAGCATCCTT  
TATGGGTTTGTGTTGATGAACGTAGGACTACCAGATATCATTTCTTCA  
TTGGAACACTTTATTGTACACGCATGCCGTTTATGCGCTGCTTATCCG  
AGGGTGGCATCACAGGGACCCTACAAGAAGCTGACGGGGCACCTCCAC  
TATGAAGTGACATGCCAATGCATGCCCAGGTTGCATGTTCCAAGTGTC  
TGGTATCTTTGGCTACGCTGTCTTTTACTAATCGCAAGAAACAGTGCT  
CGTCATGGGTGGTAACTCCTTGGTGCCACCAGAACGCATGTGGTGCG  
TTTGTGTTCGCTTTGTTTTCTTGGGAGATTTTCGCTGCGGCCTAAT  
GCAGCCAACCCTTTATGGAATTGTGTGCCCTGCTGTCTTGTTCAGGTAC  
TT

>TgGoatJpOk6

TACATCGTCCCCGGCATTGGTGATTTTCGGTGACCGGTAAGAAATAACG  
CTTTGAAGGTCGTTGGCTTGTATTACCGTCACTACTGCGACGACATAC  
TGGAGAACTCGAGCATCCTTTATGGGTTTGTGTTGATGAACGTAGGAC  
TACCAGATATCATTTCTTCATTGGAACACTTTATTGTACACGCATGCCG  
TTTATGCGCTGCTTATCCGAGGGTGGCATCACAGGGACCCTACAAGAA  
GCTGACGGGGCACCTCCACTATGAAGTGACATGCCAATGCATGCCCAG  
GTTGCATGTTCCAAGTGTCTGGTATCTTTGGCTACGCTGTCTTTTACT  
AATCGCAAGAAACAGTGCTCGTCATGGGTGGTAACTCCTTGGTGCCAC  
CAGAACGCATGTGGTGCGTTTGTGTTCGCTTTGTTTTCTTGGGAG  
ATTTTCGCTGCGGCCTAATGCAGCCAACCCTTTATGGAATTGTGTGCC  
TGCTGTCTTGTTCAGGTACTTTGGAACCATGTANNTCTCTAGTTT

>TgGoatJpOk7

TCTGCCTGAACTCGAGGTAACATCGTCCCCGGCATTGGTGATTTTCG

GTGACCGGTAAGAAATAACGCTTTGAAGGTCGTTGGCTTGTATTACCG  
TCACTACTGCGACGACATACTGGAGAACTCGAGCATCCTTTATGGGTT  
TTGTGTTGATGAACGTAGGACTACCAGATATCATTTCTTCATTGGAACA  
CTTTATTGTACACGCATGCCGTTTATGCGCTGCTTATCCGAGGGTGGC  
ATCACAGGGACCCTACAAGAAGCTGACGGGGCACCTCCACTATGAAGT  
GACATGCCAATGCATGCCAGGTTGCATGTTCCAAGTGTCTGGTATCT  
TTGGCTACGCTGTCTTTTACTAATCGCAAGAAACAGTGCTCGTCATGG  
GTGGTAACTCCTTGGTGCCACCAGAACGCATGTGGTGCGTTTGTGTG  
TCCGCTTTGTTTTCTTGGGAGATTTTCGCTGCGGCCTAATGCAGCCAAC  
CCTTTATGGAATTGTGTGCCCTGCTGTCTTGTTCAGGTACTIONTTGGAACC  
ATG

>TgGoatJpOk8

TTCTTGTGGCTTTCCCTNGNNNGTCTGCAGTGTTGACATCTGCCTGA  
ACTCGAGGTACTACATCGTCCCCGGCATTGGTGATTTTCGGTGACCGGT  
AAGAAATAACGCTTTGAAGGTCGTTGGCTTGTATTACCGTCACTACTG  
CGACGACATACTGGAGAACTCGAGCATCCTTTATGGGTTTGTGTTGAT  
GAACGTAGGACTACCAGATATCATTTCTTCATTGGAACACTTTATTGTA  
CACGCATGCCGTTTATGCGCTGCTTATCCGAGGGTGGCATCACAGGGA  
CCCTACAAGAAGCTGACGGGGCACCTCCACTATGAAGTGACATGCCAA  
TGCATGCCAGGTTGCATGTTCCAAGTGTCTGGTATCTTTGGCTACGC  
TGTCTTTTACTAATCGCAAGAAACAGTGCTCGTCATGGGTGGTAACTC  
CTTGGTGCCACCAGAACGCATGTGGTGCGTTTGTGTGTTCCGCTTTGT  
TTTCTTGGGAGATTTTCGCTGCGGCCTAATGCAGCCAACCCTTTATGGA  
ATTGTGTGCCCTGCTGTCTTGTTCAGG

>TgGoatJpOk9

TTNCAGTGTTGACATCTGCCTGAACTCGAGGTACTACATCGTCCCCGG  
CATTGGTGATTTTCGGTGACCGGTAAGAAATAACGCTTTGAAGGTCGTT  
GGCTTGTATTACCGTCACTACTGCGACGACATACTGGAGAACTCGAGC  
ATCCTTTATGGGTTTGTGTTGATGAACGTAGGACTACCAGATATCATT  
TCTTCATTGGAACACTTTATTGTACACGCATGCCGTTTATGCGCTGCT  
TATCCGAGGGTGGCATCACAGGGACCCTACAAGAAGCTGACGGGGCAC  
CTCCACTATGAAGTGACATGCCAATGCATGCCAGGTTGCATGTTCCA  
AGTGTCTGGTATCTTTGGCTACGCTGTCTTTTACTAATCGCAAGAAAC  
AGTGCTCGTCATGGGTGGTAACTCCTTGGTGCCACCAGAACGCATGTG

GTGCGTTTGTGTGTTCCGCTTTGTTTTCTTGGGAGATTTTCGCTGCGGC  
CTAATGCAGCCAACCCTTTATGGAATTGTGTGCCCTGCTGTCTTGTCA  
GG

>TgGoatJpOk10

TTGACATCTGCCTGAACTCGAGGTACTACATCGTCCCCGGCATTGGTG  
ATTTTCGGTGACCGGTAAGAAATAACGCTTTGAAGGTCGTTGGCTTGTA  
TTACCGTCACTACTGCGACGACATACTGGAGAACTCGAGCATCCTTTAT  
GGGTTTGTGTTGATGAACGTAGGACTACCAGATATCATTTCTTCATTG  
GAACACTTTATTGTACACGCATGCCGTTTATGCGCTGCTTATCCGAGG  
GTGGCATCACAGGGACCCTACAAGAAGCTGACGGGGCACCTCCACTAT  
GAAGTGACATGCCAATGCATGCCCAGGTTGCATGTTCCAAGTGTCTGG  
TATCTTTGGCTACGCTGTCTTTACTAATCGCAAGAAACAGTGCTCGT  
CATGGGTGGTAACTCCTTGGTGCCACCAGAACGCATGTGGTGCGTTT  
GTTGTTCCGCTTTGTTTTCTTGGGAGATTTTCGCTGCGGCCTAATGCA  
GCCAACCCTTTATGGAATTGTGTGCCCTGCTGTCTTGTGTCAGGTACTTT  
GGA

>TgGoatJpOk11

TCGTCCCCGGCATTGGTGATTTTCGGTGACCGGTAAGAAATAACGCTTT  
GAAGGTCGTTGGCTTGATTACCGTCACTACTGCGACGACATACTGGA  
GAACTCGAGCATCCTTTATGGGTTTGTGTTGATGAACGTAGGACTACC  
AGATATCATTTCTTCATTGGAACACTTTATTGTACACGCATGCCGTTTA  
TGCGCTGCTTATCCGAGGGTGGCATCACAGGGACCCTACAAGAAGCTG  
ACGGGGCACCTCCACTATGAAGTGACATGCCAATGCATGCCCAGGTTG  
CATGTTCCAAGTGTCTGGTATCTTTGGCTACGCTGTCTTTTACTAATC  
GCAAGAAACAGTGCTCGTCATGGGTGGTAACTCCTTGGTGCCACCAGA  
ACGCATGTGGTGCGTTTGTGTTCCGCTTTGTTTTCTTGGGAGATTT  
CGCTGCGGCCTAATGCAGCCAACCCTTTATGGAATTGTGTGCCCTGCT  
GTCTTGTGTCAGGTACTTTGGAACCATGTAGG
