# Supplementary material for: Molecular and biological analysis revealed genetic diversity and high virulence strain of Toxoplasma gondii in Japan
Source: PubMed Central journal article supplement (PMC6996823; doi:10.1371/journal.pone.0227749), 2020-02-03
Supplement: pone.0227749.s005.pdf [file pone.0227749.s005.pdf]

TgCatJpOk3

>ROP5 (consensus sequence)

ATGGCGACGAAGCTCGCTAGACTAGCCACGTGGCTTGTCTTGGTAGGTT  
GCCTGTTGTGGCGGGCGGGGGCAGTTCAGCTCTCTCCGCCAAACTCCA  
GGACGAATGATCTGGCTTCGGGAACCCCGCATGTGGCTCGTGGGGACA  
CTGAGGCGCAGTCAGGAACTGGAGACGATTCAGATTTCCCGCAGGGCG  
TGGTCGAAGAGGTGGCAGATATGAGCGGCGGCAGAGTTCCCCGAGTGC  
CAGCATCGTCTACCACCACATCTGCGTCCGAGGGGATTTTCAGAAGATT  
AGTTCGCAGACTTCGTTCGGGGAAGAGGAACCGCAGATGGCGCAGGAGT  
TGCTGACGAAACCCATCAGGGGCGCGCCCGCCACTTCGGAAGAGACT  
TGCTCAGCACTTCGTTAGGCTGAGGGGCTTCTTCGGACGCCTTACGCC  
GAGGTGGCTCTCCGGTCTCGGCCGCCGGGCGCAAAGATGGTGGAGAG  
GGAGACAGAGACCGCTGCTGGACCCTTCGTTTCATGGGTTGGAAGCTG  
GAGATTCGTTTCATGCGCGACCTGCTGAAACGTGAAGAAGAGCTGATTG  
GATACTGTCGCGAAGAAGCGTTGGAAGAACCTGCAGCGATGGTTGAGG  
CTGTCATGGCAACTGTATGGCCGAAAATGCTGAAACAACCGTGGATTC  
ACTTTTGAGTCAGGGAGAGCGGAAGTTGAAATTGGTGGAGCCTCTTCG  
AGTCGGTGACCGATCTGTCGTATTTTAGTAAGGGATGTAGAGCGCCTG  
GAGGATTCGCTCTGAAGGTCTTCACTATGGGTGCCGAGAATTCCCGAT  
CAGAGCTGGAGCGGTTGCATGAAGCGACTTTTGCGGCAGCGAGGTTGC  
TTGGGGAGAGTCCAGAGGAGGCACGGGACAGACGCAGGCTTTTACTTC  
CCTCCGATGCTGTGGCAGTTCAGTCTCAGCCCCCTTTCGCTCAGCTGAG  
TCCAGGACAGAGCGACTATGCAGTCGCGAACTATTTCTTTCTCATGCC  
GCTGCGTCCGGTGGATCTTGAATTGCTCTTTAGGACATTGGACTTCGTGT  
ATGTATTCAGGGGGGAAGAAGGTATTTTAGCGCGTCACTTACTAACGGC  
ACAGCTGATCCGTCTGGCAGCCAACCTGCAGAGCAAAGGACTTGTGCA  
TGGACGCTTCACACCTGAAAACCTTTTCATTATGCCCGATGGCCGCCTG  
ATGATGGGGGATGTATCCACGTTGAGGAAGGTTCGGAACCCGAGGACCG  
GCATCAAGCGTCCCGGTTACCTATGCGCCTCGGGAGTTCCTGAATGCAA  
ACACGGCAACATTTACACACGCGCTCAATGCGTGGCAACTGGGTCTTAG  
CATATACCGGGTTTGGTGCCTAGTCTTGCCTTTCGGACTCGTGACACCT  
GGGATCAAACGGACATGGAAAAGGCCAAGTCTACGAGTTCAGGGACT  
GACAGTCTGCTATTCGACTCATGTATACCTGTGCCTGACTTCGTGCAGA  
CACTTACTAGACGGTTCCTCAACTTCGATAGGCGGGCAGCGCCTGCTTCC  
CTTGGAGGCCATGGAGACGCCAGAGTTCCTCCAGCTCCAAAACGAAATA

TCGAGCAGCCTATCAACAGGACAACCTACTGCTGCGCCCTCAGTCGCTT  
GA

>ROP16

ATGAAAGTGACCACGAAAGGGCTTGCTTTTGCTCTTGCACTGTTGTTTT  
GTACACGCTGCGCAACTGCACGATACATGTCGTTTGAGGAAGCGCAAAA  
AGCAAGTGAAGCAGCGAAGCGCCAGATTGCCACACTCCCCTCTCCAGA  
TTCTACTCTTTCGAATCCAGGTAGCAAGCATAGAAACCGGGGAGGGTCT  
CCTGCGGCAGGGCAACCTTCTCAATCCACACTACAACCTGAACAAGCGG  
CGGCTGAAGTAGGTCTCGGTGCTGGTGGCTCGACTCAGGGGCAGGGAC  
GCACCGGTGGCAGCGCGGGTGCTAGAGAGGAGCGGAGGAGTCCTTCC  
CCCCAATCTGCTTATCCGGCGACTAGCTCAGCCTCGCTAAGGGGGCTACC  
AAACCAGCTTTCACCCTCGCATCTTCCACCACGCAGCAGCGGACCGG  
GAGGATGGTTTCCAACAGAGTCAATATTTACGCCATGGAGTTCTCCGCC  
GCAACCATTGACACAACGAAAGCCATCTCTATCTGGGGTGGTCGTTACC  
GAATTTCAAGAGCCACAAGAACAGTATGGCGCAGCGAGCAGTCTTGCG  
TCCTCGCCAAAGCGATACGTCAGTGGCGCAAGCTCGAGTGCATTGTCAG  
GAAAGGCGGTGCCAACGCCTGCGTCGCTTGGTCAAGAAAATCCTCTTTT  
CCCTGTTTCAGAGCGCTACATTGGATTCAGGAATACAGTCTCCGGCACA  
GAGCGTCGGGGATCCCCTCAAAGACAGATTGCGATGTCGACCGAAAAT  
CCAGCGGATAGCGGCGCCTCGCAGCTTGCCTCCAGTGTTTCTAGTTATG  
TAGCAGTACAACTCCTCATGTGAAACGTTTCAGAACGCATCCGGCGCGT  
TCGACTTTCAGAAGAGGGTCTGGAAGAAGTTCAGCAGCTGAAAGCAGC  
TGCCGCACAGCTTCTCGTAGCGGTTCCGGACTATGAGGCAATGCGGGGCT  
GTTCTGCAAGAGGCGGTCTCTCAGAACAGAGGGTTGCTACCCGTAAG  
CGGAAGAGAAAGCAACCTCCAGGAGCGGTGGAGTCAGCTGTTGACGAA  
GTGTTCCCTCCAAATGAGCGTGTCATGATGATAAATGCCAACGGAGTGC  
CGATCGCTCTATACAATCGTGGGCACCTCGGCAGTGGACATTTCCGGGGC  
TGTCATCAAGGCCAGCTTAGACGATGGGACGTTGTATGCAGCGAAGGTG  
CCGTACAGCCAGATCGTCCCGAATGCTGATGCCACGTCAGCAGAACTGG  
AGGCGGAAATTTCCCTCAGCTAGGGCGGAGTTGGTAAAGACAATTCGACA  
GGAGTTGGATGTTCCGGGATAAGCTGGTGGCTAAAGGGGCTCACACTTACA  
GAGACTGCGGAGCAATACGGTCTACCATTGTGCCAAATGACTTTAACGC  
TTCTGAGAACAAAGCAACCGTGGTACGTCGAGGTTCTCGACTCGTTGT  
CGTGTCTAAAGAAGTCATGCTGCTGCCATTAATTGATGGCTCCCCATCG  
AACAGTCTAGTCCAGTCGCAACCACCATTTCTCTTCCAGCGAGCTGTGG

CAAGGGAAGCAATTATTGCATTGGCCAAGCTTCACGAACTTGGATTTCGC  
GCATGGAGATGTAAATTGAACAACATGATGATCGATGTCCACGGCTTT  
GGGCATATGCTTGACATGGGCAGTGTGCGGCCTGTTGACAGCTGTGTAA  
GCGAGGAAGATAAATATTACCTGCGTTTGTGGGCTCCTGAACTTGCGAA  
ATCACAGCACACGTCGCAGCAGACATGTCTGAAGCGTGGCGCTCTCGAT  
GTGTGGGCCTTAGGGTTGGCAATCTTCGAGTTCGTCTGCTTCAACCGAC  
TTCCTTACAGCCTTTCGAATCTGCCGAGTTCCTCTGGTCGAGAGTTGA  
ACACCTTTCGCGCCTTCGCCTCTCAGATTTCTCTGCCAAGGATTGTAAC  
GAATCTGATCCAGCAGTGATGGGAATTGTTGCTCAATTTCTAAATCCAAA  
TCCTGAAGAGCGCCCTGAACTCCCGAAATTCGTCAGCAGTTACACCTTC  
TTTCGGCAAGCCCCTGGAGTACTTCTCATCTCACTAGGATTCCAACCTAC  
CGAACTTTCTTCACATCGGATGTAG

>ROP18

ATTCGGGGCAAGAAAGAAGGAAGAAAATAAAGACGAGCGAGCACGCGGAC  
TCCTCGGTTCCCTCGTTCGAGCTAGCGACTGCGGGAGAACCACATCTTTGGC  
CCGAGATTCGAAACGCGGAAGTAACTCGAGTCGATGCCTCGCTAGATGGCGA  
CCAGAAAAGAAAACGAGTGAACTCTTGAAAGCAGCACCTGAGGAGACAG  
CCAGGAAAGAAGGGACAGGAAGAACTCGAGAGAAGCGGCAGGAGACTGT  
CACAGCTCGTCGACCACACAGCTAAACTGCCCGCCCTCTTTCATTAAGTCCC  
GTGTTTGAACGACGTCCGGGAGTGCCTTTTTCTTTTCGTTTCCCGACGTAGCA  
GCGAACCTAGCTGAATATTCCAGTTTCGCTTTGAGTTCATAACTCCTTCGTTT  
TCTCTCTCCGCCCCTCAGTTCCTTCCCTGGTGTCTTCGTGACATTTTATTAA  
GTTCTATCGCGCCACTCGGACTTTGTTCCCTGGCACCCCTTTTGTAGCTAGGACT  
CCTTGACGAGTCAGTCAGATTGACGAGGTCGGCTAGCTAGGACTCCTTGACG  
CGTCAGTCAGATTGACGAGGCCGGCTAGCTAGGACTCCTTGACGCGTCAGTC  
AGATTGACGAGGCCGGCTAGCCACGCTATGCACCTCTTGCATACAATTGTTGT  
AGACAGCATGGTGGTGTGCGAGACACTGCAGTCAAATGCCTCACCCAACGC  
CGCGTCTCATTCTTCCAAAAACCTGTCCGTGTCTTCGACAGATTGATACAGCC  
GTTGACAAAGCAATACCATATTTTACAGTTTTGTACTCACCCAGTCCAGTTT  
GTGTGAAAGTTGTGATGTTTTCCGGTACAGCGGCCACCTCTTACGCGTACC  
GTCGTCCGAATGGGTTTAGCGACTCTTCTCCCGAAGACAGCCTGTCTTG  
CGGTGTTAAATGTAGCGCTTGTCTTCCCTGCTCTTCCAAGTCCAGGATGG  
GACCGGAATCACACTTGATCCTTCAAAACTCGACTCCAACCGACAAGT  
TTGGATTCGCAACAGCACGTTGCTGACAAGCGGTGGCCTGCTACAGTT  
GGCCACTACAAATATTTAGCAGGAGCGACAGAAAGCACTCGAGACGTTT

CATTGCTGGAGGAAAGGGCTCAACACCGGGTAAATGCGCAAGAAACAA  
ACCAACGGCGCACGATTTTTTCAGAGGCTTCTGAATCTCTTGAGACGGAG  
AGAAAGAGATGGTGAAGTCTCGGGTCCGCAGCTGATAGCTCCTCGAG  
ACCCCGTCTGTCCGTACGACAGAGGCTTGCTCAACTTTGGCGTAAAGCG  
AAATCGTTCTTCACACGCGGAATCCCGAGGTACTTTTTCTCAAGGGCGTA  
ACCGACTGCGAAGTTTGCGGGCACAAAGACGGCGATCTGAATTGTTTTT  
TGAGAAGGCGGATTCTGGATGCGTCATCGGCAAACGCATCCTGGCGCA  
CATGCAAGAACAAATCGGGCAGCCTCAAGCGCTAGGAAATAGTGAACGA  
CTGGATAGAATTCTGACTGTCGCTGCCTGGCCTCCGGACGTTCCAGAAA  
GATTTGTTTTCTGTGACTACCGGTGAAACCCGGACGCTGGTGAGAGGTG  
CACCCCTTGGCTCTGGTGGATTCGCCACTGTATATGAGGCTACAGACGT  
GGAGACGAATGAAGAGTTGGCTGTAAAGTTTTTCATGTCAGAAAAGGA  
GCCACCGATGAGACTATGCGTGACTTGCAGAGGGAGTCGTTCTGCTAC  
AGGAACTTTAGTCTAGCCAAGACGGCGAAGGATGCCCAGGAACGCTGT  
AGATTCATGGTTCCTAGTGATGTTGTGATGTTAGAGGGACAGCCAGCAT  
CCACAGAGGTCGTGATTGGTTTGACGACTCGGTGGGTACCAAAC TATTT  
TCTTCTCATGATGCGGGCAGAAACGGACATGAGCAAAGTCATTT CATGG  
GTATTTGGAGATGCGTCTGTCAATAACAGTGAATTAGGCCTGGTTCGTT  
GAATGTACCTATCCAGTCAGGCAATCAGACTAGTGGCCAATGTTCAAGC  
TCAGGGAATTGTGCATACGGATATCAAACCGGCGAATTCCTCCTCTTG  
AAAGACGGTCGCCTGTTTCTCGGCGACTTCGGAACGTATAGAATCAATA  
ATTCGGTTGGACCCGCGATAGGTACTCCCGGTTACGAGCCTCCGGAGCG  
ACCGTTTCAGACTACAGGCATCACCTATACATTCACCACTGACGCGTGG  
CAACTCGGTATAACTTTGTACTGCATCTGGTGCAAGGAACGTCCAACTC  
CGGCCGACGGCATCTGGGACTACTTACACTTCGCAGATTGTCCTTCCAC  
GCCTGAGCTGGTTCAAGACCTCATCCGAAACCTCTTGAATCGAGAGCCT  
CAGAAACGGATGCTCCCGCTACAAGCCTTGGAGACCGCAGCGTTTAAC  
GAGATGGATT CAGTAGTAAAACGCGCCGCGCAAAACTTCGAACAGCAG  
GAACATCTCCACACAGAATAA

TgCatJpOk4

>ROP5 (consensus sequence)

ATGGCGACGAAGCTCGCTAGACTAGCCACGTGGCTTGTCTTGGTAGGTT  
GCCTGTTGTGGCGGGCGGGGGCAGTTCAGCTCTCTCCGCCAAACTCCA  
GGACGAATGATCTGGCTTCGGGAACCCCGCATGTGGCTCGTGGGGACA  
CTGAGGCGCAGTCAGGAAGTGGAGACGATTCAGATTTTCCGCAGGCCG  
TGGCCGAAGAGGTGGCAGATATGAGCGGCGGCAGAGTTCCCCGAGTGC  
CAGCATCGTCTACCACCACATCTGCGTCCGAGGGGATTTTCAGAAGATT  
AGTTCGCAGACTTCGTTCGGGGAAGAGGAACCGCAGATGGCGCAGGAGT  
TGCTGACGAAACCCATCAGGAGCCGCGCCCGCCACTTCGGAAGAGACT  
TGCTCAGCACTTCCGTAGGCTGAGGGGCTTCTTCGGACGCCTTACGCC  
GAGGTGGCTCTCCGGTCTCGGCCGCCGGGCGCAAAGATGGTGGAGAG  
GGAGACAGAGACCGCTGCTGGACCCTTCGTTTCATGGGTTGGAAGCTG  
GAGATTCGTTTCATGCGCGACCTGCTGAAACGTGAAGAAGAGCTGATTG  
GATACTGTCGCGAAGAAGCGTTGAAAGAACCTGCAGCGATGGTTGAGG  
CTGTCACGGCAACTGTATGGCCGCAAATGCTGAAACAACCGTGGATTC  
GCTTTTGAGTCAGGGAGAGCGGAAGTTGAAATTGGTGGAGCCTCTTCG  
AGTCGGTGACCGATCTGTCGTATTTTTAGTAAGGGATGTAGAGCGCCTG  
GAGGATTCGCTCTGAAGGTCTTCACTATGGGTGCCGAGAATCCCGAT  
CAGAGCTGGAGCGGTTGCATGAAGCGACTTTTGCGGCAGCGAGGTTGC  
TTGGGGAGAGTCCAGAGGAGGCACGGGACAGACGCAGGCTTTTACTTC  
CCTCCGATGCTGTGGCAGTTCAGTCTCAGCCCCCTTTCGCTCAGCTGAG  
TCCAGGACAGAGCGACTATGCAGTCGCGAACTACTTGCTTCTCATGCCC  
GCTGCGTCGGTGGATCTTGAATTGCTCTTTAGCACATTGGACTTCGTGT  
ATGTATTCAGGGGGGCAGAAGATTTTTTAGCGCTTCACATACTAACGGC  
ACAGCTGATCCGTCTGGCAGCCAACCTGCAGAGCAAAGGACTTGTGCA  
TGGACATTTACACCCGGATAACCTTTTCATTATGCCCGATGGCCGCCTGA  
TGCTGGGGGATGTATCCGTGTTGAGGAAGGTCGGAACCCGAGGACCGG  
CATCAAGCGTCCCGGTTACCTATGCGCCTCGCGAGTTCTTGAATGCAAG  
CACGGCAACATTTACACACGCGCTGGATGCGTGGCAACTGGGTCTTAGC  
ATATAACGGGTTTGGTGCCTATTCTTGCCTTTCGGACTCGTGACACCTG  
GGATCAAAGGGTCATGAAAAGACCAAGTCTACGAGTTCAGGGGACTG  
ACAGTCTGGCATTTCGGCTCATGTACACCTCTGCCTGACTTCGTGCAGAC  
ACTTATTGGACGGTTCCTCAACTTCGATAGGCGTCGACGCCTGCTTCCC  
TTGGAGGCCATGGAGACGCCAGAGTTCCTCCAGCTCCAAAACGAAATAT  
CGAGCAGCCTATCAACAGGACAACCCATTGCTGCGCCCTCAGTCGCTTG

A

>ROP16

ATGAAAGTGACCACGAAAGGGCTTGCTTTTGCTCTTGCACTGTTGTTTT  
GTACACGCTGCGCAACTGCACGATACATGTCGTTTGAGGAAGCGCAAAA  
AGCAAGTGAAGCAGCGAAGCGCCAGATTGCCACACTCCCCTCTCCAGA  
TTCTACTCTTTCGAATCCAGGTAGCAAGCATAGAAACCGGGGAGGGTCT  
CCTGCGGCAGGGCAACCTTCTCAATCCACACTACAACCTGAACAAGCGG  
CGGCTGAAGTAGGTCTCGGTGCTGGTGGCTCGACTCAGGGGCAGGGAC  
GCACCGGTGGCAGCGCGGGTGCTAGAGAGGAGCGGAGGAGTCCTTCC  
CCCCAATCTGCTTATCCGGCGACTAGCTCAGCCTCGCTAAGGGGCTACC  
AAACCAGCTTTCACCCTCGCATCTTCCACCACGCAGCAGCGGACCGG  
GAGGATGGTTTCCAACAGAGTCAATATTTACGCCATGGAGTTCTCCGCC  
GCAACCATTGACACAACGAAAGCCATCTCTATCTGGGGTGGTCGTTACC  
GAATTTCAAGAGCCACAAGAACAGTATGGCGCAGCGAGCAGTCTTGCG  
TCCTCGCCAAAGCGATACGTCAGTGGCGCAAGCTCGAGTGCATTGTCAG  
GAAAGGCGGTGCCAACGCCTGCGTCGCTTGGTCAAGAAAATCCTCTTTT  
CCCTGTTTCAAGAGCGCTACATTGGATTCAAGGAATACAGTCTCCGGCACA  
GAGCGTCGGGGATCCCCTCAAAGACAGATTGCGATGTCGACCGAAAAT  
CCAGCGGATAGCGGCGCCTCGCAGCTTGCCTCCAGTGTCTTAGTTATG  
TAGCAGTACAACTCCTCATGTGAAACGTTTCAAGAACGCATCCGGCGCGT  
TCGACTTTCAGAAGAGGGTCTGGAAGAAGTTCAGCAGCTGAAAGCAGC  
TGCCGCACAGCTTCTCGTAGCGGTCCGGACTATGAGGCAATGCGGGCT  
GTTCTGCAAGAGGCGGTCTCTCAGAACAGAGGGTTGCTACCCGTAAG  
CGGAAGAGAAAAGCAACCTCCAGGAGCGGTGGAGTCAGCTGTTGACGAA  
GTGTTCCCTCCAAATGAGCGTGTGATGATAAATGCCAACGGAGTGC  
CGATCGCTCTATACAATCGTGGGCACCTCGGCAGTGGACATTTCCGGGGC  
TGTCATCAAGGCCAGCTTAGACGATGGGACGTTGTATGCAGCGAAGGTG  
CCGTACAGCCAGATCGTCCCGAATGCTGATGCCACGTCAGCAGAACTGG  
AGGCGGAAATTTCCCTCAGCTAGGGCGGAGTTGGTAAAGACAATTCGACA  
GGAGTTGGATGTTCCGGGATAAGCTGGTGGCTAAAGGGGCTCACACTTACA  
GAGACTGCGGAGCAATACGGTCTACCATTGTGCCAAATGACTTTAACGC  
TTCTGAGAACAAAGCAACCGTGGTACGTCGAGGTTCTCGACTCGTTGT  
CGTGTCTAAAGAAGTCATGCTGCTGCCATTAATTGATGGCTCCGCATTG  
AACAGTCTAGTCCAGTCGCAACCACCATTTCTCTTCCAGCGAGCTGTGG  
CAAGGGAAGCAATTATTGCATTGGCCAAGCTTCACGAACTTGGATTTCGC

GCATGGAGATGTAAATTGAACAACATGATGATCGATGTCCACGGCTTT  
GGGCATATGCTTGACATGGGCAGTGTGCGGCGTGTTGACAGCTGTGTAA  
GCGAGGAAGATAAATATTACCTGCGTTTGTGGGCTCCTGAACTTGCGAA  
ATCACAGCACACGTCGCAGCAGACATGTCTGAAGCGTGGCGCTCTCGAT  
GTGTGGGCCTTAGGGTTGGCAATCTTCGAGTTCGTCTGCTTCAACCGAC  
TTCCTTACAGCCTTTCGAATCTGCCGAGTTCACTCTGGTCGAGAGTTGA  
ACACCTTTCGCGCCTTCGCCTCTCAGATTTCTCTGCCAAGGATTGTAAC  
GAATCTGATCCAGCAGTGATGGGAATTGTTGCTCAATTTCTAAATCCAAA  
TCCTGAAGAGCGCCCTGAACTCCCGAAATTCGTCAGCAGTTACACCTTC  
TTTCGGCAAGCCCCTGGAGTACTTCTCATCTCACTAGGATTCCAACCTAC  
CGAACTTTCTTCACATCGGATGTAG

>ROP18

ATTCGGGGCAAGAAAGAAGGAAGAAAATAAAGACGAGCGAGCACGCGGAC  
TCCTCGGTTCCCTCGTTCGAGCTAGCGACTGCGGGAGAACCACATCTTTGGC  
CCGAGATTTCGAAACGCGGAAGTAACCTCGAGTCGATGCCTCGCTAGATGGCGA  
CCAGAAAAGAAAACGAGTGAACCTTGAAAGCAGCACCTGAGGAGACAG  
CCAGGAAAGAAGGGACAGGAAGAACTCGAGAGAAGCGGCAGGAGACTGT  
CACAGCTCGTCGACCACACAGCTAAACTGCCCGCCCTCTTTCATTAAGTCCC  
GTGTTTGAACGACGTCCGGGAGTGCCTTTTTCTTTTCGTTTCCCGACGTAGCA  
GCGAACCTAGCTGAATATTCCAGTTTCGCTTTGAGTTCATAACTCCTTCGTTT  
TCTCTCTTCCGCCCCTCAGTTCCTTCCCTGGTGTCTTCGTGACATTTTATTAA  
GTTCTATCGCGCCACTCGGACTTTGTTCCCTGGCACCCCTTTTGTAGCTAGGACT  
CCTTGACGAGTCAGTCAGATTGACGAGGTCGGCTAGCTAGGACTCCTTGACG  
CGTCAGTCAGATTGACGAGGCCGGCTAGCTAGGACTCCTTGACGCGTCAGTC  
AGATTGACGAGGCCGGCTAGCCACGCTATGCACCTCTTGCATACAATTGTTGT  
AGACAGCATGGTGGTGTGCGAGACACTGCAGTCAAATGCCTCACCCAACGC  
CGCGTCTCATTCTTCCAAAAACCTGTCCGTGTCTTCGACAGATTGATACAGCC  
GTTGACAAAGCAATACCATATTTTACAGTTTTGTACTCACCCCAGTCCAGTTT  
GTGTGAAAGTTGTGATGTTTTTCGGTACAGCGGCCACCTCTTACGCGTACC  
GTCGTCCGAATGGGTTTAGCGACTCTTCTCCCGAAGACAGCCTGTCTTG  
CGGTGTTAAATGTAGCGCTTGTCTTCCCTGCTCTTCCAAGTCCAGGATGG  
GACCGGAATCACACTTGATCCTTCAAACCTCGACTCCAAACCGACAAGT  
TTGGATTCGCAACAGCACGTTGCTGACAAGCGGTGGCCTGCTACAGTT  
GGCCACTACAAATATTTAGCAGGAGCGACAGAAAGCACTCGAGACGTTT  
CATTGCTGGAGGAAAGGGCTCAACACCGGGTAAATGCGCAAGAAACAA

ACCAACGGCGCACGATTTTTTCAGAGGCTTCTGAATCTCTTGAGACGGAG  
AGAAAGAGATGGTGAAGTCTCGGGTCCGCAGCTGATAGCTCCTCGAG  
ACCCCGTCTGTCCGTACGACAGAGGCTTGCTCAACTTTGGCGTAAAGCG  
AAATCGTTCTTCACACGCGGAATCCCGAGGTACTTTTTCTCAAGGGCGTA  
ACCGACTGCGAAGTTTGCGGGCACAAAGACGGCGATCTGAATTGTTTTT  
TGAGAAGGCGGATTCTGGATGCGTCATCGGCAAACGCATCCTGGCGCA  
CATGCAAGAACAATCGGGCAGCCTCAAGCGCTAGGAAATAGTGAACGA  
CTGGATAGAATTCTGACTGTGCTGCCTGGCCTCCGGACGTTCCAGAAA  
GATTTGTTTCTGTGACTACCGGTGAAACCCGGACGCTGGTGAGAGGTG  
CACCCCTTGGCTCTGGTGGATTCGCCACTGTATATGAGGCTACAGACGT  
GGAGACGAATGAAGAGTTGGCTGTAAAGTTTTTCATGTCAGAAAAGGA  
GCCACCGATGAGACTATGCGTGACTTGCAGAGGGAGTCGTTCTGCTAC  
AGGAACTTTAGTCTAGCCAAGACGGCGAAGGATGCCCAGGAACGCTGT  
AGATTCATGGTTCCTAGTGATGTTGTGATGTTAGAGGGACAGCCAGCAT  
CCACAGAGGTCGTGATTGGTTTGACGACTCGGTGGGTACCAAACCTATTT  
TCTTCTCATGATGCGGGCAGAAACGGACATGAGCAAAGTCATTTTCATGG  
GTATTTGGAGATGCGTCTGTCAATAACAGTGAATTAGGCCTGGTCGTTT  
GAATGTACCTATCCAGTCAGGCAATCAGACTAGTGGCCAATGTTCAAGC  
TCAGGGAATTGTGCATACGGATATCAAACCGGCGAATTCCTCCTCTTG  
AAAGACGGTCGCCTGTTTCTCGGCGACTTCGGAACGTATAGAATCAATA  
ATTCGGTTGGACCCGCGATAGGTAATCCCGGTTACGAGCCTCCGGAGCG  
ACCGTTTCAGACTACAGGCATCACCTATACATTCACCACTGACGCGTGG  
CAACTCGGTATAACTTTGTACTGCATCTGGTGCAAGGAACGTCCAACCTC  
CGGCCGACGGCATCTGGGACTACTTACACTTCGCAGATTGTCCTTCCAC  
GCCTGAGCTGGTTCAAGACCTCATCCGAAACCTCTTGAATCGAGAGCCT  
CAGAAACGGATGCTCCCGCTACAAGCCTTGGAGACCGCAGCGTTTAAAC  
GAGATGGATTCAGTAGTAAAACGCGCCGCGCAAACTTCGAACAGCAG  
GAACATCTCCACACAGAATAA
